# Supplementary material
Source: Springer Nature journal article supplement (https://www.springermedizin.de/resource/supplementary/12881_2007_277_MOESM2_ESM.pdf/9452794)
Supplement: MOESM2 [file 9452794]

Online Table 2: Phenotypes Evaluated for Association using Family-based Analysis (FBAT)

| Group | Category  | Trait Label | Name                                                                    | FBAT Link                                                                                                                                                           |
|-------|-----------|-------------|-------------------------------------------------------------------------|---------------------------------------------------------------------------------------------------------------------------------------------------------------------|
| Aging | BoneAging | BUA         | Bone Ultrasound attenuation measured by QUS, multivariable adjusted     | <a href="http://www.ncbi.nlm.nih.gov/projects/gap/cgi-bin/analysis.cgi?id=pha001753">http://www.ncbi.nlm.nih.gov/projects/gap/cgi-bin/analysis.cgi?id=pha001753</a> |
| Aging | BoneAging | deltaOSSR   | Bone age by osseographic scoring system, multivariable adjusted         | <a href="http://www.ncbi.nlm.nih.gov/projects/gap/cgi-bin/analysis.cgi?id=pha001787">http://www.ncbi.nlm.nih.gov/projects/gap/cgi-bin/analysis.cgi?id=pha001787</a> |
| Aging | BoneAging | deltaOSSrf  | Bone age by osseographic scoring system (Women), multivariable adjusted | <a href="http://www.ncbi.nlm.nih.gov/projects/gap/cgi-bin/analysis.cgi?id=pha001789">http://www.ncbi.nlm.nih.gov/projects/gap/cgi-bin/analysis.cgi?id=pha001789</a> |
| Aging | BoneAging | deltaOSSrm  | Bone age by osseographic scoring system (Men, multivariable adjusted)   | <a href="http://www.ncbi.nlm.nih.gov/projects/gap/cgi-bin/analysis.cgi?id=pha001791">http://www.ncbi.nlm.nih.gov/projects/gap/cgi-bin/analysis.cgi?id=pha001791</a> |
| Aging | BoneAging | FNBMd       | Femoral Neck BMD measured by DXA, multivariable adjusted                | <a href="http://www.ncbi.nlm.nih.gov/projects/gap/cgi-bin/analysis.cgi?id=pha001755">http://www.ncbi.nlm.nih.gov/projects/gap/cgi-bin/analysis.cgi?id=pha001755</a> |
| Aging | BoneAging | FNBMdf      | Femoral Neck BMD measured by DXA (Women), multivariable adjusted        | <a href="http://www.ncbi.nlm.nih.gov/projects/gap/cgi-bin/analysis.cgi?id=pha001793">http://www.ncbi.nlm.nih.gov/projects/gap/cgi-bin/analysis.cgi?id=pha001793</a> |
| Aging | BoneAging | FNBMdm      | Femoral Neck BMD measured by DXA (Men), multivariable adjusted          | <a href="http://www.ncbi.nlm.nih.gov/projects/gap/cgi-bin/analysis.cgi?id=pha001795">http://www.ncbi.nlm.nih.gov/projects/gap/cgi-bin/analysis.cgi?id=pha001795</a> |
| Aging | BoneAging | ITAvgBR1rf  | Hip geometry (IT BucklingRatio, Women), multivariable adjusted          | <a href="http://www.ncbi.nlm.nih.gov/projects/gap/cgi-bin/analysis.cgi?id=pha001797">http://www.ncbi.nlm.nih.gov/projects/gap/cgi-bin/analysis.cgi?id=pha001797</a> |
| Aging | BoneAging | ITAvgBR1rm  | Hip geometry (IT BucklingRatio, Men), multivariable adjusted            | <a href="http://www.ncbi.nlm.nih.gov/projects/gap/cgi-bin/analysis.cgi?id=pha001799">http://www.ncbi.nlm.nih.gov/projects/gap/cgi-bin/analysis.cgi?id=pha001799</a> |
| Aging | BoneAging | ITAvgBRrf   | Hip geometry (IT BucklingRatio, Women), age- adjusted                   | <a href="http://www.ncbi.nlm.nih.gov/projects/gap/cgi-bin/analysis.cgi?id=pha001801">http://www.ncbi.nlm.nih.gov/projects/gap/cgi-bin/analysis.cgi?id=pha001801</a> |
| Aging | BoneAging | ITAvgBRrm   | Hip geometry (IT BucklingRatio, Men), age- adjusted                     | <a href="http://www.ncbi.nlm.nih.gov/projects/gap/cgi-bin/analysis.cgi?id=pha001803">http://www.ncbi.nlm.nih.gov/projects/gap/cgi-bin/analysis.cgi?id=pha001803</a> |
| Aging | BoneAging | LSBMD       | Lumbar Spine BMD measured by DXA, multivariable adjusted                | <a href="http://www.ncbi.nlm.nih.gov/projects/gap/cgi-bin/analysis.cgi?id=pha001757">http://www.ncbi.nlm.nih.gov/projects/gap/cgi-bin/analysis.cgi?id=pha001757</a> |
| Aging | BoneAging | LSBMDf      | Spine Neck BMD measured by DXA (Women), multivariable adjusted          | <a href="http://www.ncbi.nlm.nih.gov/projects/gap/cgi-bin/analysis.cgi?id=pha001817">http://www.ncbi.nlm.nih.gov/projects/gap/cgi-bin/analysis.cgi?id=pha001817</a> |
| Aging | BoneAging | LSBMDm      | Spine Neck BMD measured by DXA (Men), multivariable adjusted            | <a href="http://www.ncbi.nlm.nih.gov/projects/gap/cgi-bin/analysis.cgi?id=pha001819">http://www.ncbi.nlm.nih.gov/projects/gap/cgi-bin/analysis.cgi?id=pha001819</a> |
| Aging | BoneAging | NeckCSMI    | Hip geometry by DXA (Neck Moment of Inertia), age- and sex-adjusted     | <a href="http://www.ncbi.nlm.nih.gov/projects/gap/cgi-bin/analysis.cgi?id=pha001759">http://www.ncbi.nlm.nih.gov/projects/gap/cgi-bin/analysis.cgi?id=pha001759</a> |
| Aging | BoneAging | NeckCSMI1   | Hip geometry by DXA (Neck Moment of Inertia), multivariable adjusted    | <a href="http://www.ncbi.nlm.nih.gov/projects/gap/cgi-bin/analysis.cgi?id=pha001761">http://www.ncbi.nlm.nih.gov/projects/gap/cgi-bin/analysis.cgi?id=pha001761</a> |
| Aging | BoneAging | NeckLeng    | Hip geometry by DXA (Neck Length), age- and sex-adjusted                | <a href="http://www.ncbi.nlm.nih.gov/projects/gap/cgi-bin/analysis.cgi?id=pha001763">http://www.ncbi.nlm.nih.gov/projects/gap/cgi-bin/analysis.cgi?id=pha001763</a> |
| Aging | BoneAging | NeckLeng1   | Hip geometry by DXA (Neck Length), multivariable adjusted               | <a href="http://www.ncbi.nlm.nih.gov/projects/gap/cgi-bin/analysis.cgi?id=pha001765">http://www.ncbi.nlm.nih.gov/projects/gap/cgi-bin/analysis.cgi?id=pha001765</a> |
| Aging | BoneAging | NeckLengf   | Hip geometry (Neck Length, Women), multivariable adjusted               | <a href="http://www.ncbi.nlm.nih.gov/projects/gap/cgi-bin/analysis.cgi?id=pha001821">http://www.ncbi.nlm.nih.gov/projects/gap/cgi-bin/analysis.cgi?id=pha001821</a> |
| Aging | BoneAging | NeckLengm   | Hip geometry (Neck Length, Men), multivariable adjusted                 | <a href="http://www.ncbi.nlm.nih.gov/projects/gap/cgi-bin/analysis.cgi?id=pha001823">http://www.ncbi.nlm.nih.gov/projects/gap/cgi-bin/analysis.cgi?id=pha001823</a> |
| Aging | BoneAging | NeckW       | Hip geometry by DXA (Neck Width), age- and sex-adjusted                 | <a href="http://www.ncbi.nlm.nih.gov/projects/gap/cgi-bin/analysis.cgi?id=pha001767">http://www.ncbi.nlm.nih.gov/projects/gap/cgi-bin/analysis.cgi?id=pha001767</a> |
| Aging | BoneAging | NeckW1      | Hip geometry by DXA (Neck Width), multivariable adjusted                | <a href="http://www.ncbi.nlm.nih.gov/projects/gap/cgi-bin/analysis.cgi?id=pha001769">http://www.ncbi.nlm.nih.gov/projects/gap/cgi-bin/analysis.cgi?id=pha001769</a> |
| Aging | BoneAging | NeckW1rf    | Hip geometry (Neck Width, Women), multivariable adjusted                | <a href="http://www.ncbi.nlm.nih.gov/projects/gap/cgi-bin/analysis.cgi?id=pha001825">http://www.ncbi.nlm.nih.gov/projects/gap/cgi-bin/analysis.cgi?id=pha001825</a> |
| Aging | BoneAging | NeckW1rm    | Hip geometry (Neck Width, Men), multivariable adjusted                  | <a href="http://www.ncbi.nlm.nih.gov/projects/gap/cgi-bin/analysis.cgi?id=pha001827">http://www.ncbi.nlm.nih.gov/projects/gap/cgi-bin/analysis.cgi?id=pha001827</a> |
| Aging | BoneAging | NeckWrf     | Hip geometry (Neck Width, Women), age-adjusted                          | <a href="http://www.ncbi.nlm.nih.gov/projects/gap/cgi-bin/analysis.cgi?id=pha001829">http://www.ncbi.nlm.nih.gov/projects/gap/cgi-bin/analysis.cgi?id=pha001829</a> |
| Aging | BoneAging | NeckWrm     | Hip geometry (Neck Width, Men), age-adjusted                            | <a href="http://www.ncbi.nlm.nih.gov/projects/gap/cgi-bin/analysis.cgi?id=pha001831">http://www.ncbi.nlm.nih.gov/projects/gap/cgi-bin/analysis.cgi?id=pha001831</a> |
| Aging | BoneAging | NeckZ       | Hip geometry by DXA (Neck Section Modulus), age- and sex-adjusted       | <a href="http://www.ncbi.nlm.nih.gov/projects/gap/cgi-bin/analysis.cgi?id=pha001771">http://www.ncbi.nlm.nih.gov/projects/gap/cgi-bin/analysis.cgi?id=pha001771</a> |
| Aging | BoneAging | NeckZ1      | Hip geometry by DXA (Neck Section Modulus), multivariable adjusted      | <a href="http://www.ncbi.nlm.nih.gov/projects/gap/cgi-bin/analysis.cgi?id=pha001773">http://www.ncbi.nlm.nih.gov/projects/gap/cgi-bin/analysis.cgi?id=pha001773</a> |
| Aging | BoneAging | NeckZ1rf    | Hip geometry (Neck Section Modulus, Women), multivariable adjusted      | <a href="http://www.ncbi.nlm.nih.gov/projects/gap/cgi-bin/analysis.cgi?id=pha001833">http://www.ncbi.nlm.nih.gov/projects/gap/cgi-bin/analysis.cgi?id=pha001833</a> |
| Aging | BoneAging | NeckZ1rm    | Hip geometry (Neck Section Modulus, Men), multivariable adjusted        | <a href="http://www.ncbi.nlm.nih.gov/projects/gap/cgi-bin/analysis.cgi?id=pha001835">http://www.ncbi.nlm.nih.gov/projects/gap/cgi-bin/analysis.cgi?id=pha001835</a> |
| Aging | BoneAging | NeckZrf     | Hip geometry (Neck Section Modulus, Women), age-adjusted                | <a href="http://www.ncbi.nlm.nih.gov/projects/gap/cgi-bin/analysis.cgi?id=pha001837">http://www.ncbi.nlm.nih.gov/projects/gap/cgi-bin/analysis.cgi?id=pha001837</a> |
| Aging | BoneAging | NeckZrm     | Hip geometry (Neck Section Modulus, Men), age-adjusted                  | <a href="http://www.ncbi.nlm.nih.gov/projects/gap/cgi-bin/analysis.cgi?id=pha001839">http://www.ncbi.nlm.nih.gov/projects/gap/cgi-bin/analysis.cgi?id=pha001839</a> |
| Aging | BoneAging | NNAvgBR1rf  | Hip geometry (NN BucklingRatio, Women), multivariable adjusted          | <a href="http://www.ncbi.nlm.nih.gov/projects/gap/cgi-bin/analysis.cgi?id=pha001841">http://www.ncbi.nlm.nih.gov/projects/gap/cgi-bin/analysis.cgi?id=pha001841</a> |
| Aging | BoneAging | NNAvgBR1rm  | Hip geometry (NN BucklingRatio, Men), multivariable adjusted            | <a href="http://www.ncbi.nlm.nih.gov/projects/gap/cgi-bin/analysis.cgi?id=pha001843">http://www.ncbi.nlm.nih.gov/projects/gap/cgi-bin/analysis.cgi?id=pha001843</a> |
| Aging | BoneAging | NNAvgBRrf   | Hip geometry (NN BucklingRatio, Women), age-adjusted                    | <a href="http://www.ncbi.nlm.nih.gov/projects/gap/cgi-bin/analysis.cgi?id=pha001845">http://www.ncbi.nlm.nih.gov/projects/gap/cgi-bin/analysis.cgi?id=pha001845</a> |
| Aging | BoneAging | NNAvgBRrm   | Hip geometry (NN BucklingRatio, Men), age-adjusted                      | <a href="http://www.ncbi.nlm.nih.gov/projects/gap/cgi-bin/analysis.cgi?id=pha001847">http://www.ncbi.nlm.nih.gov/projects/gap/cgi-bin/analysis.cgi?id=pha001847</a> |
| Aging | BoneAging | NNCSMI1rf   | Hip geometry (Neck CSMI, Women), multivariable adjusted                 | <a href="http://www.ncbi.nlm.nih.gov/projects/gap/cgi-bin/analysis.cgi?id=pha001849">http://www.ncbi.nlm.nih.gov/projects/gap/cgi-bin/analysis.cgi?id=pha001849</a> |
| Aging | BoneAging | NNCSMI1rm   | Hip geometry (Neck CSMI, Men), multivariable adjusted                   | <a href="http://www.ncbi.nlm.nih.gov/projects/gap/cgi-bin/analysis.cgi?id=pha001851">http://www.ncbi.nlm.nih.gov/projects/gap/cgi-bin/analysis.cgi?id=pha001851</a> |
| Aging | BoneAging | NNCSMIrf    | Hip geometry (Neck CSMI, Women), age-adjusted                           | <a href="http://www.ncbi.nlm.nih.gov/projects/gap/cgi-bin/analysis.cgi?id=pha001853">http://www.ncbi.nlm.nih.gov/projects/gap/cgi-bin/analysis.cgi?id=pha001853</a> |
| Aging | BoneAging | NNCSMIrm    | Hip geometry (Neck CSMI, Men), age-adjusted                             | <a href="http://www.ncbi.nlm.nih.gov/projects/gap/cgi-bin/analysis.cgi?id=pha001855">http://www.ncbi.nlm.nih.gov/projects/gap/cgi-bin/analysis.cgi?id=pha001855</a> |
| Aging | BoneAging | NSA         | Hip geometry by DXA (Neck-Shaft Angle), age- and sex-adjusted           | <a href="http://www.ncbi.nlm.nih.gov/projects/gap/cgi-bin/analysis.cgi?id=pha001775">http://www.ncbi.nlm.nih.gov/projects/gap/cgi-bin/analysis.cgi?id=pha001775</a> |
| Aging | BoneAging | NSA1        | Hip geometry by DXA (Neck-Shaft Angle), multivariable adjusted          | <a href="http://www.ncbi.nlm.nih.gov/projects/gap/cgi-bin/analysis.cgi?id=pha001777">http://www.ncbi.nlm.nih.gov/projects/gap/cgi-bin/analysis.cgi?id=pha001777</a> |
| Aging | BoneAging | NSA1f       | Hip geometry (Neck-Shaft Angle, Women), multivariable adjusted          | <a href="http://www.ncbi.nlm.nih.gov/projects/gap/cgi-bin/analysis.cgi?id=pha001857">http://www.ncbi.nlm.nih.gov/projects/gap/cgi-bin/analysis.cgi?id=pha001857</a> |
| Aging | BoneAging | NSA1m       | Hip geometry (Neck-Shaft Angle, Men), multivariable adjusted            | <a href="http://www.ncbi.nlm.nih.gov/projects/gap/cgi-bin/analysis.cgi?id=pha001859">http://www.ncbi.nlm.nih.gov/projects/gap/cgi-bin/analysis.cgi?id=pha001859</a> |
| Aging | BoneAging | NSA1rf      | Hip geometry (Shaft BucklingRatio, Women), multivariable adjusted       | <a href="http://www.ncbi.nlm.nih.gov/projects/gap/cgi-bin/analysis.cgi?id=pha001861">http://www.ncbi.nlm.nih.gov/projects/gap/cgi-bin/analysis.cgi?id=pha001861</a> |
| Aging | BoneAging | NSA1rm      | Hip geometry (Shaft BucklingRatio, Men), multivariable adjusted         | <a href="http://www.ncbi.nlm.nih.gov/projects/gap/cgi-bin/analysis.cgi?id=pha001863">http://www.ncbi.nlm.nih.gov/projects/gap/cgi-bin/analysis.cgi?id=pha001863</a> |
| Aging | BoneAging | NSA1rf      | Hip geometry (Shaft BucklingRatio, Women), age-adjusted                 | <a href="http://www.ncbi.nlm.nih.gov/projects/gap/cgi-bin/analysis.cgi?id=pha001865">http://www.ncbi.nlm.nih.gov/projects/gap/cgi-bin/analysis.cgi?id=pha001865</a> |
| Aging | BoneAging | NSA1rm      | Hip geometry (Shaft BucklingRatio, Men), age-adjusted                   | <a href="http://www.ncbi.nlm.nih.gov/projects/gap/cgi-bin/analysis.cgi?id=pha001867">http://www.ncbi.nlm.nih.gov/projects/gap/cgi-bin/analysis.cgi?id=pha001867</a> |
| Aging | BoneAging | NSA1rf      | Hip geometry (Shaft CSMI), multivariable adjusted                       | <a href="http://www.ncbi.nlm.nih.gov/projects/gap/cgi-bin/analysis.cgi?id=pha001869">http://www.ncbi.nlm.nih.gov/projects/gap/cgi-bin/analysis.cgi?id=pha001869</a> |
| Aging | BoneAging | NSA1rm      | Hip geometry (Shaft CSMI, Women), multivariable adjusted                | <a href="http://www.ncbi.nlm.nih.gov/projects/gap/cgi-bin/analysis.cgi?id=pha001871">http://www.ncbi.nlm.nih.gov/projects/gap/cgi-bin/analysis.cgi?id=pha001871</a> |
| Aging | BoneAging | NSA1rf      | Hip geometry (Shaft CSMI, Men), multivariable adjusted                  | <a href="http://www.ncbi.nlm.nih.gov/projects/gap/cgi-bin/analysis.cgi?id=pha001873">http://www.ncbi.nlm.nih.gov/projects/gap/cgi-bin/analysis.cgi?id=pha001873</a> |
| Aging | BoneAging | NSA1rm      | Hip geometry by DXA (Shaft Width), age- and sex-adjusted                | <a href="http://www.ncbi.nlm.nih.gov/projects/gap/cgi-bin/analysis.cgi?id=pha001779">http://www.ncbi.nlm.nih.gov/projects/gap/cgi-bin/analysis.cgi?id=pha001779</a> |
| Aging | BoneAging | NSA1rf      | Hip geometry by DXA (Shaft Width), multivariable adjusted               | <a href="http://www.ncbi.nlm.nih.gov/projects/gap/cgi-bin/analysis.cgi?id=pha001781">http://www.ncbi.nlm.nih.gov/projects/gap/cgi-bin/analysis.cgi?id=pha001781</a> |
| Aging | BoneAging | NSA1rm      | Hip geometry (Shaft Width, Women), multivariable adjusted               | <a href="http://www.ncbi.nlm.nih.gov/projects/gap/cgi-bin/analysis.cgi?id=pha001875">http://www.ncbi.nlm.nih.gov/projects/gap/cgi-bin/analysis.cgi?id=pha001875</a> |
| Aging | BoneAging | NSA1rf      | Hip geometry (Shaft Width, Men), multivariable adjusted                 | <a href="http://www.ncbi.nlm.nih.gov/projects/gap/cgi-bin/analysis.cgi?id=pha001877">http://www.ncbi.nlm.nih.gov/projects/gap/cgi-bin/analysis.cgi?id=pha001877</a> |
| Aging | BoneAging | NSA1rm      | Hip geometry (Shaft Width, Women), age-adjusted                         | <a href="http://www.ncbi.nlm.nih.gov/projects/gap/cgi-bin/analysis.cgi?id=pha001879">http://www.ncbi.nlm.nih.gov/projects/gap/cgi-bin/analysis.cgi?id=pha001879</a> |

Online Table 2: Phenotypes Evaluated for Association using Family-based Analysis (FBAT)

| Group | Category               | Trait Label        | Name                                                                                 | FBAT Link                                                                                                                                                           |
|-------|------------------------|--------------------|--------------------------------------------------------------------------------------|---------------------------------------------------------------------------------------------------------------------------------------------------------------------|
| Aging | BoneAging              | ShaftWm            | Hip geometry (Shaft Width, Men), age-adjusted                                        | <a href="http://www.ncbi.nlm.nih.gov/projects/gap/cgi-bin/analysis.cgi?id=pha001881">http://www.ncbi.nlm.nih.gov/projects/gap/cgi-bin/analysis.cgi?id=pha001881</a> |
| Aging | BoneAging              | ShaftZ1R           | Hip geometry (Shaft Section Modulus), multivariable adjusted                         | <a href="http://www.ncbi.nlm.nih.gov/projects/gap/cgi-bin/analysis.cgi?id=pha001883">http://www.ncbi.nlm.nih.gov/projects/gap/cgi-bin/analysis.cgi?id=pha001883</a> |
| Aging | BoneAging              | ShaftZ1rf          | Hip geometry (Shaft Section Modulus, Women), multivariable adjusted                  | <a href="http://www.ncbi.nlm.nih.gov/projects/gap/cgi-bin/analysis.cgi?id=pha001885">http://www.ncbi.nlm.nih.gov/projects/gap/cgi-bin/analysis.cgi?id=pha001885</a> |
| Aging | BoneAging              | ShaftZ1rm          | Hip geometry (Shaft Section Modulus, Men), multivariable adjusted                    | <a href="http://www.ncbi.nlm.nih.gov/projects/gap/cgi-bin/analysis.cgi?id=pha001887">http://www.ncbi.nlm.nih.gov/projects/gap/cgi-bin/analysis.cgi?id=pha001887</a> |
| Aging | BoneAging              | SOS                | Bone Ultrasound speed measured by QUS, multivariable adjusted                        | <a href="http://www.ncbi.nlm.nih.gov/projects/gap/cgi-bin/analysis.cgi?id=pha001783">http://www.ncbi.nlm.nih.gov/projects/gap/cgi-bin/analysis.cgi?id=pha001783</a> |
| Aging | BoneAging              | TRBMD              | Trochanter BMD measured by DXA, multivariable adjusted                               | <a href="http://www.ncbi.nlm.nih.gov/projects/gap/cgi-bin/analysis.cgi?id=pha001785">http://www.ncbi.nlm.nih.gov/projects/gap/cgi-bin/analysis.cgi?id=pha001785</a> |
| Aging | BoneAging              | TRBMDf             | Troch Neck BMD measured by DXA (Women), multivariable adjusted                       | <a href="http://www.ncbi.nlm.nih.gov/projects/gap/cgi-bin/analysis.cgi?id=pha001889">http://www.ncbi.nlm.nih.gov/projects/gap/cgi-bin/analysis.cgi?id=pha001889</a> |
| Aging | BoneAging              | TRBMDm             | Troch Neck BMD measured by DXA (Men), multivariable adjusted                         | <a href="http://www.ncbi.nlm.nih.gov/projects/gap/cgi-bin/analysis.cgi?id=pha001891">http://www.ncbi.nlm.nih.gov/projects/gap/cgi-bin/analysis.cgi?id=pha001891</a> |
| Aging | BrainMRI               | AFBV               | Frontal lobe to intracranial volume ratio, multivariable adjusted                    | <a href="http://www.ncbi.nlm.nih.gov/projects/gap/cgi-bin/analysis.cgi?id=pha001893">http://www.ncbi.nlm.nih.gov/projects/gap/cgi-bin/analysis.cgi?id=pha001893</a> |
| Aging | BrainMRI               | AHPV               | Hippocampal to intracranial volume ratio, multivariable adjusted                     | <a href="http://www.ncbi.nlm.nih.gov/projects/gap/cgi-bin/analysis.cgi?id=pha001895">http://www.ncbi.nlm.nih.gov/projects/gap/cgi-bin/analysis.cgi?id=pha001895</a> |
| Aging | BrainMRI               | AHPVapoe1          | Hippocampal to intracranial volume ratio, multivariable with APOE                    | <a href="http://www.ncbi.nlm.nih.gov/projects/gap/cgi-bin/analysis.cgi?id=pha001929">http://www.ncbi.nlm.nih.gov/projects/gap/cgi-bin/analysis.cgi?id=pha001929</a> |
| Aging | BrainMRI               | AHPVr              | Hippocampal to total cerebral volume ratio, multivariable adjusted                   | <a href="http://www.ncbi.nlm.nih.gov/projects/gap/cgi-bin/analysis.cgi?id=pha001897">http://www.ncbi.nlm.nih.gov/projects/gap/cgi-bin/analysis.cgi?id=pha001897</a> |
| Aging | BrainMRI               | AHPVrapoe1         | Hippocampal to total cerebral volume ratio, multivariable with APOE                  | <a href="http://www.ncbi.nlm.nih.gov/projects/gap/cgi-bin/analysis.cgi?id=pha001931">http://www.ncbi.nlm.nih.gov/projects/gap/cgi-bin/analysis.cgi?id=pha001931</a> |
| Aging | BrainMRI               | ALLV               | Log lateral ventricular to intracranial volume ratio, multivariable adjusted         | <a href="http://www.ncbi.nlm.nih.gov/projects/gap/cgi-bin/analysis.cgi?id=pha001899">http://www.ncbi.nlm.nih.gov/projects/gap/cgi-bin/analysis.cgi?id=pha001899</a> |
| Aging | BrainMRI               | ALTHBV             | Log temporal horn to intracranial volume ratio, multivariable adjusted               | <a href="http://www.ncbi.nlm.nih.gov/projects/gap/cgi-bin/analysis.cgi?id=pha001901">http://www.ncbi.nlm.nih.gov/projects/gap/cgi-bin/analysis.cgi?id=pha001901</a> |
| Aging | BrainMRI               | ALWMMHIVapoe1      | Log white matter hyperintensity to cranial ratio, multivariable with APOE            | <a href="http://www.ncbi.nlm.nih.gov/projects/gap/cgi-bin/analysis.cgi?id=pha001933">http://www.ncbi.nlm.nih.gov/projects/gap/cgi-bin/analysis.cgi?id=pha001933</a> |
| Aging | BrainMRI               | AOBV               | Occipital lobe to intracranial volume ratio, multivariable adjusted                  | <a href="http://www.ncbi.nlm.nih.gov/projects/gap/cgi-bin/analysis.cgi?id=pha001903">http://www.ncbi.nlm.nih.gov/projects/gap/cgi-bin/analysis.cgi?id=pha001903</a> |
| Aging | BrainMRI               | APBV               | Parietal lobe to intracranial volume ratio, multivariable adjusted                   | <a href="http://www.ncbi.nlm.nih.gov/projects/gap/cgi-bin/analysis.cgi?id=pha001905">http://www.ncbi.nlm.nih.gov/projects/gap/cgi-bin/analysis.cgi?id=pha001905</a> |
| Aging | BrainMRI               | ATBV               | Temporal lobe to intracranial volume ratio, multivariable adjusted                   | <a href="http://www.ncbi.nlm.nih.gov/projects/gap/cgi-bin/analysis.cgi?id=pha001907">http://www.ncbi.nlm.nih.gov/projects/gap/cgi-bin/analysis.cgi?id=pha001907</a> |
| Aging | BrainMRI               | ATCBV              | Total cerebral brain to intracranial volume ratio, multivariable adjusted            | <a href="http://www.ncbi.nlm.nih.gov/projects/gap/cgi-bin/analysis.cgi?id=pha001909">http://www.ncbi.nlm.nih.gov/projects/gap/cgi-bin/analysis.cgi?id=pha001909</a> |
| Aging | BrainMRI               | ATCBVapoe1         | Total cerebral brain to intracranial volume ratio, multivariable with APOE           | <a href="http://www.ncbi.nlm.nih.gov/projects/gap/cgi-bin/analysis.cgi?id=pha001935">http://www.ncbi.nlm.nih.gov/projects/gap/cgi-bin/analysis.cgi?id=pha001935</a> |
| Aging | BrainMRI               | CFBV               | Frontal lobe to intracranial volume ratio, age and sex adjusted                      | <a href="http://www.ncbi.nlm.nih.gov/projects/gap/cgi-bin/analysis.cgi?id=pha001911">http://www.ncbi.nlm.nih.gov/projects/gap/cgi-bin/analysis.cgi?id=pha001911</a> |
| Aging | BrainMRI               | CHPV               | Hippocampal to intracranial volume ratio, age and sex adjusted                       | <a href="http://www.ncbi.nlm.nih.gov/projects/gap/cgi-bin/analysis.cgi?id=pha001913">http://www.ncbi.nlm.nih.gov/projects/gap/cgi-bin/analysis.cgi?id=pha001913</a> |
| Aging | BrainMRI               | CHPVr              | Hippocampal to total cerebral volume ratio, age and sex adjusted                     | <a href="http://www.ncbi.nlm.nih.gov/projects/gap/cgi-bin/analysis.cgi?id=pha001915">http://www.ncbi.nlm.nih.gov/projects/gap/cgi-bin/analysis.cgi?id=pha001915</a> |
| Aging | BrainMRI               | CLLV               | Log lateral ventricular to intracranial volume ratio, age and sex adjusted           | <a href="http://www.ncbi.nlm.nih.gov/projects/gap/cgi-bin/analysis.cgi?id=pha001917">http://www.ncbi.nlm.nih.gov/projects/gap/cgi-bin/analysis.cgi?id=pha001917</a> |
| Aging | BrainMRI               | CLTHBV             | Log temporal horn to intracranial volume ratio, age and sex adjusted                 | <a href="http://www.ncbi.nlm.nih.gov/projects/gap/cgi-bin/analysis.cgi?id=pha001919">http://www.ncbi.nlm.nih.gov/projects/gap/cgi-bin/analysis.cgi?id=pha001919</a> |
| Aging | BrainMRI               | COBV               | Occipital lobe to intracranial volume ratio, age and sex adjusted                    | <a href="http://www.ncbi.nlm.nih.gov/projects/gap/cgi-bin/analysis.cgi?id=pha001921">http://www.ncbi.nlm.nih.gov/projects/gap/cgi-bin/analysis.cgi?id=pha001921</a> |
| Aging | BrainMRI               | CPBV               | Parietal lobe to intracranial volume ratio, age and sex adjusted                     | <a href="http://www.ncbi.nlm.nih.gov/projects/gap/cgi-bin/analysis.cgi?id=pha001923">http://www.ncbi.nlm.nih.gov/projects/gap/cgi-bin/analysis.cgi?id=pha001923</a> |
| Aging | BrainMRI               | CTBV               | Temporal lobe to intracranial volume ratio, age and sex adjusted                     | <a href="http://www.ncbi.nlm.nih.gov/projects/gap/cgi-bin/analysis.cgi?id=pha001925">http://www.ncbi.nlm.nih.gov/projects/gap/cgi-bin/analysis.cgi?id=pha001925</a> |
| Aging | BrainMRI               | CTCBV              | Total cerebral brain to intracranial volume ratio, age and sex adjusted              | <a href="http://www.ncbi.nlm.nih.gov/projects/gap/cgi-bin/analysis.cgi?id=pha001927">http://www.ncbi.nlm.nih.gov/projects/gap/cgi-bin/analysis.cgi?id=pha001927</a> |
| Aging | CognitiveFunction      | F1                 | Visual memory composite score, multivariable adjusted                                | <a href="http://www.ncbi.nlm.nih.gov/projects/gap/cgi-bin/analysis.cgi?id=pha001937">http://www.ncbi.nlm.nih.gov/projects/gap/cgi-bin/analysis.cgi?id=pha001937</a> |
| Aging | CognitiveFunction      | F2                 | Visuospatial memory & organization, multivariable adjusted                           | <a href="http://www.ncbi.nlm.nih.gov/projects/gap/cgi-bin/analysis.cgi?id=pha001939">http://www.ncbi.nlm.nih.gov/projects/gap/cgi-bin/analysis.cgi?id=pha001939</a> |
| Aging | CognitiveFunction      | F3                 | Visual scanning & motor speed, multivariable adjusted                                | <a href="http://www.ncbi.nlm.nih.gov/projects/gap/cgi-bin/analysis.cgi?id=pha001941">http://www.ncbi.nlm.nih.gov/projects/gap/cgi-bin/analysis.cgi?id=pha001941</a> |
| Aging | CognitiveFunction      | MMSE5MVX           | MMSE score, offspring exam 5, multivariable- adjusted                                | <a href="http://www.ncbi.nlm.nih.gov/projects/gap/cgi-bin/analysis.cgi?id=pha001949">http://www.ncbi.nlm.nih.gov/projects/gap/cgi-bin/analysis.cgi?id=pha001949</a> |
| Aging | CognitiveFunction      | MMSE5to7MVX        | average MMSE score, offspring exams 5 & 7, multivariable-adjusted                    | <a href="http://www.ncbi.nlm.nih.gov/projects/gap/cgi-bin/analysis.cgi?id=pha001951">http://www.ncbi.nlm.nih.gov/projects/gap/cgi-bin/analysis.cgi?id=pha001951</a> |
| Aging | CognitiveFunction      | MMSE5to7X          | average MMSE score, offspring exam 5 & 7, age-adjusted                               | <a href="http://www.ncbi.nlm.nih.gov/projects/gap/cgi-bin/analysis.cgi?id=pha001953">http://www.ncbi.nlm.nih.gov/projects/gap/cgi-bin/analysis.cgi?id=pha001953</a> |
| Aging | CognitiveFunction      | MMSE5X             | MMSE score, offspring exam 5, age-adjusted                                           | <a href="http://www.ncbi.nlm.nih.gov/projects/gap/cgi-bin/analysis.cgi?id=pha001955">http://www.ncbi.nlm.nih.gov/projects/gap/cgi-bin/analysis.cgi?id=pha001955</a> |
| Aging | CognitiveFunction      | MMSE65MVX          | MMSE score at age 65, offspring & cohort pooled, multivariable-adjusted              | <a href="http://www.ncbi.nlm.nih.gov/projects/gap/cgi-bin/analysis.cgi?id=pha001957">http://www.ncbi.nlm.nih.gov/projects/gap/cgi-bin/analysis.cgi?id=pha001957</a> |
| Aging | CognitiveFunction      | MMSE65X            | MMSE score at age 65, offspring & cohort pooled, birth cohort-adjusted               | <a href="http://www.ncbi.nlm.nih.gov/projects/gap/cgi-bin/analysis.cgi?id=pha001959">http://www.ncbi.nlm.nih.gov/projects/gap/cgi-bin/analysis.cgi?id=pha001959</a> |
| Aging | CognitiveFunction      | MMSE7MV            | MMSE score, offspring exam 7, multivariable- adjusted                                | <a href="http://www.ncbi.nlm.nih.gov/projects/gap/cgi-bin/analysis.cgi?id=pha002836">http://www.ncbi.nlm.nih.gov/projects/gap/cgi-bin/analysis.cgi?id=pha002836</a> |
| Aging | CognitiveFunction      | MMSE7X             | MMSE score, offspring exam 7, age-adjusted                                           | <a href="http://www.ncbi.nlm.nih.gov/projects/gap/cgi-bin/analysis.cgi?id=pha001961">http://www.ncbi.nlm.nih.gov/projects/gap/cgi-bin/analysis.cgi?id=pha001961</a> |
| Aging | CognitiveFunction      | Nam                | Boston Naming Test score without cues, multivariable adjusted                        | <a href="http://www.ncbi.nlm.nih.gov/projects/gap/cgi-bin/analysis.cgi?id=pha001943">http://www.ncbi.nlm.nih.gov/projects/gap/cgi-bin/analysis.cgi?id=pha001943</a> |
| Aging | CognitiveFunction      | Sim                | Similarities raw score, multivariable adjusted                                       | <a href="http://www.ncbi.nlm.nih.gov/projects/gap/cgi-bin/analysis.cgi?id=pha001945">http://www.ncbi.nlm.nih.gov/projects/gap/cgi-bin/analysis.cgi?id=pha001945</a> |
| Aging | CognitiveFunction      | WRAT               | Wide Range Achievement Test, multivariable adjusted                                  | <a href="http://www.ncbi.nlm.nih.gov/projects/gap/cgi-bin/analysis.cgi?id=pha001947">http://www.ncbi.nlm.nih.gov/projects/gap/cgi-bin/analysis.cgi?id=pha001947</a> |
| Aging | Hearing                | SPTA               | Pure tone audiometry average over medium frequencies, age and sex adjusted           | <a href="http://www.ncbi.nlm.nih.gov/projects/gap/cgi-bin/analysis.cgi?id=pha001963">http://www.ncbi.nlm.nih.gov/projects/gap/cgi-bin/analysis.cgi?id=pha001963</a> |
| Aging | Hearing                | SPTAHI             | Pure tone audiometry average over high frequencies, age and sex adjusted             | <a href="http://www.ncbi.nlm.nih.gov/projects/gap/cgi-bin/analysis.cgi?id=pha001965">http://www.ncbi.nlm.nih.gov/projects/gap/cgi-bin/analysis.cgi?id=pha001965</a> |
| Aging | Hearing                | SPTALO             | Pure tone audiometry average over low frequencies, age and sex adjusted              | <a href="http://www.ncbi.nlm.nih.gov/projects/gap/cgi-bin/analysis.cgi?id=pha001967">http://www.ncbi.nlm.nih.gov/projects/gap/cgi-bin/analysis.cgi?id=pha001967</a> |
| Aging | Morbidity-freesurvival | Morbidityfree65MVX | morbidity-free survival at age 65, offspring & cohort pooled, multivariable-adjusted | <a href="http://www.ncbi.nlm.nih.gov/projects/gap/cgi-bin/analysis.cgi?id=pha001969">http://www.ncbi.nlm.nih.gov/projects/gap/cgi-bin/analysis.cgi?id=pha001969</a> |
| Aging | Morbidity-freesurvival | Morbidityfree65X   | morbidity-free survival at age 65, offspring & cohort pooled, birth cohort- adjusted | <a href="http://www.ncbi.nlm.nih.gov/projects/gap/cgi-bin/analysis.cgi?id=pha001971">http://www.ncbi.nlm.nih.gov/projects/gap/cgi-bin/analysis.cgi?id=pha001971</a> |
| Aging | PhysicalDisability     | Handgrip727X       | hand grip, offspring exam 7 & cohort exam 27                                         | <a href="http://www.ncbi.nlm.nih.gov/projects/gap/cgi-bin/analysis.cgi?id=pha001977">http://www.ncbi.nlm.nih.gov/projects/gap/cgi-bin/analysis.cgi?id=pha001977</a> |
| Aging | PhysicalDisability     | Handgrip7X         | hand grip, offspring exam 7                                                          | <a href="http://www.ncbi.nlm.nih.gov/projects/gap/cgi-bin/analysis.cgi?id=pha001979">http://www.ncbi.nlm.nih.gov/projects/gap/cgi-bin/analysis.cgi?id=pha001979</a> |
| Aging | PhysicalDisability     | Walkingspeed727X   | walking speed, offspring exam 7 & cohort exam 27                                     | <a href="http://www.ncbi.nlm.nih.gov/projects/gap/cgi-bin/analysis.cgi?id=pha001981">http://www.ncbi.nlm.nih.gov/projects/gap/cgi-bin/analysis.cgi?id=pha001981</a> |
| Aging | PhysicalDisability     | Walkingspeed7X     | walking speed, offspring exam 7                                                      | <a href="http://www.ncbi.nlm.nih.gov/projects/gap/cgi-bin/analysis.cgi?id=pha001983">http://www.ncbi.nlm.nih.gov/projects/gap/cgi-bin/analysis.cgi?id=pha001983</a> |
| Aging | ReproductiveTraits     | MenoageMVX         | age at natural menopause, adjusted                                                   | <a href="http://www.ncbi.nlm.nih.gov/projects/gap/cgi-bin/analysis.cgi?id=pha001985">http://www.ncbi.nlm.nih.gov/projects/gap/cgi-bin/analysis.cgi?id=pha001985</a> |
| Aging | ReproductiveTraits     | MenoageX           | age at natural menopause, crude                                                      | <a href="http://www.ncbi.nlm.nih.gov/projects/gap/cgi-bin/analysis.cgi?id=pha001987">http://www.ncbi.nlm.nih.gov/projects/gap/cgi-bin/analysis.cgi?id=pha001987</a> |
| Aging | Survival               | DeathageMV         | age at death, offspring & cohort pooled, multivariable-adjusted                      | <a href="http://www.ncbi.nlm.nih.gov/projects/gap/cgi-bin/analysis.cgi?id=pha001989">http://www.ncbi.nlm.nih.gov/projects/gap/cgi-bin/analysis.cgi?id=pha001989</a> |

Online Table 2: Phenotypes Evaluated for Association using Family-based Analysis (FBAT)

| Group         | Category         | Trait Label    | Name                                                                                  | FBAT Link                                                                                                                                                           |
|---------------|------------------|----------------|---------------------------------------------------------------------------------------|---------------------------------------------------------------------------------------------------------------------------------------------------------------------|
| Aging         | Survival         | DeathageX      | age at death, offspring & cohort pooled, adjusted for birth cohort                    | <a href="http://www.ncbi.nlm.nih.gov/projects/gap/cgi-bin/analysis.cgi?id=pha001991">http://www.ncbi.nlm.nih.gov/projects/gap/cgi-bin/analysis.cgi?id=pha001991</a> |
| Aging         | Survival         | DeathpastALEMV | death past average life expectancy, offspring & cohort pooled, multivariable-adjusted | <a href="http://www.ncbi.nlm.nih.gov/projects/gap/cgi-bin/analysis.cgi?id=pha001993">http://www.ncbi.nlm.nih.gov/projects/gap/cgi-bin/analysis.cgi?id=pha001993</a> |
| Aging         | Survival         | DeathpastALEX  | death past average life expectancy, offspring & cohort pooled, birth cohort adjusted  | <a href="http://www.ncbi.nlm.nih.gov/projects/gap/cgi-bin/analysis.cgi?id=pha001995">http://www.ncbi.nlm.nih.gov/projects/gap/cgi-bin/analysis.cgi?id=pha001995</a> |
| BloodPressure | Bloodpressure    | DBP17AVGIMPAS  | diastolic BP average age-sex-adjusted residual exams 1-7                              | <a href="http://www.ncbi.nlm.nih.gov/projects/gap/cgi-bin/analysis.cgi?id=pha001417">http://www.ncbi.nlm.nih.gov/projects/gap/cgi-bin/analysis.cgi?id=pha001417</a> |
| BloodPressure | Bloodpressure    | DBP17AVGIMPMV  | diastolic BP average multivariable-adjusted residual exams 1-7                        | <a href="http://www.ncbi.nlm.nih.gov/projects/gap/cgi-bin/analysis.cgi?id=pha001419">http://www.ncbi.nlm.nih.gov/projects/gap/cgi-bin/analysis.cgi?id=pha001419</a> |
| BloodPressure | Bloodpressure    | DBP1IMPMEANAS  | diastolic BP exam 1, age- sex- adjusted                                               | <a href="http://www.ncbi.nlm.nih.gov/projects/gap/cgi-bin/analysis.cgi?id=pha001421">http://www.ncbi.nlm.nih.gov/projects/gap/cgi-bin/analysis.cgi?id=pha001421</a> |
| BloodPressure | Bloodpressure    | DBP1IMPMEANMV  | diastolic BP exam 1, multivariable-adjusted                                           | <a href="http://www.ncbi.nlm.nih.gov/projects/gap/cgi-bin/analysis.cgi?id=pha001423">http://www.ncbi.nlm.nih.gov/projects/gap/cgi-bin/analysis.cgi?id=pha001423</a> |
| BloodPressure | Bloodpressure    | DBP2IMPMEANAS  | diastolic BP exam 2, age- sex- adjusted                                               | <a href="http://www.ncbi.nlm.nih.gov/projects/gap/cgi-bin/analysis.cgi?id=pha001425">http://www.ncbi.nlm.nih.gov/projects/gap/cgi-bin/analysis.cgi?id=pha001425</a> |
| BloodPressure | Bloodpressure    | DBP2IMPMEANMV  | diastolic BP exam 2, multivariable-adjusted                                           | <a href="http://www.ncbi.nlm.nih.gov/projects/gap/cgi-bin/analysis.cgi?id=pha001427">http://www.ncbi.nlm.nih.gov/projects/gap/cgi-bin/analysis.cgi?id=pha001427</a> |
| BloodPressure | Bloodpressure    | DBP3IMPMEANAS  | diastolic BP exam 3, age- sex- adjusted                                               | <a href="http://www.ncbi.nlm.nih.gov/projects/gap/cgi-bin/analysis.cgi?id=pha001429">http://www.ncbi.nlm.nih.gov/projects/gap/cgi-bin/analysis.cgi?id=pha001429</a> |
| BloodPressure | Bloodpressure    | DBP3IMPMEANMV  | diastolic BP exam 3, multivariable-adjusted                                           | <a href="http://www.ncbi.nlm.nih.gov/projects/gap/cgi-bin/analysis.cgi?id=pha001431">http://www.ncbi.nlm.nih.gov/projects/gap/cgi-bin/analysis.cgi?id=pha001431</a> |
| BloodPressure | Bloodpressure    | DBP4IMPMEANAS  | diastolic BP exam 4, age- sex- adjusted                                               | <a href="http://www.ncbi.nlm.nih.gov/projects/gap/cgi-bin/analysis.cgi?id=pha001433">http://www.ncbi.nlm.nih.gov/projects/gap/cgi-bin/analysis.cgi?id=pha001433</a> |
| BloodPressure | Bloodpressure    | DBP4IMPMEANMV  | diastolic BP exam 4, multivariable-adjusted                                           | <a href="http://www.ncbi.nlm.nih.gov/projects/gap/cgi-bin/analysis.cgi?id=pha001435">http://www.ncbi.nlm.nih.gov/projects/gap/cgi-bin/analysis.cgi?id=pha001435</a> |
| BloodPressure | Bloodpressure    | DBP5IMPMEANAS  | diastolic BP exam 5, age- sex- adjusted                                               | <a href="http://www.ncbi.nlm.nih.gov/projects/gap/cgi-bin/analysis.cgi?id=pha001437">http://www.ncbi.nlm.nih.gov/projects/gap/cgi-bin/analysis.cgi?id=pha001437</a> |
| BloodPressure | Bloodpressure    | DBP5IMPMEANMV  | diastolic BP exam 5, multivariable-adjusted                                           | <a href="http://www.ncbi.nlm.nih.gov/projects/gap/cgi-bin/analysis.cgi?id=pha001439">http://www.ncbi.nlm.nih.gov/projects/gap/cgi-bin/analysis.cgi?id=pha001439</a> |
| BloodPressure | Bloodpressure    | DBP6IMPMEANAS  | diastolic BP exam 6, age- sex- adjusted                                               | <a href="http://www.ncbi.nlm.nih.gov/projects/gap/cgi-bin/analysis.cgi?id=pha001441">http://www.ncbi.nlm.nih.gov/projects/gap/cgi-bin/analysis.cgi?id=pha001441</a> |
| BloodPressure | Bloodpressure    | DBP6IMPMEANMV  | diastolic BP exam 6, multivariable-adjusted                                           | <a href="http://www.ncbi.nlm.nih.gov/projects/gap/cgi-bin/analysis.cgi?id=pha001443">http://www.ncbi.nlm.nih.gov/projects/gap/cgi-bin/analysis.cgi?id=pha001443</a> |
| BloodPressure | Bloodpressure    | DBP7IMPMEANAS  | diastolic BP exam 7, age- sex- adjusted                                               | <a href="http://www.ncbi.nlm.nih.gov/projects/gap/cgi-bin/analysis.cgi?id=pha001445">http://www.ncbi.nlm.nih.gov/projects/gap/cgi-bin/analysis.cgi?id=pha001445</a> |
| BloodPressure | Bloodpressure    | DBP7IMPMEANMV  | diastolic BP exam 7, multivariable-adjusted                                           | <a href="http://www.ncbi.nlm.nih.gov/projects/gap/cgi-bin/analysis.cgi?id=pha001447">http://www.ncbi.nlm.nih.gov/projects/gap/cgi-bin/analysis.cgi?id=pha001447</a> |
| BloodPressure | Bloodpressure    | PP17AVGIMPAS   | pulse pressure average age-sex-adjusted residual exams 1-7                            | <a href="http://www.ncbi.nlm.nih.gov/projects/gap/cgi-bin/analysis.cgi?id=pha001449">http://www.ncbi.nlm.nih.gov/projects/gap/cgi-bin/analysis.cgi?id=pha001449</a> |
| BloodPressure | Bloodpressure    | PP17AVGIMPMV   | pulse pressure average multivariable-adjusted residual exams 1-7                      | <a href="http://www.ncbi.nlm.nih.gov/projects/gap/cgi-bin/analysis.cgi?id=pha001451">http://www.ncbi.nlm.nih.gov/projects/gap/cgi-bin/analysis.cgi?id=pha001451</a> |
| BloodPressure | Bloodpressure    | PP1IMPMEANAS   | pulse pressure exam 1, age- sex- adjusted                                             | <a href="http://www.ncbi.nlm.nih.gov/projects/gap/cgi-bin/analysis.cgi?id=pha001453">http://www.ncbi.nlm.nih.gov/projects/gap/cgi-bin/analysis.cgi?id=pha001453</a> |
| BloodPressure | Bloodpressure    | PP1IMPMEANMV   | pulse pressure exam 1, multivariable- adjusted                                        | <a href="http://www.ncbi.nlm.nih.gov/projects/gap/cgi-bin/analysis.cgi?id=pha001455">http://www.ncbi.nlm.nih.gov/projects/gap/cgi-bin/analysis.cgi?id=pha001455</a> |
| BloodPressure | Bloodpressure    | PP2IMPMEANAS   | pulse pressure exam 2, age- sex- adjusted                                             | <a href="http://www.ncbi.nlm.nih.gov/projects/gap/cgi-bin/analysis.cgi?id=pha001457">http://www.ncbi.nlm.nih.gov/projects/gap/cgi-bin/analysis.cgi?id=pha001457</a> |
| BloodPressure | Bloodpressure    | PP2IMPMEANMV   | pulse pressure exam 2, multivariable- adjusted                                        | <a href="http://www.ncbi.nlm.nih.gov/projects/gap/cgi-bin/analysis.cgi?id=pha001459">http://www.ncbi.nlm.nih.gov/projects/gap/cgi-bin/analysis.cgi?id=pha001459</a> |
| BloodPressure | Bloodpressure    | PP3IMPMEANAS   | pulse pressure exam 3, age- sex- adjusted                                             | <a href="http://www.ncbi.nlm.nih.gov/projects/gap/cgi-bin/analysis.cgi?id=pha001461">http://www.ncbi.nlm.nih.gov/projects/gap/cgi-bin/analysis.cgi?id=pha001461</a> |
| BloodPressure | Bloodpressure    | PP3IMPMEANMV   | pulse pressure exam 3, multivariable- adjusted                                        | <a href="http://www.ncbi.nlm.nih.gov/projects/gap/cgi-bin/analysis.cgi?id=pha001463">http://www.ncbi.nlm.nih.gov/projects/gap/cgi-bin/analysis.cgi?id=pha001463</a> |
| BloodPressure | Bloodpressure    | PP4IMPMEANAS   | pulse pressure exam 4, age- sex- adjusted                                             | <a href="http://www.ncbi.nlm.nih.gov/projects/gap/cgi-bin/analysis.cgi?id=pha001465">http://www.ncbi.nlm.nih.gov/projects/gap/cgi-bin/analysis.cgi?id=pha001465</a> |
| BloodPressure | Bloodpressure    | PP4IMPMEANMV   | pulse pressure exam 4, multivariable- adjusted                                        | <a href="http://www.ncbi.nlm.nih.gov/projects/gap/cgi-bin/analysis.cgi?id=pha001467">http://www.ncbi.nlm.nih.gov/projects/gap/cgi-bin/analysis.cgi?id=pha001467</a> |
| BloodPressure | Bloodpressure    | PP5IMPMEANAS   | pulse pressure exam 5, age- sex- adjusted                                             | <a href="http://www.ncbi.nlm.nih.gov/projects/gap/cgi-bin/analysis.cgi?id=pha001469">http://www.ncbi.nlm.nih.gov/projects/gap/cgi-bin/analysis.cgi?id=pha001469</a> |
| BloodPressure | Bloodpressure    | PP5IMPMEANMV   | pulse pressure exam 5, multivariable- adjusted                                        | <a href="http://www.ncbi.nlm.nih.gov/projects/gap/cgi-bin/analysis.cgi?id=pha001471">http://www.ncbi.nlm.nih.gov/projects/gap/cgi-bin/analysis.cgi?id=pha001471</a> |
| BloodPressure | Bloodpressure    | PP6IMPMEANAS   | pulse pressure exam 6, age- sex- adjusted                                             | <a href="http://www.ncbi.nlm.nih.gov/projects/gap/cgi-bin/analysis.cgi?id=pha001473">http://www.ncbi.nlm.nih.gov/projects/gap/cgi-bin/analysis.cgi?id=pha001473</a> |
| BloodPressure | Bloodpressure    | PP6IMPMEANMV   | pulse pressure exam 6, multivariable- adjusted                                        | <a href="http://www.ncbi.nlm.nih.gov/projects/gap/cgi-bin/analysis.cgi?id=pha001475">http://www.ncbi.nlm.nih.gov/projects/gap/cgi-bin/analysis.cgi?id=pha001475</a> |
| BloodPressure | Bloodpressure    | PP7IMPMEANAS   | pulse pressure exam 7, age- sex- adjusted                                             | <a href="http://www.ncbi.nlm.nih.gov/projects/gap/cgi-bin/analysis.cgi?id=pha001477">http://www.ncbi.nlm.nih.gov/projects/gap/cgi-bin/analysis.cgi?id=pha001477</a> |
| BloodPressure | Bloodpressure    | PP7IMPMEANMV   | pulse pressure exam 7, multivariable- adjusted                                        | <a href="http://www.ncbi.nlm.nih.gov/projects/gap/cgi-bin/analysis.cgi?id=pha001479">http://www.ncbi.nlm.nih.gov/projects/gap/cgi-bin/analysis.cgi?id=pha001479</a> |
| BloodPressure | Bloodpressure    | SBP17AVGIMPAS  | systolic BP average age-sex-adjusted residual exams 1-7                               | <a href="http://www.ncbi.nlm.nih.gov/projects/gap/cgi-bin/analysis.cgi?id=pha001481">http://www.ncbi.nlm.nih.gov/projects/gap/cgi-bin/analysis.cgi?id=pha001481</a> |
| BloodPressure | Bloodpressure    | SBP17AVGIMPMV  | systolic BP average multivariable-adjusted residual exams 1-7                         | <a href="http://www.ncbi.nlm.nih.gov/projects/gap/cgi-bin/analysis.cgi?id=pha001483">http://www.ncbi.nlm.nih.gov/projects/gap/cgi-bin/analysis.cgi?id=pha001483</a> |
| BloodPressure | Bloodpressure    | SBP1IMPMEANAS  | systolic BP exam 1, age- sex- adjusted                                                | <a href="http://www.ncbi.nlm.nih.gov/projects/gap/cgi-bin/analysis.cgi?id=pha001485">http://www.ncbi.nlm.nih.gov/projects/gap/cgi-bin/analysis.cgi?id=pha001485</a> |
| BloodPressure | Bloodpressure    | SBP1IMPMEANMV  | systolic BP exam 1, multivariable-adjusted                                            | <a href="http://www.ncbi.nlm.nih.gov/projects/gap/cgi-bin/analysis.cgi?id=pha001487">http://www.ncbi.nlm.nih.gov/projects/gap/cgi-bin/analysis.cgi?id=pha001487</a> |
| BloodPressure | Bloodpressure    | SBP2IMPMEANAS  | systolic BP exam 2, age- sex- adjusted                                                | <a href="http://www.ncbi.nlm.nih.gov/projects/gap/cgi-bin/analysis.cgi?id=pha001489">http://www.ncbi.nlm.nih.gov/projects/gap/cgi-bin/analysis.cgi?id=pha001489</a> |
| BloodPressure | Bloodpressure    | SBP2IMPMEANMV  | systolic BP exam 2, multivariable-adjusted                                            | <a href="http://www.ncbi.nlm.nih.gov/projects/gap/cgi-bin/analysis.cgi?id=pha001491">http://www.ncbi.nlm.nih.gov/projects/gap/cgi-bin/analysis.cgi?id=pha001491</a> |
| BloodPressure | Bloodpressure    | SBP3IMPMEANAS  | systolic BP exam 3, age- sex- adjusted                                                | <a href="http://www.ncbi.nlm.nih.gov/projects/gap/cgi-bin/analysis.cgi?id=pha001493">http://www.ncbi.nlm.nih.gov/projects/gap/cgi-bin/analysis.cgi?id=pha001493</a> |
| BloodPressure | Bloodpressure    | SBP3IMPMEANMV  | systolic BP exam 3, multivariable-adjusted                                            | <a href="http://www.ncbi.nlm.nih.gov/projects/gap/cgi-bin/analysis.cgi?id=pha001495">http://www.ncbi.nlm.nih.gov/projects/gap/cgi-bin/analysis.cgi?id=pha001495</a> |
| BloodPressure | Bloodpressure    | SBP4IMPMEANAS  | systolic BP exam 4, age- sex- adjusted                                                | <a href="http://www.ncbi.nlm.nih.gov/projects/gap/cgi-bin/analysis.cgi?id=pha001497">http://www.ncbi.nlm.nih.gov/projects/gap/cgi-bin/analysis.cgi?id=pha001497</a> |
| BloodPressure | Bloodpressure    | SBP4IMPMEANMV  | systolic BP exam 4, multivariable-adjusted                                            | <a href="http://www.ncbi.nlm.nih.gov/projects/gap/cgi-bin/analysis.cgi?id=pha001499">http://www.ncbi.nlm.nih.gov/projects/gap/cgi-bin/analysis.cgi?id=pha001499</a> |
| BloodPressure | Bloodpressure    | SBP5IMPMEANAS  | systolic BP exam 5, age- sex- adjusted                                                | <a href="http://www.ncbi.nlm.nih.gov/projects/gap/cgi-bin/analysis.cgi?id=pha001501">http://www.ncbi.nlm.nih.gov/projects/gap/cgi-bin/analysis.cgi?id=pha001501</a> |
| BloodPressure | Bloodpressure    | SBP5IMPMEANMV  | systolic BP exam 5, multivariable-adjusted                                            | <a href="http://www.ncbi.nlm.nih.gov/projects/gap/cgi-bin/analysis.cgi?id=pha001503">http://www.ncbi.nlm.nih.gov/projects/gap/cgi-bin/analysis.cgi?id=pha001503</a> |
| BloodPressure | Bloodpressure    | SBP6IMPMEANAS  | systolic BP exam 6, age- sex- adjusted                                                | <a href="http://www.ncbi.nlm.nih.gov/projects/gap/cgi-bin/analysis.cgi?id=pha001505">http://www.ncbi.nlm.nih.gov/projects/gap/cgi-bin/analysis.cgi?id=pha001505</a> |
| BloodPressure | Bloodpressure    | SBP6IMPMEANMV  | systolic BP exam 6, multivariable-adjusted                                            | <a href="http://www.ncbi.nlm.nih.gov/projects/gap/cgi-bin/analysis.cgi?id=pha001507">http://www.ncbi.nlm.nih.gov/projects/gap/cgi-bin/analysis.cgi?id=pha001507</a> |
| BloodPressure | Bloodpressure    | SBP7IMPMEANAS  | systolic BP exam 7, age- sex- adjusted                                                | <a href="http://www.ncbi.nlm.nih.gov/projects/gap/cgi-bin/analysis.cgi?id=pha001509">http://www.ncbi.nlm.nih.gov/projects/gap/cgi-bin/analysis.cgi?id=pha001509</a> |
| BloodPressure | Bloodpressure    | SBP7IMPMEANMV  | systolic BP exam 7, multivariable-adjusted                                            | <a href="http://www.ncbi.nlm.nih.gov/projects/gap/cgi-bin/analysis.cgi?id=pha001511">http://www.ncbi.nlm.nih.gov/projects/gap/cgi-bin/analysis.cgi?id=pha001511</a> |
| BloodPressure | echocardiography | AOR26AVGAS     | M-mode Echo aortic root diastolic diameter, avg age-sex resid, exams 2,4,5,6          | <a href="http://www.ncbi.nlm.nih.gov/projects/gap/cgi-bin/analysis.cgi?id=pha001513">http://www.ncbi.nlm.nih.gov/projects/gap/cgi-bin/analysis.cgi?id=pha001513</a> |
| BloodPressure | echocardiography | AOR26AVGMV     | M-mode Echo aortic root diastolic diameter, avg multivar resid, exams 2,4,5,6         | <a href="http://www.ncbi.nlm.nih.gov/projects/gap/cgi-bin/analysis.cgi?id=pha001515">http://www.ncbi.nlm.nih.gov/projects/gap/cgi-bin/analysis.cgi?id=pha001515</a> |
| BloodPressure | echocardiography | AOR2AS         | M-mode Echo aortic root diastolic diameter, exam 2, age-sex-adjusted                  | <a href="http://www.ncbi.nlm.nih.gov/projects/gap/cgi-bin/analysis.cgi?id=pha001517">http://www.ncbi.nlm.nih.gov/projects/gap/cgi-bin/analysis.cgi?id=pha001517</a> |
| BloodPressure | echocardiography | AOR2MV         | M-mode Echo aortic root diastolic diameter, exam 2, multivariable-adjusted            | <a href="http://www.ncbi.nlm.nih.gov/projects/gap/cgi-bin/analysis.cgi?id=pha001519">http://www.ncbi.nlm.nih.gov/projects/gap/cgi-bin/analysis.cgi?id=pha001519</a> |
| BloodPressure | echocardiography | AOR4AS         | M-mode Echo aortic root diastolic diameter, exam 4, age-sex-adjusted                  | <a href="http://www.ncbi.nlm.nih.gov/projects/gap/cgi-bin/analysis.cgi?id=pha001521">http://www.ncbi.nlm.nih.gov/projects/gap/cgi-bin/analysis.cgi?id=pha001521</a> |



Online Table 2: Phenotypes Evaluated for Association using Family-based Analysis (FBAT)

| Group         | Category            | Trait Label         | Name                                                                       | FBAT Link                                                                                                                                                           |
|---------------|---------------------|---------------------|----------------------------------------------------------------------------|---------------------------------------------------------------------------------------------------------------------------------------------------------------------|
| BloodPressure | echocardiography    | LVWT26AVGMV         | M-mode Echo LV diastolic wall thickness, avg multivar resid, exams 2,4,5,6 | <a href="http://www.ncbi.nlm.nih.gov/projects/gap/cgi-bin/analysis.cgi?id=pha001635">http://www.ncbi.nlm.nih.gov/projects/gap/cgi-bin/analysis.cgi?id=pha001635</a> |
| BloodPressure | echocardiography    | LVWT2AS             | M-mode Echo LV diastolic wall thickness, exam 2, age-sex-adjusted          | <a href="http://www.ncbi.nlm.nih.gov/projects/gap/cgi-bin/analysis.cgi?id=pha001637">http://www.ncbi.nlm.nih.gov/projects/gap/cgi-bin/analysis.cgi?id=pha001637</a> |
| BloodPressure | echocardiography    | LVWT2MV             | M-mode Echo LV diastolic wall thickness, exam 2, multivariable-adjusted    | <a href="http://www.ncbi.nlm.nih.gov/projects/gap/cgi-bin/analysis.cgi?id=pha001639">http://www.ncbi.nlm.nih.gov/projects/gap/cgi-bin/analysis.cgi?id=pha001639</a> |
| BloodPressure | echocardiography    | LVWT4AS             | M-mode Echo LV diastolic wall thickness, exam 4, age-sex-adjusted          | <a href="http://www.ncbi.nlm.nih.gov/projects/gap/cgi-bin/analysis.cgi?id=pha001641">http://www.ncbi.nlm.nih.gov/projects/gap/cgi-bin/analysis.cgi?id=pha001641</a> |
| BloodPressure | echocardiography    | LVWT4MV             | M-mode Echo LV diastolic wall thickness, exam 4, multivariable-adjusted    | <a href="http://www.ncbi.nlm.nih.gov/projects/gap/cgi-bin/analysis.cgi?id=pha001643">http://www.ncbi.nlm.nih.gov/projects/gap/cgi-bin/analysis.cgi?id=pha001643</a> |
| BloodPressure | echocardiography    | LVWT5AS             | M-mode Echo LV diastolic wall thickness, exam 5, age-sex-adjusted          | <a href="http://www.ncbi.nlm.nih.gov/projects/gap/cgi-bin/analysis.cgi?id=pha001645">http://www.ncbi.nlm.nih.gov/projects/gap/cgi-bin/analysis.cgi?id=pha001645</a> |
| BloodPressure | echocardiography    | LVWT5MV             | M-mode Echo LV diastolic wall thickness, exam 5, multivariable-adjusted    | <a href="http://www.ncbi.nlm.nih.gov/projects/gap/cgi-bin/analysis.cgi?id=pha001647">http://www.ncbi.nlm.nih.gov/projects/gap/cgi-bin/analysis.cgi?id=pha001647</a> |
| BloodPressure | echocardiography    | LVWT6AS             | M-mode Echo LV diastolic wall thickness, exam 6, age-sex-adjusted          | <a href="http://www.ncbi.nlm.nih.gov/projects/gap/cgi-bin/analysis.cgi?id=pha001649">http://www.ncbi.nlm.nih.gov/projects/gap/cgi-bin/analysis.cgi?id=pha001649</a> |
| BloodPressure | echocardiography    | LVWT6MV             | M-mode Echo LV diastolic wall thickness, exam 6, multivariable-adjusted    | <a href="http://www.ncbi.nlm.nih.gov/projects/gap/cgi-bin/analysis.cgi?id=pha001651">http://www.ncbi.nlm.nih.gov/projects/gap/cgi-bin/analysis.cgi?id=pha001651</a> |
| BloodPressure | Endothelialfunction | BASEFLOW7AS         | Brachial artery Baseline flow velocity, exam 7, age-sex-adjusted           | <a href="http://www.ncbi.nlm.nih.gov/projects/gap/cgi-bin/analysis.cgi?id=pha001653">http://www.ncbi.nlm.nih.gov/projects/gap/cgi-bin/analysis.cgi?id=pha001653</a> |
| BloodPressure | Endothelialfunction | BASEFLOW7MV         | Brachial artery Baseline flow velocity, exam 7, multivariable-adjusted     | <a href="http://www.ncbi.nlm.nih.gov/projects/gap/cgi-bin/analysis.cgi?id=pha001655">http://www.ncbi.nlm.nih.gov/projects/gap/cgi-bin/analysis.cgi?id=pha001655</a> |
| BloodPressure | Endothelialfunction | BASELINEDIAMETERAS7 | baseline brachial artery diameter, exam 7, age and sex-adjusted            | <a href="http://www.ncbi.nlm.nih.gov/projects/gap/cgi-bin/analysis.cgi?id=pha001657">http://www.ncbi.nlm.nih.gov/projects/gap/cgi-bin/analysis.cgi?id=pha001657</a> |
| BloodPressure | Endothelialfunction | BASELINEDIAMETERMV7 | baseline brachial artery diameter, exam 7, multivariable-adjusted          | <a href="http://www.ncbi.nlm.nih.gov/projects/gap/cgi-bin/analysis.cgi?id=pha001659">http://www.ncbi.nlm.nih.gov/projects/gap/cgi-bin/analysis.cgi?id=pha001659</a> |
| BloodPressure | Endothelialfunction | FMD7PCTAS           | Brachial artery Flow mediated dilation, exam 7, age-adjusted               | <a href="http://www.ncbi.nlm.nih.gov/projects/gap/cgi-bin/analysis.cgi?id=pha001661">http://www.ncbi.nlm.nih.gov/projects/gap/cgi-bin/analysis.cgi?id=pha001661</a> |
| BloodPressure | Endothelialfunction | FMD7PCTMV           | Brachial artery Flow mediated dilation, exam 7, multivariable-adjusted     | <a href="http://www.ncbi.nlm.nih.gov/projects/gap/cgi-bin/analysis.cgi?id=pha001663">http://www.ncbi.nlm.nih.gov/projects/gap/cgi-bin/analysis.cgi?id=pha001663</a> |
| BloodPressure | Endothelialfunction | HYPERFLOW7AS        | Brachial artery hyperemic flow velocity, exam 7, age-sex-adjusted          | <a href="http://www.ncbi.nlm.nih.gov/projects/gap/cgi-bin/analysis.cgi?id=pha001665">http://www.ncbi.nlm.nih.gov/projects/gap/cgi-bin/analysis.cgi?id=pha001665</a> |
| BloodPressure | Endothelialfunction | HYPERFLOW7MV        | Brachial artery hyperemic flow velocity, exam 7, multivariable-adjusted    | <a href="http://www.ncbi.nlm.nih.gov/projects/gap/cgi-bin/analysis.cgi?id=pha001667">http://www.ncbi.nlm.nih.gov/projects/gap/cgi-bin/analysis.cgi?id=pha001667</a> |
| BloodPressure | ExerciseTest        | ETT2DBPREC3AS       | Exercise recovery 3-min diastolic BP, exam 2, age-sex-adjusted             | <a href="http://www.ncbi.nlm.nih.gov/projects/gap/cgi-bin/analysis.cgi?id=pha001669">http://www.ncbi.nlm.nih.gov/projects/gap/cgi-bin/analysis.cgi?id=pha001669</a> |
| BloodPressure | ExerciseTest        | ETT2DBPREC3MV       | Exercise recovery 3-min diastolic BP, exam 2, multivariable-adjusted       | <a href="http://www.ncbi.nlm.nih.gov/projects/gap/cgi-bin/analysis.cgi?id=pha001671">http://www.ncbi.nlm.nih.gov/projects/gap/cgi-bin/analysis.cgi?id=pha001671</a> |
| BloodPressure | ExerciseTest        | ETT2DBPSTG2AS       | Exercise Stage 2 diastolic BP, exam 2, age-sex-adjusted                    | <a href="http://www.ncbi.nlm.nih.gov/projects/gap/cgi-bin/analysis.cgi?id=pha001673">http://www.ncbi.nlm.nih.gov/projects/gap/cgi-bin/analysis.cgi?id=pha001673</a> |
| BloodPressure | ExerciseTest        | ETT2DBPSTG2MV       | Exercise Stage 2 diastolic BP, exam 2, multivariable-adjusted              | <a href="http://www.ncbi.nlm.nih.gov/projects/gap/cgi-bin/analysis.cgi?id=pha001675">http://www.ncbi.nlm.nih.gov/projects/gap/cgi-bin/analysis.cgi?id=pha001675</a> |
| BloodPressure | ExerciseTest        | ETT2HRREC3AS        | Exercise recovery 3-min heart rate, exam 2, age-sex-adjusted               | <a href="http://www.ncbi.nlm.nih.gov/projects/gap/cgi-bin/analysis.cgi?id=pha001677">http://www.ncbi.nlm.nih.gov/projects/gap/cgi-bin/analysis.cgi?id=pha001677</a> |
| BloodPressure | ExerciseTest        | ETT2HRREC3MV        | Exercise recovery 3-min heart rate, exam 2, multivariable-adjusted         | <a href="http://www.ncbi.nlm.nih.gov/projects/gap/cgi-bin/analysis.cgi?id=pha001679">http://www.ncbi.nlm.nih.gov/projects/gap/cgi-bin/analysis.cgi?id=pha001679</a> |
| BloodPressure | ExerciseTest        | ETT2HRSTG2AS        | Exercise Stage 2 heart rate, exam 2, age-sex-adjusted                      | <a href="http://www.ncbi.nlm.nih.gov/projects/gap/cgi-bin/analysis.cgi?id=pha001681">http://www.ncbi.nlm.nih.gov/projects/gap/cgi-bin/analysis.cgi?id=pha001681</a> |
| BloodPressure | ExerciseTest        | ETT2HRSTG2MV        | Exercise Stage 2 heart rate, exam 2, multivariable-adjusted                | <a href="http://www.ncbi.nlm.nih.gov/projects/gap/cgi-bin/analysis.cgi?id=pha001683">http://www.ncbi.nlm.nih.gov/projects/gap/cgi-bin/analysis.cgi?id=pha001683</a> |
| BloodPressure | ExerciseTest        | ETT2SBPREC3AS       | Exercise recovery 3-min systolic BP, exam 2, age-sex-adjusted              | <a href="http://www.ncbi.nlm.nih.gov/projects/gap/cgi-bin/analysis.cgi?id=pha001685">http://www.ncbi.nlm.nih.gov/projects/gap/cgi-bin/analysis.cgi?id=pha001685</a> |
| BloodPressure | ExerciseTest        | ETT2SBPREC3MV       | Exercise recovery 3-min systolic BP, exam 2, multivariable-adjusted        | <a href="http://www.ncbi.nlm.nih.gov/projects/gap/cgi-bin/analysis.cgi?id=pha001687">http://www.ncbi.nlm.nih.gov/projects/gap/cgi-bin/analysis.cgi?id=pha001687</a> |
| BloodPressure | ExerciseTest        | ETT2SBPSTG2AS       | Exercise Stage 2 systolic BP, exam 2, age-sex-adjusted                     | <a href="http://www.ncbi.nlm.nih.gov/projects/gap/cgi-bin/analysis.cgi?id=pha001689">http://www.ncbi.nlm.nih.gov/projects/gap/cgi-bin/analysis.cgi?id=pha001689</a> |
| BloodPressure | ExerciseTest        | ETT2SBPSTG2MV       | Exercise Stage 2 systolic BP, exam 2, multivariable-adjusted               | <a href="http://www.ncbi.nlm.nih.gov/projects/gap/cgi-bin/analysis.cgi?id=pha001691">http://www.ncbi.nlm.nih.gov/projects/gap/cgi-bin/analysis.cgi?id=pha001691</a> |
| BloodPressure | tonometry           | A17AS               | augmentation index, exam 7, age-sex-adjusted                               | <a href="http://www.ncbi.nlm.nih.gov/projects/gap/cgi-bin/analysis.cgi?id=pha001693">http://www.ncbi.nlm.nih.gov/projects/gap/cgi-bin/analysis.cgi?id=pha001693</a> |
| BloodPressure | tonometry           | A17MV               | augmentation index, exam 7, multivariable-adjusted                         | <a href="http://www.ncbi.nlm.nih.gov/projects/gap/cgi-bin/analysis.cgi?id=pha001695">http://www.ncbi.nlm.nih.gov/projects/gap/cgi-bin/analysis.cgi?id=pha001695</a> |
| BloodPressure | tonometry           | CBPWV7AS            | carotid-brachial pulse wave velocity, exam 7, age-sex-adjusted             | <a href="http://www.ncbi.nlm.nih.gov/projects/gap/cgi-bin/analysis.cgi?id=pha001697">http://www.ncbi.nlm.nih.gov/projects/gap/cgi-bin/analysis.cgi?id=pha001697</a> |
| BloodPressure | tonometry           | CBPWV7MV            | carotid-brachial pulse wave velocity, exam 7, multivariable-adjusted       | <a href="http://www.ncbi.nlm.nih.gov/projects/gap/cgi-bin/analysis.cgi?id=pha001699">http://www.ncbi.nlm.nih.gov/projects/gap/cgi-bin/analysis.cgi?id=pha001699</a> |
| BloodPressure | tonometry           | CFPWV7AS            | carotid-femoral pulse wave velocity, exam 7, age-sex-adjusted              | <a href="http://www.ncbi.nlm.nih.gov/projects/gap/cgi-bin/analysis.cgi?id=pha001701">http://www.ncbi.nlm.nih.gov/projects/gap/cgi-bin/analysis.cgi?id=pha001701</a> |
| BloodPressure | tonometry           | CFPWV7MV            | carotid-femoral pulse wave velocity, exam 7, multivariable-adjusted        | <a href="http://www.ncbi.nlm.nih.gov/projects/gap/cgi-bin/analysis.cgi?id=pha001703">http://www.ncbi.nlm.nih.gov/projects/gap/cgi-bin/analysis.cgi?id=pha001703</a> |
| BloodPressure | tonometry           | CPP7AS              | central pulse pressure, exam 7, age-sex-adjusted                           | <a href="http://www.ncbi.nlm.nih.gov/projects/gap/cgi-bin/analysis.cgi?id=pha001705">http://www.ncbi.nlm.nih.gov/projects/gap/cgi-bin/analysis.cgi?id=pha001705</a> |
| BloodPressure | tonometry           | CPP7MV              | central pulse pressure, exam 7, multivariable-adjusted                     | <a href="http://www.ncbi.nlm.nih.gov/projects/gap/cgi-bin/analysis.cgi?id=pha001707">http://www.ncbi.nlm.nih.gov/projects/gap/cgi-bin/analysis.cgi?id=pha001707</a> |
| BloodPressure | tonometry           | CRPW7AS             | carotid-radial pulse wave velocity, exam 7, age-sex-adjusted               | <a href="http://www.ncbi.nlm.nih.gov/projects/gap/cgi-bin/analysis.cgi?id=pha001709">http://www.ncbi.nlm.nih.gov/projects/gap/cgi-bin/analysis.cgi?id=pha001709</a> |
| BloodPressure | tonometry           | CRPWV7MV            | carotid-radial pulse wave velocity, exam 7, multivariable-adjusted         | <a href="http://www.ncbi.nlm.nih.gov/projects/gap/cgi-bin/analysis.cgi?id=pha001711">http://www.ncbi.nlm.nih.gov/projects/gap/cgi-bin/analysis.cgi?id=pha001711</a> |
| BloodPressure | tonometry           | DBP7BRAOSCAS        | Diastolic BP Brachial oscillometric, exam 7, age-sex-adjusted              | <a href="http://www.ncbi.nlm.nih.gov/projects/gap/cgi-bin/analysis.cgi?id=pha001713">http://www.ncbi.nlm.nih.gov/projects/gap/cgi-bin/analysis.cgi?id=pha001713</a> |
| BloodPressure | tonometry           | DBP7BRAOSCMV        | Diastolic BP Brachial oscillometric, exam 7, multivariable-adjusted        | <a href="http://www.ncbi.nlm.nih.gov/projects/gap/cgi-bin/analysis.cgi?id=pha001715">http://www.ncbi.nlm.nih.gov/projects/gap/cgi-bin/analysis.cgi?id=pha001715</a> |
| BloodPressure | tonometry           | FWDWAVE7AS          | forward wave amplitude, exam 7, age-sex-adjusted                           | <a href="http://www.ncbi.nlm.nih.gov/projects/gap/cgi-bin/analysis.cgi?id=pha001717">http://www.ncbi.nlm.nih.gov/projects/gap/cgi-bin/analysis.cgi?id=pha001717</a> |
| BloodPressure | tonometry           | FWDWAVE7MV          | forward wave amplitude, exam 7, multivariable-adjusted                     | <a href="http://www.ncbi.nlm.nih.gov/projects/gap/cgi-bin/analysis.cgi?id=pha001719">http://www.ncbi.nlm.nih.gov/projects/gap/cgi-bin/analysis.cgi?id=pha001719</a> |
| BloodPressure | tonometry           | INVCFPWV7AS         | LV ejection time, exam 7, age-sex-adjusted                                 | <a href="http://www.ncbi.nlm.nih.gov/projects/gap/cgi-bin/analysis.cgi?id=pha001721">http://www.ncbi.nlm.nih.gov/projects/gap/cgi-bin/analysis.cgi?id=pha001721</a> |
| BloodPressure | tonometry           | INVCFPWV7MV         | LV ejection time, exam 7, multivariable-adjusted                           | <a href="http://www.ncbi.nlm.nih.gov/projects/gap/cgi-bin/analysis.cgi?id=pha001723">http://www.ncbi.nlm.nih.gov/projects/gap/cgi-bin/analysis.cgi?id=pha001723</a> |
| BloodPressure | tonometry           | MAP7AS              | mean arterial pressure, exam 7, age-sex-adjusted                           | <a href="http://www.ncbi.nlm.nih.gov/projects/gap/cgi-bin/analysis.cgi?id=pha001725">http://www.ncbi.nlm.nih.gov/projects/gap/cgi-bin/analysis.cgi?id=pha001725</a> |
| BloodPressure | tonometry           | MAP7MV              | mean arterial pressure, exam 7, multivariable-adjusted                     | <a href="http://www.ncbi.nlm.nih.gov/projects/gap/cgi-bin/analysis.cgi?id=pha001727">http://www.ncbi.nlm.nih.gov/projects/gap/cgi-bin/analysis.cgi?id=pha001727</a> |
| BloodPressure | tonometry           | PERAMPAP7AS         | Peripheral amplification apparent, exam 7, age-sex-adjusted                | <a href="http://www.ncbi.nlm.nih.gov/projects/gap/cgi-bin/analysis.cgi?id=pha001729">http://www.ncbi.nlm.nih.gov/projects/gap/cgi-bin/analysis.cgi?id=pha001729</a> |
| BloodPressure | tonometry           | PERAMPAP7MV         | Peripheral amplification apparent, exam 7, multivariable-adjusted          | <a href="http://www.ncbi.nlm.nih.gov/projects/gap/cgi-bin/analysis.cgi?id=pha001731">http://www.ncbi.nlm.nih.gov/projects/gap/cgi-bin/analysis.cgi?id=pha001731</a> |
| BloodPressure | tonometry           | PERAMPTRU7AS        | Peripheral amplification true, exam 7, age-sex-adjusted                    | <a href="http://www.ncbi.nlm.nih.gov/projects/gap/cgi-bin/analysis.cgi?id=pha001733">http://www.ncbi.nlm.nih.gov/projects/gap/cgi-bin/analysis.cgi?id=pha001733</a> |
| BloodPressure | tonometry           | PERAMPTRU7MV        | Peripheral amplification true, exam 7, multivariable-adjusted              | <a href="http://www.ncbi.nlm.nih.gov/projects/gap/cgi-bin/analysis.cgi?id=pha001735">http://www.ncbi.nlm.nih.gov/projects/gap/cgi-bin/analysis.cgi?id=pha001735</a> |
| BloodPressure | tonometry           | PP7BRAOSCAS         | Pulse pressure Brachial oscillometric, exam 7, age-sex-adjusted            | <a href="http://www.ncbi.nlm.nih.gov/projects/gap/cgi-bin/analysis.cgi?id=pha001737">http://www.ncbi.nlm.nih.gov/projects/gap/cgi-bin/analysis.cgi?id=pha001737</a> |
| BloodPressure | tonometry           | PP7BRAOSCMV         | Pulse pressure Brachial oscillometric, exam 7, multivariable-adjusted      | <a href="http://www.ncbi.nlm.nih.gov/projects/gap/cgi-bin/analysis.cgi?id=pha001739">http://www.ncbi.nlm.nih.gov/projects/gap/cgi-bin/analysis.cgi?id=pha001739</a> |
| BloodPressure | tonometry           | REFWAVE7AS          | reflected wave amplitude, exam 7, age-sex-adjusted                         | <a href="http://www.ncbi.nlm.nih.gov/projects/gap/cgi-bin/analysis.cgi?id=pha001741">http://www.ncbi.nlm.nih.gov/projects/gap/cgi-bin/analysis.cgi?id=pha001741</a> |
| BloodPressure | tonometry           | REFWAVE7MV          | reflected wave amplitude, exam 7, multivariable-adjusted                   | <a href="http://www.ncbi.nlm.nih.gov/projects/gap/cgi-bin/analysis.cgi?id=pha001743">http://www.ncbi.nlm.nih.gov/projects/gap/cgi-bin/analysis.cgi?id=pha001743</a> |
| BloodPressure | tonometry           | RWTT7AS             | reflected wave transit time, exam 7, age-sex-adjusted                      | <a href="http://www.ncbi.nlm.nih.gov/projects/gap/cgi-bin/analysis.cgi?id=pha001745">http://www.ncbi.nlm.nih.gov/projects/gap/cgi-bin/analysis.cgi?id=pha001745</a> |

Online Table 2: Phenotypes Evaluated for Association using Family-based Analysis (FBAT)

| Group         | Category            | Trait Label     | Name                                                                       | FBAT Link                                                                                                                                                           |
|---------------|---------------------|-----------------|----------------------------------------------------------------------------|---------------------------------------------------------------------------------------------------------------------------------------------------------------------|
| BloodPressure | tonometry           | RWTT7MV         | reflected wave transit time, exam 7, multivariable-adjusted                | <a href="http://www.ncbi.nlm.nih.gov/projects/gap/cgi-bin/analysis.cgi?id=pha001747">http://www.ncbi.nlm.nih.gov/projects/gap/cgi-bin/analysis.cgi?id=pha001747</a> |
| BloodPressure | tonometry           | SBP7BRAOSCAS    | Systolic BP Brachial oscillometric, exam 7, age-sex-adjusted               | <a href="http://www.ncbi.nlm.nih.gov/projects/gap/cgi-bin/analysis.cgi?id=pha001749">http://www.ncbi.nlm.nih.gov/projects/gap/cgi-bin/analysis.cgi?id=pha001749</a> |
| BloodPressure | tonometry           | SBP7BRAOSCMV    | Systolic BP Brachial oscillometric, exam 7, multivariable-adjusted         | <a href="http://www.ncbi.nlm.nih.gov/projects/gap/cgi-bin/analysis.cgi?id=pha001751">http://www.ncbi.nlm.nih.gov/projects/gap/cgi-bin/analysis.cgi?id=pha001751</a> |
| CVDMiscTraits | Cancer              | ALLCANCER1      | all cancer, adjusted for age & sex                                         | <a href="http://www.ncbi.nlm.nih.gov/projects/gap/cgi-bin/analysis.cgi?id=pha001331">http://www.ncbi.nlm.nih.gov/projects/gap/cgi-bin/analysis.cgi?id=pha001331</a> |
| CVDMiscTraits | Cancer              | ALLCANCER2      | all cancer, fully adjusted                                                 | <a href="http://www.ncbi.nlm.nih.gov/projects/gap/cgi-bin/analysis.cgi?id=pha001333">http://www.ncbi.nlm.nih.gov/projects/gap/cgi-bin/analysis.cgi?id=pha001333</a> |
| CVDMiscTraits | Cancer              | BREASTCANCER1   | breast cancer (women only), age-adjusted                                   | <a href="http://www.ncbi.nlm.nih.gov/projects/gap/cgi-bin/analysis.cgi?id=pha001335">http://www.ncbi.nlm.nih.gov/projects/gap/cgi-bin/analysis.cgi?id=pha001335</a> |
| CVDMiscTraits | Cancer              | BREASTCANCER2   | breast cancer (women only), adjusted for age, parity, BMI at entry         | <a href="http://www.ncbi.nlm.nih.gov/projects/gap/cgi-bin/analysis.cgi?id=pha001337">http://www.ncbi.nlm.nih.gov/projects/gap/cgi-bin/analysis.cgi?id=pha001337</a> |
| CVDMiscTraits | Cancer              | PROSTATECANCER1 | prostate cancer, adjusted for age at entry                                 | <a href="http://www.ncbi.nlm.nih.gov/projects/gap/cgi-bin/analysis.cgi?id=pha001339">http://www.ncbi.nlm.nih.gov/projects/gap/cgi-bin/analysis.cgi?id=pha001339</a> |
| CVDMiscTraits | CVDbySOE            | AllatheroCVD1D  | Age- & sex- adjusted incident CHD, ABI, TIA, or IC                         | <a href="http://www.ncbi.nlm.nih.gov/projects/gap/cgi-bin/analysis.cgi?id=pha001341">http://www.ncbi.nlm.nih.gov/projects/gap/cgi-bin/analysis.cgi?id=pha001341</a> |
| CVDMiscTraits | CVDbySOE            | AllatheroCVD2D  | multivariable-adjusted incident CHD, ABI, TIA, or IC                       | <a href="http://www.ncbi.nlm.nih.gov/projects/gap/cgi-bin/analysis.cgi?id=pha001343">http://www.ncbi.nlm.nih.gov/projects/gap/cgi-bin/analysis.cgi?id=pha001343</a> |
| CVDMiscTraits | CVDbySOE            | AllCHD1D        | Age- & sex-adjusted incident MI, AP, CI, or CHD death                      | <a href="http://www.ncbi.nlm.nih.gov/projects/gap/cgi-bin/analysis.cgi?id=pha001345">http://www.ncbi.nlm.nih.gov/projects/gap/cgi-bin/analysis.cgi?id=pha001345</a> |
| CVDMiscTraits | CVDbySOE            | AllCHD2D        | multivariable-adjusted incident MI, AP, CI, or CHD death                   | <a href="http://www.ncbi.nlm.nih.gov/projects/gap/cgi-bin/analysis.cgi?id=pha001347">http://www.ncbi.nlm.nih.gov/projects/gap/cgi-bin/analysis.cgi?id=pha001347</a> |
| CVDMiscTraits | CVDbySOE            | ALLCHF1D        | Age- & sex-adjusted incident heart failure (free of MI)                    | <a href="http://www.ncbi.nlm.nih.gov/projects/gap/cgi-bin/analysis.cgi?id=pha001349">http://www.ncbi.nlm.nih.gov/projects/gap/cgi-bin/analysis.cgi?id=pha001349</a> |
| CVDMiscTraits | CVDbySOE            | ALLCHF2D        | multivariable-adjusted incident heart failure (free of MI)                 | <a href="http://www.ncbi.nlm.nih.gov/projects/gap/cgi-bin/analysis.cgi?id=pha001351">http://www.ncbi.nlm.nih.gov/projects/gap/cgi-bin/analysis.cgi?id=pha001351</a> |
| CVDMiscTraits | CVDbySOE            | HardatheroCVD1D | Age- & sex-adjusted incident MI, CI, CHD death, or ABI                     | <a href="http://www.ncbi.nlm.nih.gov/projects/gap/cgi-bin/analysis.cgi?id=pha001357">http://www.ncbi.nlm.nih.gov/projects/gap/cgi-bin/analysis.cgi?id=pha001357</a> |
| CVDMiscTraits | CVDbySOE            | HardatheroCVD2D | multivariable-adjusted incident MI, CI, CHD death, or ABI                  | <a href="http://www.ncbi.nlm.nih.gov/projects/gap/cgi-bin/analysis.cgi?id=pha001359">http://www.ncbi.nlm.nih.gov/projects/gap/cgi-bin/analysis.cgi?id=pha001359</a> |
| CVDMiscTraits | CVDbySOE            | HardCHD1D       | Age- & sex-adjusted incident MI, CI, or CHD death                          | <a href="http://www.ncbi.nlm.nih.gov/projects/gap/cgi-bin/analysis.cgi?id=pha001361">http://www.ncbi.nlm.nih.gov/projects/gap/cgi-bin/analysis.cgi?id=pha001361</a> |
| CVDMiscTraits | CVDbySOE            | HardCHD2D       | multivariable-adjusted incident MI, CI, or CHD death                       | <a href="http://www.ncbi.nlm.nih.gov/projects/gap/cgi-bin/analysis.cgi?id=pha001363">http://www.ncbi.nlm.nih.gov/projects/gap/cgi-bin/analysis.cgi?id=pha001363</a> |
| CVDMiscTraits | CVDbySOE            | NoMICHF1D       | Age- & sex-adjusted incident heart failure, censored at interval MI        | <a href="http://www.ncbi.nlm.nih.gov/projects/gap/cgi-bin/analysis.cgi?id=pha001365">http://www.ncbi.nlm.nih.gov/projects/gap/cgi-bin/analysis.cgi?id=pha001365</a> |
| CVDMiscTraits | CVDbySOE            | NoMICHF2D       | multivariable-adjusted incident heart failure, censored at interval MI     | <a href="http://www.ncbi.nlm.nih.gov/projects/gap/cgi-bin/analysis.cgi?id=pha001367">http://www.ncbi.nlm.nih.gov/projects/gap/cgi-bin/analysis.cgi?id=pha001367</a> |
| CVDMiscTraits | ECGtraits           | PRAdjRRPOOL     | Age & RR adjusted PR interval cohort ex 11 offspring ex 1                  | <a href="http://www.ncbi.nlm.nih.gov/projects/gap/cgi-bin/analysis.cgi?id=pha001369">http://www.ncbi.nlm.nih.gov/projects/gap/cgi-bin/analysis.cgi?id=pha001369</a> |
| CVDMiscTraits | ECGtraits           | QTMEN           | Age & RR adjusted QT interval men cohort ex 11 offspring ex 1              | <a href="http://www.ncbi.nlm.nih.gov/projects/gap/cgi-bin/analysis.cgi?id=pha001371">http://www.ncbi.nlm.nih.gov/projects/gap/cgi-bin/analysis.cgi?id=pha001371</a> |
| CVDMiscTraits | ECGtraits           | QTPOOL          | Age & RR adjusted QT interval men & women cohort ex 11 offspring ex 1      | <a href="http://www.ncbi.nlm.nih.gov/projects/gap/cgi-bin/analysis.cgi?id=pha001373">http://www.ncbi.nlm.nih.gov/projects/gap/cgi-bin/analysis.cgi?id=pha001373</a> |
| CVDMiscTraits | ECGtraits           | QTWOMEN         | Age & RR adjusted QT interval women cohort ex 11 offspring ex 1            | <a href="http://www.ncbi.nlm.nih.gov/projects/gap/cgi-bin/analysis.cgi?id=pha001375">http://www.ncbi.nlm.nih.gov/projects/gap/cgi-bin/analysis.cgi?id=pha001375</a> |
| CVDMiscTraits | ECGtraits           | RRMEN           | Age adjusted RR interval men cohort ex 11 offspring ex 1                   | <a href="http://www.ncbi.nlm.nih.gov/projects/gap/cgi-bin/analysis.cgi?id=pha001377">http://www.ncbi.nlm.nih.gov/projects/gap/cgi-bin/analysis.cgi?id=pha001377</a> |
| CVDMiscTraits | ECGtraits           | RRPOOL          | Age adjusted RR interval men & women cohort ex 11 offspring ex 1           | <a href="http://www.ncbi.nlm.nih.gov/projects/gap/cgi-bin/analysis.cgi?id=pha001379">http://www.ncbi.nlm.nih.gov/projects/gap/cgi-bin/analysis.cgi?id=pha001379</a> |
| CVDMiscTraits | ECGtraits           | RRWOMEN         | Age adjusted RR interval women cohort ex 11 offspring ex 1                 | <a href="http://www.ncbi.nlm.nih.gov/projects/gap/cgi-bin/analysis.cgi?id=pha001381">http://www.ncbi.nlm.nih.gov/projects/gap/cgi-bin/analysis.cgi?id=pha001381</a> |
| CVDMiscTraits | HRVtraits           | HFHRV           | Age & HR adjusted high freq power HRV exams 18 (cohort), 3 (offspring)     | <a href="http://www.ncbi.nlm.nih.gov/projects/gap/cgi-bin/analysis.cgi?id=pha001383">http://www.ncbi.nlm.nih.gov/projects/gap/cgi-bin/analysis.cgi?id=pha001383</a> |
| CVDMiscTraits | HRVtraits           | LFHFHRV         | Age & HR adjusted low:high freq power HRV exams 18 (cohort), 3 (offspring) | <a href="http://www.ncbi.nlm.nih.gov/projects/gap/cgi-bin/analysis.cgi?id=pha001385">http://www.ncbi.nlm.nih.gov/projects/gap/cgi-bin/analysis.cgi?id=pha001385</a> |
| CVDMiscTraits | HRVtraits           | LFHRV           | Age & HR adjusted low frequency power HRV exams 18 (cohort), 3 (offspring) | <a href="http://www.ncbi.nlm.nih.gov/projects/gap/cgi-bin/analysis.cgi?id=pha001387">http://www.ncbi.nlm.nih.gov/projects/gap/cgi-bin/analysis.cgi?id=pha001387</a> |
| CVDMiscTraits | HRVtraits           | PNN50HRV        | Age & HR adjusted PNN50 HRV exams 18 (cohort), 3 (offspring)               | <a href="http://www.ncbi.nlm.nih.gov/projects/gap/cgi-bin/analysis.cgi?id=pha001389">http://www.ncbi.nlm.nih.gov/projects/gap/cgi-bin/analysis.cgi?id=pha001389</a> |
| CVDMiscTraits | HRVtraits           | SDNNHRV         | Age & HR adjusted SDNN HRV exams 18 (cohort), 3 (offspring)                | <a href="http://www.ncbi.nlm.nih.gov/projects/gap/cgi-bin/analysis.cgi?id=pha001391">http://www.ncbi.nlm.nih.gov/projects/gap/cgi-bin/analysis.cgi?id=pha001391</a> |
| CVDMiscTraits | HRVtraits           | TOTPWRHRV       | Age & HR adjusted total power HRV exams 18 (cohort), 3 (offspring)         | <a href="http://www.ncbi.nlm.nih.gov/projects/gap/cgi-bin/analysis.cgi?id=pha001393">http://www.ncbi.nlm.nih.gov/projects/gap/cgi-bin/analysis.cgi?id=pha001393</a> |
| CVDMiscTraits | HRVtraits           | VLFRV           | Age & HR adjusted very low freq power HRV exams 18 (cohort), 3 (offspring) | <a href="http://www.ncbi.nlm.nih.gov/projects/gap/cgi-bin/analysis.cgi?id=pha001395">http://www.ncbi.nlm.nih.gov/projects/gap/cgi-bin/analysis.cgi?id=pha001395</a> |
| CVDMiscTraits | Otherclinicaltraits | ALCOHOL1        | Age- & sex-adjusted drinks/day ex 1                                        | <a href="http://www.ncbi.nlm.nih.gov/projects/gap/cgi-bin/analysis.cgi?id=pha001397">http://www.ncbi.nlm.nih.gov/projects/gap/cgi-bin/analysis.cgi?id=pha001397</a> |
| CVDMiscTraits | Otherclinicaltraits | ALCOHOL2        | Age- & sex-adjusted drinks/day across all exams                            | <a href="http://www.ncbi.nlm.nih.gov/projects/gap/cgi-bin/analysis.cgi?id=pha001399">http://www.ncbi.nlm.nih.gov/projects/gap/cgi-bin/analysis.cgi?id=pha001399</a> |
| CVDMiscTraits | Otherclinicaltraits | ALCOHOL3        | Age- & sex-adjusted max drinks/day at any exam                             | <a href="http://www.ncbi.nlm.nih.gov/projects/gap/cgi-bin/analysis.cgi?id=pha001401">http://www.ncbi.nlm.nih.gov/projects/gap/cgi-bin/analysis.cgi?id=pha001401</a> |
| CVDMiscTraits | Otherclinicaltraits | GALLBLADDER     | Age- & sex-adjusted gallbladder disease                                    | <a href="http://www.ncbi.nlm.nih.gov/projects/gap/cgi-bin/analysis.cgi?id=pha001403">http://www.ncbi.nlm.nih.gov/projects/gap/cgi-bin/analysis.cgi?id=pha001403</a> |
| CVDMiscTraits | Otherclinicaltraits | GOUT            | Age-, sex- & BMI-adjusted gout                                             | <a href="http://www.ncbi.nlm.nih.gov/projects/gap/cgi-bin/analysis.cgi?id=pha001405">http://www.ncbi.nlm.nih.gov/projects/gap/cgi-bin/analysis.cgi?id=pha001405</a> |
| CVDMiscTraits | Othervasctraits     | ALLAF1          | Age- & sex-adjusted incident atrial fibrillation                           | <a href="http://www.ncbi.nlm.nih.gov/projects/gap/cgi-bin/analysis.cgi?id=pha001407">http://www.ncbi.nlm.nih.gov/projects/gap/cgi-bin/analysis.cgi?id=pha001407</a> |
| CVDMiscTraits | Othervasctraits     | ALLAF2          | multivariable-adjusted incident atrial fibrillation                        | <a href="http://www.ncbi.nlm.nih.gov/projects/gap/cgi-bin/analysis.cgi?id=pha001409">http://www.ncbi.nlm.nih.gov/projects/gap/cgi-bin/analysis.cgi?id=pha001409</a> |
| CVDMiscTraits | Othervasctraits     | VARICOSEVEINS   | age- & sex-adjusted varicose veins, men and women                          | <a href="http://www.ncbi.nlm.nih.gov/projects/gap/cgi-bin/analysis.cgi?id=pha001411">http://www.ncbi.nlm.nih.gov/projects/gap/cgi-bin/analysis.cgi?id=pha001411</a> |
| CVDMiscTraits | Othervasctraits     | VARICOSEVEINSF  | age- & #childbirths-adjusted varicose veins in women                       | <a href="http://www.ncbi.nlm.nih.gov/projects/gap/cgi-bin/analysis.cgi?id=pha001413">http://www.ncbi.nlm.nih.gov/projects/gap/cgi-bin/analysis.cgi?id=pha001413</a> |
| CVDMiscTraits | Othervasctraits     | VARICOSEVEINSM  | age-adjusted varicose veins in men                                         | <a href="http://www.ncbi.nlm.nih.gov/projects/gap/cgi-bin/analysis.cgi?id=pha001415">http://www.ncbi.nlm.nih.gov/projects/gap/cgi-bin/analysis.cgi?id=pha001415</a> |
| ITBiomarkers  | Hematological       | Hctavg12as      | Hematocrit, averaged residuals of exam 1 & 2, age & sex                    | <a href="http://www.ncbi.nlm.nih.gov/projects/gap/cgi-bin/analysis.cgi?id=pha000979">http://www.ncbi.nlm.nih.gov/projects/gap/cgi-bin/analysis.cgi?id=pha000979</a> |
| ITBiomarkers  | Hematological       | Hctavg12mv      | Hematocrit, averaged residuals of exam 1 & 2, multivariable                | <a href="http://www.ncbi.nlm.nih.gov/projects/gap/cgi-bin/analysis.cgi?id=pha000981">http://www.ncbi.nlm.nih.gov/projects/gap/cgi-bin/analysis.cgi?id=pha000981</a> |
| ITBiomarkers  | Hematological       | Hctex1as        | Hematocrit exam 1 age & sex                                                | <a href="http://www.ncbi.nlm.nih.gov/projects/gap/cgi-bin/analysis.cgi?id=pha000983">http://www.ncbi.nlm.nih.gov/projects/gap/cgi-bin/analysis.cgi?id=pha000983</a> |
| ITBiomarkers  | Hematological       | Hctex1mv        | Hematocrit exam 1 multivariable                                            | <a href="http://www.ncbi.nlm.nih.gov/projects/gap/cgi-bin/analysis.cgi?id=pha000985">http://www.ncbi.nlm.nih.gov/projects/gap/cgi-bin/analysis.cgi?id=pha000985</a> |
| ITBiomarkers  | Hematological       | Hctex2as        | Hematocrit exam 2 age & sex                                                | <a href="http://www.ncbi.nlm.nih.gov/projects/gap/cgi-bin/analysis.cgi?id=pha000987">http://www.ncbi.nlm.nih.gov/projects/gap/cgi-bin/analysis.cgi?id=pha000987</a> |
| ITBiomarkers  | Hematological       | Hctex2mv        | Hematocrit exam 2 multivariable                                            | <a href="http://www.ncbi.nlm.nih.gov/projects/gap/cgi-bin/analysis.cgi?id=pha000989">http://www.ncbi.nlm.nih.gov/projects/gap/cgi-bin/analysis.cgi?id=pha000989</a> |
| ITBiomarkers  | Hematological       | Hgbavg12as      | Hemoglobin, averaged residuals of exam 1 & 2, age & sex                    | <a href="http://www.ncbi.nlm.nih.gov/projects/gap/cgi-bin/analysis.cgi?id=pha000991">http://www.ncbi.nlm.nih.gov/projects/gap/cgi-bin/analysis.cgi?id=pha000991</a> |
| ITBiomarkers  | Hematological       | Hgbavg12mv      | Hemoglobin averaged residuals of exam 1 & 2, multivariable                 | <a href="http://www.ncbi.nlm.nih.gov/projects/gap/cgi-bin/analysis.cgi?id=pha000993">http://www.ncbi.nlm.nih.gov/projects/gap/cgi-bin/analysis.cgi?id=pha000993</a> |
| ITBiomarkers  | Hematological       | Hgbex1as        | Hemoglobin exam 1 age & sex                                                | <a href="http://www.ncbi.nlm.nih.gov/projects/gap/cgi-bin/analysis.cgi?id=pha000995">http://www.ncbi.nlm.nih.gov/projects/gap/cgi-bin/analysis.cgi?id=pha000995</a> |
| ITBiomarkers  | Hematological       | Hgbex1mv        | Hemoglobin exam 1 multivariable                                            | <a href="http://www.ncbi.nlm.nih.gov/projects/gap/cgi-bin/analysis.cgi?id=pha000997">http://www.ncbi.nlm.nih.gov/projects/gap/cgi-bin/analysis.cgi?id=pha000997</a> |
| ITBiomarkers  | Hematological       | Hgbex2as        | Hemoglobin exam 2 age & sex                                                | <a href="http://www.ncbi.nlm.nih.gov/projects/gap/cgi-bin/analysis.cgi?id=pha000999">http://www.ncbi.nlm.nih.gov/projects/gap/cgi-bin/analysis.cgi?id=pha000999</a> |
| ITBiomarkers  | Hematological       | Hgbex2mv        | Hemoglobin exam 2 multivariable                                            | <a href="http://www.ncbi.nlm.nih.gov/projects/gap/cgi-bin/analysis.cgi?id=pha001001">http://www.ncbi.nlm.nih.gov/projects/gap/cgi-bin/analysis.cgi?id=pha001001</a> |

Online Table 2: Phenotypes Evaluated for Association using Family-based Analysis (FBAT)

| Group        | Category      | Trait Label        | Name                                                                        | FBAT Link                                                                                                                                                           |
|--------------|---------------|--------------------|-----------------------------------------------------------------------------|---------------------------------------------------------------------------------------------------------------------------------------------------------------------|
| ITBiomarkers | Hematological | MCHCavg12as        | Mean corpuscular hemoglobin concentration avg. residuals exam 1&2 age & sex | <a href="http://www.ncbi.nlm.nih.gov/projects/gap/cgi-bin/analysis.cgi?id=pha001003">http://www.ncbi.nlm.nih.gov/projects/gap/cgi-bin/analysis.cgi?id=pha001003</a> |
| ITBiomarkers | Hematological | MCHCavg12mv        | Mean corpuscular hemoglobin concentration avg. residuals of exam 1&2 MV     | <a href="http://www.ncbi.nlm.nih.gov/projects/gap/cgi-bin/analysis.cgi?id=pha001005">http://www.ncbi.nlm.nih.gov/projects/gap/cgi-bin/analysis.cgi?id=pha001005</a> |
| ITBiomarkers | Hematological | MCHCex1as          | Mean corpuscular hemoglobin concentration exam 1 age & sex                  | <a href="http://www.ncbi.nlm.nih.gov/projects/gap/cgi-bin/analysis.cgi?id=pha001007">http://www.ncbi.nlm.nih.gov/projects/gap/cgi-bin/analysis.cgi?id=pha001007</a> |
| ITBiomarkers | Hematological | MCHCex1mv          | Mean corpuscular hemoglobin concentration exam 1 multivariable              | <a href="http://www.ncbi.nlm.nih.gov/projects/gap/cgi-bin/analysis.cgi?id=pha001009">http://www.ncbi.nlm.nih.gov/projects/gap/cgi-bin/analysis.cgi?id=pha001009</a> |
| ITBiomarkers | Hematological | MCHCex2as          | Mean corpuscular hemoglobin concentration exam 2 age & sex                  | <a href="http://www.ncbi.nlm.nih.gov/projects/gap/cgi-bin/analysis.cgi?id=pha001011">http://www.ncbi.nlm.nih.gov/projects/gap/cgi-bin/analysis.cgi?id=pha001011</a> |
| ITBiomarkers | Hematological | MCHCex2mv          | Mean corpuscular hemoglobin concentration exam 2 multivariable              | <a href="http://www.ncbi.nlm.nih.gov/projects/gap/cgi-bin/analysis.cgi?id=pha001013">http://www.ncbi.nlm.nih.gov/projects/gap/cgi-bin/analysis.cgi?id=pha001013</a> |
| ITBiomarkers | Hematological | MCVavg12as         | Mean corpuscular volume averaged residuals of exam 1 & 2, age & sex         | <a href="http://www.ncbi.nlm.nih.gov/projects/gap/cgi-bin/analysis.cgi?id=pha001015">http://www.ncbi.nlm.nih.gov/projects/gap/cgi-bin/analysis.cgi?id=pha001015</a> |
| ITBiomarkers | Hematological | MCVavg12mv         | Mean corpuscular volume averaged residuals of exam 1 and 2, multivariable   | <a href="http://www.ncbi.nlm.nih.gov/projects/gap/cgi-bin/analysis.cgi?id=pha001017">http://www.ncbi.nlm.nih.gov/projects/gap/cgi-bin/analysis.cgi?id=pha001017</a> |
| ITBiomarkers | Hematological | MCVex1as           | Mean corpuscular volume exam 1 age & sex                                    | <a href="http://www.ncbi.nlm.nih.gov/projects/gap/cgi-bin/analysis.cgi?id=pha001019">http://www.ncbi.nlm.nih.gov/projects/gap/cgi-bin/analysis.cgi?id=pha001019</a> |
| ITBiomarkers | Hematological | MCVex1mv           | Mean corpuscular volume multivariable                                       | <a href="http://www.ncbi.nlm.nih.gov/projects/gap/cgi-bin/analysis.cgi?id=pha001021">http://www.ncbi.nlm.nih.gov/projects/gap/cgi-bin/analysis.cgi?id=pha001021</a> |
| ITBiomarkers | Hematological | MCVex2as           | Mean corpuscular volume exam 2 age & sex                                    | <a href="http://www.ncbi.nlm.nih.gov/projects/gap/cgi-bin/analysis.cgi?id=pha001023">http://www.ncbi.nlm.nih.gov/projects/gap/cgi-bin/analysis.cgi?id=pha001023</a> |
| ITBiomarkers | Hematological | MCVex2mv           | Mean corpuscular volume multivariable exam 2                                | <a href="http://www.ncbi.nlm.nih.gov/projects/gap/cgi-bin/analysis.cgi?id=pha001025">http://www.ncbi.nlm.nih.gov/projects/gap/cgi-bin/analysis.cgi?id=pha001025</a> |
| ITBiomarkers | Hematological | RBCCavg12as        | Red blood cell count averaged residuals of exam 1 & 2, age & sex            | <a href="http://www.ncbi.nlm.nih.gov/projects/gap/cgi-bin/analysis.cgi?id=pha001027">http://www.ncbi.nlm.nih.gov/projects/gap/cgi-bin/analysis.cgi?id=pha001027</a> |
| ITBiomarkers | Hematological | RBCCavg12mv        | Red blood cell count averaged residuals exam 1 & 2, multivariable           | <a href="http://www.ncbi.nlm.nih.gov/projects/gap/cgi-bin/analysis.cgi?id=pha001029">http://www.ncbi.nlm.nih.gov/projects/gap/cgi-bin/analysis.cgi?id=pha001029</a> |
| ITBiomarkers | Hematological | RBCCex1as          | Red blood cell count exam 1 age & sex                                       | <a href="http://www.ncbi.nlm.nih.gov/projects/gap/cgi-bin/analysis.cgi?id=pha001031">http://www.ncbi.nlm.nih.gov/projects/gap/cgi-bin/analysis.cgi?id=pha001031</a> |
| ITBiomarkers | Hematological | RBCCex1mv          | Red blood cell count exam 1 multivariable                                   | <a href="http://www.ncbi.nlm.nih.gov/projects/gap/cgi-bin/analysis.cgi?id=pha001033">http://www.ncbi.nlm.nih.gov/projects/gap/cgi-bin/analysis.cgi?id=pha001033</a> |
| ITBiomarkers | Hematological | RBCCex2as          | Red blood cell count exam 2 age & sex                                       | <a href="http://www.ncbi.nlm.nih.gov/projects/gap/cgi-bin/analysis.cgi?id=pha001035">http://www.ncbi.nlm.nih.gov/projects/gap/cgi-bin/analysis.cgi?id=pha001035</a> |
| ITBiomarkers | Hematological | RBCCex2asWIN       | Red blood cell count exam 2 age & sex, Winsorized                           | <a href="http://www.ncbi.nlm.nih.gov/projects/gap/cgi-bin/analysis.cgi?id=pha001037">http://www.ncbi.nlm.nih.gov/projects/gap/cgi-bin/analysis.cgi?id=pha001037</a> |
| ITBiomarkers | Hematological | RBCCex2mv          | Red blood cell count exam 2 multivariable                                   | <a href="http://www.ncbi.nlm.nih.gov/projects/gap/cgi-bin/analysis.cgi?id=pha001039">http://www.ncbi.nlm.nih.gov/projects/gap/cgi-bin/analysis.cgi?id=pha001039</a> |
| ITBiomarkers | Hematological | RBCCex2mvWIN       | Red blood cell count exam 2 multivariable, Winsorized                       | <a href="http://www.ncbi.nlm.nih.gov/projects/gap/cgi-bin/analysis.cgi?id=pha001041">http://www.ncbi.nlm.nih.gov/projects/gap/cgi-bin/analysis.cgi?id=pha001041</a> |
| ITBiomarkers | Hematological | WBCavg12as         | White blood cell count averaged residuals of exam 1 & 2, age & sex          | <a href="http://www.ncbi.nlm.nih.gov/projects/gap/cgi-bin/analysis.cgi?id=pha001043">http://www.ncbi.nlm.nih.gov/projects/gap/cgi-bin/analysis.cgi?id=pha001043</a> |
| ITBiomarkers | Hematological | WBCavg12mv         | White blood cell count, averaged residuals of exam 1 & 2, multivariable     | <a href="http://www.ncbi.nlm.nih.gov/projects/gap/cgi-bin/analysis.cgi?id=pha001045">http://www.ncbi.nlm.nih.gov/projects/gap/cgi-bin/analysis.cgi?id=pha001045</a> |
| ITBiomarkers | Hematological | WBCex1as           | White blood cell count exam 1 age & sex, log transformed                    | <a href="http://www.ncbi.nlm.nih.gov/projects/gap/cgi-bin/analysis.cgi?id=pha001047">http://www.ncbi.nlm.nih.gov/projects/gap/cgi-bin/analysis.cgi?id=pha001047</a> |
| ITBiomarkers | Hematological | WBCex1mv           | White blood cell count exam 1 multivariable, log transformed                | <a href="http://www.ncbi.nlm.nih.gov/projects/gap/cgi-bin/analysis.cgi?id=pha001049">http://www.ncbi.nlm.nih.gov/projects/gap/cgi-bin/analysis.cgi?id=pha001049</a> |
| ITBiomarkers | Hematological | WBCex2as           | White blood cell count exam 2 age & sex                                     | <a href="http://www.ncbi.nlm.nih.gov/projects/gap/cgi-bin/analysis.cgi?id=pha001051">http://www.ncbi.nlm.nih.gov/projects/gap/cgi-bin/analysis.cgi?id=pha001051</a> |
| ITBiomarkers | Hematological | WBCex2mv           | White blood cell count exam 2 multivariable                                 | <a href="http://www.ncbi.nlm.nih.gov/projects/gap/cgi-bin/analysis.cgi?id=pha001053">http://www.ncbi.nlm.nih.gov/projects/gap/cgi-bin/analysis.cgi?id=pha001053</a> |
| ITBiomarkers | Hemostatic    | dDimerex5as        | D dimer at exam 6 age & sex, log transformed                                | <a href="http://www.ncbi.nlm.nih.gov/projects/gap/cgi-bin/analysis.cgi?id=pha001055">http://www.ncbi.nlm.nih.gov/projects/gap/cgi-bin/analysis.cgi?id=pha001055</a> |
| ITBiomarkers | Hemostatic    | dDimerex5mv        | D dimer at exam 6 multivariable, log transformed                            | <a href="http://www.ncbi.nlm.nih.gov/projects/gap/cgi-bin/analysis.cgi?id=pha001057">http://www.ncbi.nlm.nih.gov/projects/gap/cgi-bin/analysis.cgi?id=pha001057</a> |
| ITBiomarkers | Hemostatic    | FibrinogenAvg567as | Fibrinogen averaged residuals of exam 5, 6 & 7 age & sex, log transformed   | <a href="http://www.ncbi.nlm.nih.gov/projects/gap/cgi-bin/analysis.cgi?id=pha001059">http://www.ncbi.nlm.nih.gov/projects/gap/cgi-bin/analysis.cgi?id=pha001059</a> |
| ITBiomarkers | Hemostatic    | FibrinogenAvg567mv | Fibrinogen averaged residuals exam 5, 6 & 7 multivariable, log transformed  | <a href="http://www.ncbi.nlm.nih.gov/projects/gap/cgi-bin/analysis.cgi?id=pha001061">http://www.ncbi.nlm.nih.gov/projects/gap/cgi-bin/analysis.cgi?id=pha001061</a> |
| ITBiomarkers | Hemostatic    | Fibrinogenex5as    | Fibrinogen at exam 5 age & sex, log transformed                             | <a href="http://www.ncbi.nlm.nih.gov/projects/gap/cgi-bin/analysis.cgi?id=pha001063">http://www.ncbi.nlm.nih.gov/projects/gap/cgi-bin/analysis.cgi?id=pha001063</a> |
| ITBiomarkers | Hemostatic    | Fibrinogenex5mv    | Fibrinogen at exam 5 multivariable, log transformed                         | <a href="http://www.ncbi.nlm.nih.gov/projects/gap/cgi-bin/analysis.cgi?id=pha001065">http://www.ncbi.nlm.nih.gov/projects/gap/cgi-bin/analysis.cgi?id=pha001065</a> |
| ITBiomarkers | Hemostatic    | Fibrinogenex6as    | Fibrinogen at exam 6 age & sex, log transformed                             | <a href="http://www.ncbi.nlm.nih.gov/projects/gap/cgi-bin/analysis.cgi?id=pha001067">http://www.ncbi.nlm.nih.gov/projects/gap/cgi-bin/analysis.cgi?id=pha001067</a> |
| ITBiomarkers | Hemostatic    | Fibrinogenex6mv    | Fibrinogen at exam 6 multivariable, log transformed                         | <a href="http://www.ncbi.nlm.nih.gov/projects/gap/cgi-bin/analysis.cgi?id=pha001069">http://www.ncbi.nlm.nih.gov/projects/gap/cgi-bin/analysis.cgi?id=pha001069</a> |
| ITBiomarkers | Hemostatic    | Fibrinogenex7as    | Fibrinogen at exam 7 age & sex, log transformed                             | <a href="http://www.ncbi.nlm.nih.gov/projects/gap/cgi-bin/analysis.cgi?id=pha001071">http://www.ncbi.nlm.nih.gov/projects/gap/cgi-bin/analysis.cgi?id=pha001071</a> |
| ITBiomarkers | Hemostatic    | Fibrinogenex7mv    | Fibrinogen at exam 7 multivariable, log transformed                         | <a href="http://www.ncbi.nlm.nih.gov/projects/gap/cgi-bin/analysis.cgi?id=pha001073">http://www.ncbi.nlm.nih.gov/projects/gap/cgi-bin/analysis.cgi?id=pha001073</a> |
| ITBiomarkers | Hemostatic    | FVIIlex5as         | Factor VII at exam 5 age & sex                                              | <a href="http://www.ncbi.nlm.nih.gov/projects/gap/cgi-bin/analysis.cgi?id=pha001075">http://www.ncbi.nlm.nih.gov/projects/gap/cgi-bin/analysis.cgi?id=pha001075</a> |
| ITBiomarkers | Hemostatic    | FVIIlex5mv         | Factor VII at exam 5 multivariable                                          | <a href="http://www.ncbi.nlm.nih.gov/projects/gap/cgi-bin/analysis.cgi?id=pha001077">http://www.ncbi.nlm.nih.gov/projects/gap/cgi-bin/analysis.cgi?id=pha001077</a> |
| ITBiomarkers | Hemostatic    | PAI1ex56Avgas      | Log plasminogen Activator 1 avg. residuals exam 5& 6 age & sex              | <a href="http://www.ncbi.nlm.nih.gov/projects/gap/cgi-bin/analysis.cgi?id=pha001079">http://www.ncbi.nlm.nih.gov/projects/gap/cgi-bin/analysis.cgi?id=pha001079</a> |
| ITBiomarkers | Hemostatic    | PAI1ex56Avgmv      | Log plasminogen Activator 1 avg. residuals exam 5 & 6 multivariable         | <a href="http://www.ncbi.nlm.nih.gov/projects/gap/cgi-bin/analysis.cgi?id=pha001081">http://www.ncbi.nlm.nih.gov/projects/gap/cgi-bin/analysis.cgi?id=pha001081</a> |
| ITBiomarkers | Hemostatic    | PAI1ex5as          | Plasminogen Activator 1 at exam 5 age & sex, log transformed                | <a href="http://www.ncbi.nlm.nih.gov/projects/gap/cgi-bin/analysis.cgi?id=pha001083">http://www.ncbi.nlm.nih.gov/projects/gap/cgi-bin/analysis.cgi?id=pha001083</a> |
| ITBiomarkers | Hemostatic    | PAI1ex5mv          | Plasminogen Activator 1 at exam 5 multivariable, log transformed            | <a href="http://www.ncbi.nlm.nih.gov/projects/gap/cgi-bin/analysis.cgi?id=pha001085">http://www.ncbi.nlm.nih.gov/projects/gap/cgi-bin/analysis.cgi?id=pha001085</a> |
| ITBiomarkers | Hemostatic    | PAI1ex6as          | Plasminogen Activator 1 at exam 6 age & sex, log transformed                | <a href="http://www.ncbi.nlm.nih.gov/projects/gap/cgi-bin/analysis.cgi?id=pha001087">http://www.ncbi.nlm.nih.gov/projects/gap/cgi-bin/analysis.cgi?id=pha001087</a> |
| ITBiomarkers | Hemostatic    | PAI1ex6mv          | Plasminogen Activator 1 at exam 6 multivariable, log transformed            | <a href="http://www.ncbi.nlm.nih.gov/projects/gap/cgi-bin/analysis.cgi?id=pha001089">http://www.ncbi.nlm.nih.gov/projects/gap/cgi-bin/analysis.cgi?id=pha001089</a> |
| ITBiomarkers | Hemostatic    | PlateletAgADPex5as | Platelet Aggregation to ADP exam 5, age & sex, log transformed              | <a href="http://www.ncbi.nlm.nih.gov/projects/gap/cgi-bin/analysis.cgi?id=pha001091">http://www.ncbi.nlm.nih.gov/projects/gap/cgi-bin/analysis.cgi?id=pha001091</a> |
| ITBiomarkers | Hemostatic    | PlateletAgADPex5mv | Log ADP platelet aggregation, exam 5, multivariable                         | <a href="http://www.ncbi.nlm.nih.gov/projects/gap/cgi-bin/analysis.cgi?id=pha001093">http://www.ncbi.nlm.nih.gov/projects/gap/cgi-bin/analysis.cgi?id=pha001093</a> |
| ITBiomarkers | Hemostatic    | PlateletAgCollx5as | Platelet Aggregation to collagen, exam 5, age & sex, log transformed        | <a href="http://www.ncbi.nlm.nih.gov/projects/gap/cgi-bin/analysis.cgi?id=pha001095">http://www.ncbi.nlm.nih.gov/projects/gap/cgi-bin/analysis.cgi?id=pha001095</a> |
| ITBiomarkers | Hemostatic    | PlateletAgCollx5mv | Platelet Aggregation to collagen, exam 5, multivariable, log transformed    | <a href="http://www.ncbi.nlm.nih.gov/projects/gap/cgi-bin/analysis.cgi?id=pha001097">http://www.ncbi.nlm.nih.gov/projects/gap/cgi-bin/analysis.cgi?id=pha001097</a> |
| ITBiomarkers | Hemostatic    | PlateletAgEpiex5as | Platelet Aggregation to Epinephrine at exam 5 age & sex, log transformed    | <a href="http://www.ncbi.nlm.nih.gov/projects/gap/cgi-bin/analysis.cgi?id=pha001099">http://www.ncbi.nlm.nih.gov/projects/gap/cgi-bin/analysis.cgi?id=pha001099</a> |
| ITBiomarkers | Hemostatic    | PlateletAgEpiex5mv | Platelet Aggregation to Epinephrine exam 5 multivariable, log transformed   | <a href="http://www.ncbi.nlm.nih.gov/projects/gap/cgi-bin/analysis.cgi?id=pha001101">http://www.ncbi.nlm.nih.gov/projects/gap/cgi-bin/analysis.cgi?id=pha001101</a> |
| ITBiomarkers | Hemostatic    | tPAex5as           | tPA Antigen at exam 5 age & sex, log transformed                            | <a href="http://www.ncbi.nlm.nih.gov/projects/gap/cgi-bin/analysis.cgi?id=pha001103">http://www.ncbi.nlm.nih.gov/projects/gap/cgi-bin/analysis.cgi?id=pha001103</a> |
| ITBiomarkers | Hemostatic    | tPAex5mv           | tPA Antigen at exam 5 multivariable, log transformed                        | <a href="http://www.ncbi.nlm.nih.gov/projects/gap/cgi-bin/analysis.cgi?id=pha001105">http://www.ncbi.nlm.nih.gov/projects/gap/cgi-bin/analysis.cgi?id=pha001105</a> |
| ITBiomarkers | Hemostatic    | Viscosityex5as     | Viscosity I at exam 5 age & sex                                             | <a href="http://www.ncbi.nlm.nih.gov/projects/gap/cgi-bin/analysis.cgi?id=pha001107">http://www.ncbi.nlm.nih.gov/projects/gap/cgi-bin/analysis.cgi?id=pha001107</a> |
| ITBiomarkers | Hemostatic    | Viscosityex5mv     | Viscosity I at exam 5 multivariable                                         | <a href="http://www.ncbi.nlm.nih.gov/projects/gap/cgi-bin/analysis.cgi?id=pha001109">http://www.ncbi.nlm.nih.gov/projects/gap/cgi-bin/analysis.cgi?id=pha001109</a> |
| ITBiomarkers | Hemostatic    | wVWex5as           | von Willebrand Factor at exam 5 age & sex                                   | <a href="http://www.ncbi.nlm.nih.gov/projects/gap/cgi-bin/analysis.cgi?id=pha001111">http://www.ncbi.nlm.nih.gov/projects/gap/cgi-bin/analysis.cgi?id=pha001111</a> |
| ITBiomarkers | Hemostatic    | wVWex5mv           | von Willebrand Factor at exam 5 multivariable                               | <a href="http://www.ncbi.nlm.nih.gov/projects/gap/cgi-bin/analysis.cgi?id=pha001113">http://www.ncbi.nlm.nih.gov/projects/gap/cgi-bin/analysis.cgi?id=pha001113</a> |

Online Table 2: Phenotypes Evaluated for Association using Family-based Analysis (FBAT)

| Group        | Category     | Trait Label         | Name                                                                      | FBAT Link                                                                                                                                                           |
|--------------|--------------|---------------------|---------------------------------------------------------------------------|---------------------------------------------------------------------------------------------------------------------------------------------------------------------|
| ITBiomarkers | Inflammation | CD40Lplasmaex7as    | CD40Ligand plasma exam 7, age- & sex-adjusted, log transformed            | <a href="http://www.ncbi.nlm.nih.gov/projects/gap/cgi-bin/analysis.cgi?id=pha001115">http://www.ncbi.nlm.nih.gov/projects/gap/cgi-bin/analysis.cgi?id=pha001115</a> |
| ITBiomarkers | Inflammation | CD40Lplasmaex7mv    | CD40Ligand plasma exam 7 multivariable-adjusted, log transformed          | <a href="http://www.ncbi.nlm.nih.gov/projects/gap/cgi-bin/analysis.cgi?id=pha001117">http://www.ncbi.nlm.nih.gov/projects/gap/cgi-bin/analysis.cgi?id=pha001117</a> |
| ITBiomarkers | Inflammation | CD40Lserumex7as     | CD40Ligand serum exam 7, age- & sex-adjusted, log transformed             | <a href="http://www.ncbi.nlm.nih.gov/projects/gap/cgi-bin/analysis.cgi?id=pha001119">http://www.ncbi.nlm.nih.gov/projects/gap/cgi-bin/analysis.cgi?id=pha001119</a> |
| ITBiomarkers | Inflammation | CD40Lserumex7mv     | CD40Ligand serum, exam 7 multivariable-adjusted, log transformed          | <a href="http://www.ncbi.nlm.nih.gov/projects/gap/cgi-bin/analysis.cgi?id=pha001121">http://www.ncbi.nlm.nih.gov/projects/gap/cgi-bin/analysis.cgi?id=pha001121</a> |
| ITBiomarkers | Inflammation | CRPavg267asB        | Log C-reactive protein average exam 2, 6 & 7 age- & sex-adjusted          | <a href="http://www.ncbi.nlm.nih.gov/projects/gap/cgi-bin/analysis.cgi?id=pha001171">http://www.ncbi.nlm.nih.gov/projects/gap/cgi-bin/analysis.cgi?id=pha001171</a> |
| ITBiomarkers | Inflammation | CRPavg267mvB        | Log C-reactive protein average exam 2, 6 & 7, multivariable-adjusted      | <a href="http://www.ncbi.nlm.nih.gov/projects/gap/cgi-bin/analysis.cgi?id=pha001173">http://www.ncbi.nlm.nih.gov/projects/gap/cgi-bin/analysis.cgi?id=pha001173</a> |
| ITBiomarkers | Inflammation | CRPex2asB           | Log C-reactive protein exam 2, age- & sex-adjusted                        | <a href="http://www.ncbi.nlm.nih.gov/projects/gap/cgi-bin/analysis.cgi?id=pha001175">http://www.ncbi.nlm.nih.gov/projects/gap/cgi-bin/analysis.cgi?id=pha001175</a> |
| ITBiomarkers | Inflammation | CRPex2mvB           | Log C-reactive protein exam 2, multivariable-adjusted                     | <a href="http://www.ncbi.nlm.nih.gov/projects/gap/cgi-bin/analysis.cgi?id=pha001177">http://www.ncbi.nlm.nih.gov/projects/gap/cgi-bin/analysis.cgi?id=pha001177</a> |
| ITBiomarkers | Inflammation | CRPex5as            | Log C-reactive protein Hemagen Assay exam 5, age- & sex-adjusted          | <a href="http://www.ncbi.nlm.nih.gov/projects/gap/cgi-bin/analysis.cgi?id=pha001123">http://www.ncbi.nlm.nih.gov/projects/gap/cgi-bin/analysis.cgi?id=pha001123</a> |
| ITBiomarkers | Inflammation | CRPex5mv            | Log C-reactive protein Hemagen Assay exam 5, multivariable-adjusted       | <a href="http://www.ncbi.nlm.nih.gov/projects/gap/cgi-bin/analysis.cgi?id=pha001125">http://www.ncbi.nlm.nih.gov/projects/gap/cgi-bin/analysis.cgi?id=pha001125</a> |
| ITBiomarkers | Inflammation | CRPex6as            | Log C-reactive protein exam 6, age- & sex-adjusted                        | <a href="http://www.ncbi.nlm.nih.gov/projects/gap/cgi-bin/analysis.cgi?id=pha001127">http://www.ncbi.nlm.nih.gov/projects/gap/cgi-bin/analysis.cgi?id=pha001127</a> |
| ITBiomarkers | Inflammation | CRPex6mv            | Log C-reactive protein exam 6, multivariable-adjusted                     | <a href="http://www.ncbi.nlm.nih.gov/projects/gap/cgi-bin/analysis.cgi?id=pha001129">http://www.ncbi.nlm.nih.gov/projects/gap/cgi-bin/analysis.cgi?id=pha001129</a> |
| ITBiomarkers | Inflammation | CRPex7as            | Log C-reactive protein exam 7, age- & sex-adjusted                        | <a href="http://www.ncbi.nlm.nih.gov/projects/gap/cgi-bin/analysis.cgi?id=pha001131">http://www.ncbi.nlm.nih.gov/projects/gap/cgi-bin/analysis.cgi?id=pha001131</a> |
| ITBiomarkers | Inflammation | CRPex7mv            | Log C-reactive protein exam 7, multivariable-adjusted                     | <a href="http://www.ncbi.nlm.nih.gov/projects/gap/cgi-bin/analysis.cgi?id=pha001133">http://www.ncbi.nlm.nih.gov/projects/gap/cgi-bin/analysis.cgi?id=pha001133</a> |
| ITBiomarkers | Inflammation | ICAM1ex7as          | Log intercellular adhesion molecule-1 exam 7, age- & sex-adjusted         | <a href="http://www.ncbi.nlm.nih.gov/projects/gap/cgi-bin/analysis.cgi?id=pha001135">http://www.ncbi.nlm.nih.gov/projects/gap/cgi-bin/analysis.cgi?id=pha001135</a> |
| ITBiomarkers | Inflammation | ICAM1ex7mv          | Log intercellular adhesion molecule-1 exam 7, multivariable-adjusted      | <a href="http://www.ncbi.nlm.nih.gov/projects/gap/cgi-bin/analysis.cgi?id=pha001137">http://www.ncbi.nlm.nih.gov/projects/gap/cgi-bin/analysis.cgi?id=pha001137</a> |
| ITBiomarkers | Inflammation | IL6ex7as            | Log interleukin 6 Exam 7, age- & sex-adjusted                             | <a href="http://www.ncbi.nlm.nih.gov/projects/gap/cgi-bin/analysis.cgi?id=pha001139">http://www.ncbi.nlm.nih.gov/projects/gap/cgi-bin/analysis.cgi?id=pha001139</a> |
| ITBiomarkers | Inflammation | IL6ex7mv            | Log interleukin 6 Exam 7, multivariable-adjusted                          | <a href="http://www.ncbi.nlm.nih.gov/projects/gap/cgi-bin/analysis.cgi?id=pha001141">http://www.ncbi.nlm.nih.gov/projects/gap/cgi-bin/analysis.cgi?id=pha001141</a> |
| ITBiomarkers | Inflammation | IsoCrUrinePex7as    | Log urinary isoprostanes/creatinine exam 7, age- & sex-adjusted           | <a href="http://www.ncbi.nlm.nih.gov/projects/gap/cgi-bin/analysis.cgi?id=pha001143">http://www.ncbi.nlm.nih.gov/projects/gap/cgi-bin/analysis.cgi?id=pha001143</a> |
| ITBiomarkers | Inflammation | IsoCrUrinePex7mv    | Log urinary isoprostanes/creatinine exam 7, multivariable-adjusted        | <a href="http://www.ncbi.nlm.nih.gov/projects/gap/cgi-bin/analysis.cgi?id=pha001145">http://www.ncbi.nlm.nih.gov/projects/gap/cgi-bin/analysis.cgi?id=pha001145</a> |
| ITBiomarkers | Inflammation | MCP1ex7as           | Log monocyte chemoattractant protein 1 exam 7, age- & sex-adjusted        | <a href="http://www.ncbi.nlm.nih.gov/projects/gap/cgi-bin/analysis.cgi?id=pha001147">http://www.ncbi.nlm.nih.gov/projects/gap/cgi-bin/analysis.cgi?id=pha001147</a> |
| ITBiomarkers | Inflammation | MCP1ex7mv           | Log monocyte chemoattractant protein 1 exam 7, multivariable-adjusted     | <a href="http://www.ncbi.nlm.nih.gov/projects/gap/cgi-bin/analysis.cgi?id=pha001149">http://www.ncbi.nlm.nih.gov/projects/gap/cgi-bin/analysis.cgi?id=pha001149</a> |
| ITBiomarkers | Inflammation | MPOex7as            | Log myeloperoxidase exam 7, age- & sex-adjusted                           | <a href="http://www.ncbi.nlm.nih.gov/projects/gap/cgi-bin/analysis.cgi?id=pha001151">http://www.ncbi.nlm.nih.gov/projects/gap/cgi-bin/analysis.cgi?id=pha001151</a> |
| ITBiomarkers | Inflammation | MPOex7mv            | Log myeloperoxidase exam 7, multivariable-adjusted                        | <a href="http://www.ncbi.nlm.nih.gov/projects/gap/cgi-bin/analysis.cgi?id=pha001153">http://www.ncbi.nlm.nih.gov/projects/gap/cgi-bin/analysis.cgi?id=pha001153</a> |
| ITBiomarkers | Inflammation | OPGex7as            | Log osteoprotegerin exam 7, age- & sex-adjusted                           | <a href="http://www.ncbi.nlm.nih.gov/projects/gap/cgi-bin/analysis.cgi?id=pha001155">http://www.ncbi.nlm.nih.gov/projects/gap/cgi-bin/analysis.cgi?id=pha001155</a> |
| ITBiomarkers | Inflammation | OPGex7mv            | Log osteoprotegerin exam 7, multivariable-adjusted                        | <a href="http://www.ncbi.nlm.nih.gov/projects/gap/cgi-bin/analysis.cgi?id=pha001157">http://www.ncbi.nlm.nih.gov/projects/gap/cgi-bin/analysis.cgi?id=pha001157</a> |
| ITBiomarkers | Inflammation | Pselectinex7as      | Log P-selectin exam 7, age- & sex-adjusted                                | <a href="http://www.ncbi.nlm.nih.gov/projects/gap/cgi-bin/analysis.cgi?id=pha001159">http://www.ncbi.nlm.nih.gov/projects/gap/cgi-bin/analysis.cgi?id=pha001159</a> |
| ITBiomarkers | Inflammation | Pselectinex7mv      | Log P-selectin exam 7, multivariable-adjusted                             | <a href="http://www.ncbi.nlm.nih.gov/projects/gap/cgi-bin/analysis.cgi?id=pha001161">http://www.ncbi.nlm.nih.gov/projects/gap/cgi-bin/analysis.cgi?id=pha001161</a> |
| ITBiomarkers | Inflammation | TNFAex7as           | Log tumor necrosis factor alpha exam 7, age- & sex-adjusted               | <a href="http://www.ncbi.nlm.nih.gov/projects/gap/cgi-bin/analysis.cgi?id=pha001163">http://www.ncbi.nlm.nih.gov/projects/gap/cgi-bin/analysis.cgi?id=pha001163</a> |
| ITBiomarkers | Inflammation | TNFAex7mv           | Log tumor necrosis factor alpha exam 7, multivariable-adjusted            | <a href="http://www.ncbi.nlm.nih.gov/projects/gap/cgi-bin/analysis.cgi?id=pha001165">http://www.ncbi.nlm.nih.gov/projects/gap/cgi-bin/analysis.cgi?id=pha001165</a> |
| ITBiomarkers | Inflammation | TNFR1lex7as         | Log tumor necrosis factor receptor II exam 7, age- & sex-adjusted         | <a href="http://www.ncbi.nlm.nih.gov/projects/gap/cgi-bin/analysis.cgi?id=pha001167">http://www.ncbi.nlm.nih.gov/projects/gap/cgi-bin/analysis.cgi?id=pha001167</a> |
| ITBiomarkers | Inflammation | TNFR1lex7mv         | Log tumor necrosis factor receptor II exam 7 multivariable-adjusted       | <a href="http://www.ncbi.nlm.nih.gov/projects/gap/cgi-bin/analysis.cgi?id=pha001169">http://www.ncbi.nlm.nih.gov/projects/gap/cgi-bin/analysis.cgi?id=pha001169</a> |
| ITBiomarkers | LFT          | AlkPhosex2as        | Log alkaline phosphatase exam 2 age- & sex-adjusted                       | <a href="http://www.ncbi.nlm.nih.gov/projects/gap/cgi-bin/analysis.cgi?id=pha001179">http://www.ncbi.nlm.nih.gov/projects/gap/cgi-bin/analysis.cgi?id=pha001179</a> |
| ITBiomarkers | LFT          | AlkPhosex2mv        | Log alkaline phosphatase exam 2, multivariable-adjusted                   | <a href="http://www.ncbi.nlm.nih.gov/projects/gap/cgi-bin/analysis.cgi?id=pha001181">http://www.ncbi.nlm.nih.gov/projects/gap/cgi-bin/analysis.cgi?id=pha001181</a> |
| ITBiomarkers | LFT          | ALTex2as            | Log alanine transaminase exam 2, age- & sex-adjusted                      | <a href="http://www.ncbi.nlm.nih.gov/projects/gap/cgi-bin/analysis.cgi?id=pha001183">http://www.ncbi.nlm.nih.gov/projects/gap/cgi-bin/analysis.cgi?id=pha001183</a> |
| ITBiomarkers | LFT          | ALTex2mv            | Log alanine transaminase exam 2; multivariable-adjusted                   | <a href="http://www.ncbi.nlm.nih.gov/projects/gap/cgi-bin/analysis.cgi?id=pha001185">http://www.ncbi.nlm.nih.gov/projects/gap/cgi-bin/analysis.cgi?id=pha001185</a> |
| ITBiomarkers | LFT          | ASTex2as            | Log aspartate aminotransferase exam, age- & sex-adjusted                  | <a href="http://www.ncbi.nlm.nih.gov/projects/gap/cgi-bin/analysis.cgi?id=pha001187">http://www.ncbi.nlm.nih.gov/projects/gap/cgi-bin/analysis.cgi?id=pha001187</a> |
| ITBiomarkers | LFT          | ASTex2mv            | Log aspartate aminotransferase exam 2 multivariable-adjusted              | <a href="http://www.ncbi.nlm.nih.gov/projects/gap/cgi-bin/analysis.cgi?id=pha001189">http://www.ncbi.nlm.nih.gov/projects/gap/cgi-bin/analysis.cgi?id=pha001189</a> |
| ITBiomarkers | LFT          | Bilirubinex2as      | Log bilirubin exam 2, age- & sex-adjusted                                 | <a href="http://www.ncbi.nlm.nih.gov/projects/gap/cgi-bin/analysis.cgi?id=pha001191">http://www.ncbi.nlm.nih.gov/projects/gap/cgi-bin/analysis.cgi?id=pha001191</a> |
| ITBiomarkers | LFT          | Bilirubinex2mv      | Log bilirubin exam 2 multivariable                                        | <a href="http://www.ncbi.nlm.nih.gov/projects/gap/cgi-bin/analysis.cgi?id=pha001193">http://www.ncbi.nlm.nih.gov/projects/gap/cgi-bin/analysis.cgi?id=pha001193</a> |
| ITBiomarkers | LFT          | GGTex2as            | Log gamma-glutamyl transferase exam 2, age- & sex-adjusted                | <a href="http://www.ncbi.nlm.nih.gov/projects/gap/cgi-bin/analysis.cgi?id=pha001195">http://www.ncbi.nlm.nih.gov/projects/gap/cgi-bin/analysis.cgi?id=pha001195</a> |
| ITBiomarkers | LFT          | GGTex2mv            | Log Gamma-glutamyl transferase exam 2, Multivariable,adjusted             | <a href="http://www.ncbi.nlm.nih.gov/projects/gap/cgi-bin/analysis.cgi?id=pha001197">http://www.ncbi.nlm.nih.gov/projects/gap/cgi-bin/analysis.cgi?id=pha001197</a> |
| ITBiomarkers | Neurohumoral | ANPex6as            | Log atrial natriuretic peptide exam 6, age- & sex-adjusted Tobit-model    | <a href="http://www.ncbi.nlm.nih.gov/projects/gap/cgi-bin/analysis.cgi?id=pha001199">http://www.ncbi.nlm.nih.gov/projects/gap/cgi-bin/analysis.cgi?id=pha001199</a> |
| ITBiomarkers | Neurohumoral | ANPex6mv            | Log atrial natriuretic peptide exam 6, multivariable-adjusted Tobit model | <a href="http://www.ncbi.nlm.nih.gov/projects/gap/cgi-bin/analysis.cgi?id=pha001201">http://www.ncbi.nlm.nih.gov/projects/gap/cgi-bin/analysis.cgi?id=pha001201</a> |
| ITBiomarkers | Neurohumoral | BNPex6as            | Log brain natriuretic peptide exam 6, age- & sex-adjusted Tobit model     | <a href="http://www.ncbi.nlm.nih.gov/projects/gap/cgi-bin/analysis.cgi?id=pha001203">http://www.ncbi.nlm.nih.gov/projects/gap/cgi-bin/analysis.cgi?id=pha001203</a> |
| ITBiomarkers | Neurohumoral | BNPex6mv            | Log brain natriuretic peptide exam 6, multivariable-adjusted Tobit model  | <a href="http://www.ncbi.nlm.nih.gov/projects/gap/cgi-bin/analysis.cgi?id=pha001205">http://www.ncbi.nlm.nih.gov/projects/gap/cgi-bin/analysis.cgi?id=pha001205</a> |
| ITBiomarkers | Vitamins     | VitD25OHex6or7as    | 25(OH)-D exam 6 or 7, age & sex adjusted                                  | <a href="http://www.ncbi.nlm.nih.gov/projects/gap/cgi-bin/analysis.cgi?id=pha001207">http://www.ncbi.nlm.nih.gov/projects/gap/cgi-bin/analysis.cgi?id=pha001207</a> |
| ITBiomarkers | Vitamins     | VitD25OHex6or7mv    | 25(OH)-D exam 6 or 7, multivariable-adjusted; covariates from vit D exam  | <a href="http://www.ncbi.nlm.nih.gov/projects/gap/cgi-bin/analysis.cgi?id=pha001209">http://www.ncbi.nlm.nih.gov/projects/gap/cgi-bin/analysis.cgi?id=pha001209</a> |
| ITBiomarkers | Vitamins     | VitKPhylloqex6or7as | Vit K exam 6 or 7, age & sex adjusted, log transformed, no warfarin       | <a href="http://www.ncbi.nlm.nih.gov/projects/gap/cgi-bin/analysis.cgi?id=pha001211">http://www.ncbi.nlm.nih.gov/projects/gap/cgi-bin/analysis.cgi?id=pha001211</a> |
| ITBiomarkers | Vitamins     | VitKPhylloqex6or7mv | Vit K exam 6 or 7, multivariable-adjusted, log transformed, no warfarin   | <a href="http://www.ncbi.nlm.nih.gov/projects/gap/cgi-bin/analysis.cgi?id=pha001213">http://www.ncbi.nlm.nih.gov/projects/gap/cgi-bin/analysis.cgi?id=pha001213</a> |
| ITBiomarkers | Vitamins     | VitKPucOCex6or7as   | %ucOC, exam 6 or 7, age, sex adjust, log transformed; no warfarin         | <a href="http://www.ncbi.nlm.nih.gov/projects/gap/cgi-bin/analysis.cgi?id=pha001215">http://www.ncbi.nlm.nih.gov/projects/gap/cgi-bin/analysis.cgi?id=pha001215</a> |
| ITBiomarkers | Vitamins     | VitKPucOCex6or7mv   | %ucOC, exam 6 or 7, multivariable, log-transformed, no warfarin use       | <a href="http://www.ncbi.nlm.nih.gov/projects/gap/cgi-bin/analysis.cgi?id=pha001217">http://www.ncbi.nlm.nih.gov/projects/gap/cgi-bin/analysis.cgi?id=pha001217</a> |
| Metabolic    | Adiposity    | allbmi1602          | adj bmi, offsp 2 & cohort 16 exams                                        | <a href="http://www.ncbi.nlm.nih.gov/projects/gap/cgi-bin/analysis.cgi?id=pha000101">http://www.ncbi.nlm.nih.gov/projects/gap/cgi-bin/analysis.cgi?id=pha000101</a> |
| Metabolic    | Adiposity    | allbmi1803          | adj bmi, offsp 3 & cohort 18 exams                                        | <a href="http://www.ncbi.nlm.nih.gov/projects/gap/cgi-bin/analysis.cgi?id=pha000103">http://www.ncbi.nlm.nih.gov/projects/gap/cgi-bin/analysis.cgi?id=pha000103</a> |
| Metabolic    | Adiposity    | allbmi1x01          | adj bmi, offsp 1 & cohort 10 exams                                        | <a href="http://www.ncbi.nlm.nih.gov/projects/gap/cgi-bin/analysis.cgi?id=pha000105">http://www.ncbi.nlm.nih.gov/projects/gap/cgi-bin/analysis.cgi?id=pha000105</a> |
| Metabolic    | Adiposity    | allbmi2004          | adj bmi, offsp 4 & cohort 20 exams                                        | <a href="http://www.ncbi.nlm.nih.gov/projects/gap/cgi-bin/analysis.cgi?id=pha000107">http://www.ncbi.nlm.nih.gov/projects/gap/cgi-bin/analysis.cgi?id=pha000107</a> |



Online Table 2: Phenotypes Evaluated for Association using Family-based Analysis (FBAT)

| Group     | Category  | Trait Label     | Name                                                                | FBAT Link                                                                                                                                                           |
|-----------|-----------|-----------------|---------------------------------------------------------------------|---------------------------------------------------------------------------------------------------------------------------------------------------------------------|
| Metabolic | Adiposity | allbmi2205      | adj bmi, offsp 5 & cohort 22 exams                                  | <a href="http://www.ncbi.nlm.nih.gov/projects/gap/cgi-bin/analysis.cgi?id=pha000109">http://www.ncbi.nlm.nih.gov/projects/gap/cgi-bin/analysis.cgi?id=pha000109</a> |
| Metabolic | Adiposity | allbmi2406      | adj bmi, offsp 6 & cohort 24 exams                                  | <a href="http://www.ncbi.nlm.nih.gov/projects/gap/cgi-bin/analysis.cgi?id=pha000111">http://www.ncbi.nlm.nih.gov/projects/gap/cgi-bin/analysis.cgi?id=pha000111</a> |
| Metabolic | Adiposity | allbmi2607      | adj bmi, offsp 7 & cohort 26 exams                                  | <a href="http://www.ncbi.nlm.nih.gov/projects/gap/cgi-bin/analysis.cgi?id=pha000113">http://www.ncbi.nlm.nih.gov/projects/gap/cgi-bin/analysis.cgi?id=pha000113</a> |
| Metabolic | Adiposity | allchgmbi       | adj bmi change, offsp 1-7 & cohort exams 10-26                      | <a href="http://www.ncbi.nlm.nih.gov/projects/gap/cgi-bin/analysis.cgi?id=pha000115">http://www.ncbi.nlm.nih.gov/projects/gap/cgi-bin/analysis.cgi?id=pha000115</a> |
| Metabolic | Adiposity | allchgwt        | adj weight change, offsp 1-7 & cohort exams 10-26                   | <a href="http://www.ncbi.nlm.nih.gov/projects/gap/cgi-bin/analysis.cgi?id=pha000117">http://www.ncbi.nlm.nih.gov/projects/gap/cgi-bin/analysis.cgi?id=pha000117</a> |
| Metabolic | Adiposity | allhgt1602      | adj height, offsp 2 & cohort 16 exams                               | <a href="http://www.ncbi.nlm.nih.gov/projects/gap/cgi-bin/analysis.cgi?id=pha000119">http://www.ncbi.nlm.nih.gov/projects/gap/cgi-bin/analysis.cgi?id=pha000119</a> |
| Metabolic | Adiposity | allhgt1803      | adj height, offsp 3 & cohort 18 exams                               | <a href="http://www.ncbi.nlm.nih.gov/projects/gap/cgi-bin/analysis.cgi?id=pha000121">http://www.ncbi.nlm.nih.gov/projects/gap/cgi-bin/analysis.cgi?id=pha000121</a> |
| Metabolic | Adiposity | allhgt1x01      | adj height, offsp 1 & cohort 10 exams                               | <a href="http://www.ncbi.nlm.nih.gov/projects/gap/cgi-bin/analysis.cgi?id=pha000123">http://www.ncbi.nlm.nih.gov/projects/gap/cgi-bin/analysis.cgi?id=pha000123</a> |
| Metabolic | Adiposity | allhgt2004      | adj height, offsp 4 & cohort 20 exams                               | <a href="http://www.ncbi.nlm.nih.gov/projects/gap/cgi-bin/analysis.cgi?id=pha000125">http://www.ncbi.nlm.nih.gov/projects/gap/cgi-bin/analysis.cgi?id=pha000125</a> |
| Metabolic | Adiposity | allhgt2205      | adj height, offsp 5 & cohort 22 exams                               | <a href="http://www.ncbi.nlm.nih.gov/projects/gap/cgi-bin/analysis.cgi?id=pha000127">http://www.ncbi.nlm.nih.gov/projects/gap/cgi-bin/analysis.cgi?id=pha000127</a> |
| Metabolic | Adiposity | allhgt2406      | adj height, offsp 6 & cohort 24 exams                               | <a href="http://www.ncbi.nlm.nih.gov/projects/gap/cgi-bin/analysis.cgi?id=pha000129">http://www.ncbi.nlm.nih.gov/projects/gap/cgi-bin/analysis.cgi?id=pha000129</a> |
| Metabolic | Adiposity | allhgt2607      | adj height, offsp 7 & cohort 26 exams                               | <a href="http://www.ncbi.nlm.nih.gov/projects/gap/cgi-bin/analysis.cgi?id=pha000131">http://www.ncbi.nlm.nih.gov/projects/gap/cgi-bin/analysis.cgi?id=pha000131</a> |
| Metabolic | Adiposity | allmeanbmi      | adj mean bmi, offsp 1-7 & cohort 10,16,18,20,22,24,26 exams         | <a href="http://www.ncbi.nlm.nih.gov/projects/gap/cgi-bin/analysis.cgi?id=pha000133">http://www.ncbi.nlm.nih.gov/projects/gap/cgi-bin/analysis.cgi?id=pha000133</a> |
| Metabolic | Adiposity | allmeanhgt      | adj mean height, offsp 1-7 & cohort 10,16,18,20,22,24,26 exams      | <a href="http://www.ncbi.nlm.nih.gov/projects/gap/cgi-bin/analysis.cgi?id=pha000135">http://www.ncbi.nlm.nih.gov/projects/gap/cgi-bin/analysis.cgi?id=pha000135</a> |
| Metabolic | Adiposity | allmeanwgt      | adj mean weight, offsp 1-7 & cohort 10,16,18,20,22,24,26 exams      | <a href="http://www.ncbi.nlm.nih.gov/projects/gap/cgi-bin/analysis.cgi?id=pha000137">http://www.ncbi.nlm.nih.gov/projects/gap/cgi-bin/analysis.cgi?id=pha000137</a> |
| Metabolic | Adiposity | allochgwt       | adj waist change, offsp 4 to 7                                      | <a href="http://www.ncbi.nlm.nih.gov/projects/gap/cgi-bin/analysis.cgi?id=pha000139">http://www.ncbi.nlm.nih.gov/projects/gap/cgi-bin/analysis.cgi?id=pha000139</a> |
| Metabolic | Adiposity | allomeanwst     | adj mean waist, offsp 4 to 7                                        | <a href="http://www.ncbi.nlm.nih.gov/projects/gap/cgi-bin/analysis.cgi?id=pha000141">http://www.ncbi.nlm.nih.gov/projects/gap/cgi-bin/analysis.cgi?id=pha000141</a> |
| Metabolic | Adiposity | allowst0007     | adj waist, offsp 7                                                  | <a href="http://www.ncbi.nlm.nih.gov/projects/gap/cgi-bin/analysis.cgi?id=pha000143">http://www.ncbi.nlm.nih.gov/projects/gap/cgi-bin/analysis.cgi?id=pha000143</a> |
| Metabolic | Adiposity | allrankbmi1602  | rank adj bmi, offsp 2 & cohort 16 exams                             | <a href="http://www.ncbi.nlm.nih.gov/projects/gap/cgi-bin/analysis.cgi?id=pha000145">http://www.ncbi.nlm.nih.gov/projects/gap/cgi-bin/analysis.cgi?id=pha000145</a> |
| Metabolic | Adiposity | allrankbmi1803  | rank adj bmi, offsp 3 & cohort 18 exams                             | <a href="http://www.ncbi.nlm.nih.gov/projects/gap/cgi-bin/analysis.cgi?id=pha000147">http://www.ncbi.nlm.nih.gov/projects/gap/cgi-bin/analysis.cgi?id=pha000147</a> |
| Metabolic | Adiposity | allrankbmi1x01  | rank adj bmi, offsp 1 & cohort 10 exams                             | <a href="http://www.ncbi.nlm.nih.gov/projects/gap/cgi-bin/analysis.cgi?id=pha000149">http://www.ncbi.nlm.nih.gov/projects/gap/cgi-bin/analysis.cgi?id=pha000149</a> |
| Metabolic | Adiposity | allrankbmi2004  | rank adj bmi, offsp 4 & cohort 20 exams                             | <a href="http://www.ncbi.nlm.nih.gov/projects/gap/cgi-bin/analysis.cgi?id=pha000151">http://www.ncbi.nlm.nih.gov/projects/gap/cgi-bin/analysis.cgi?id=pha000151</a> |
| Metabolic | Adiposity | allrankbmi2205  | rank adj bmi, offsp 5 & cohort 22 exams                             | <a href="http://www.ncbi.nlm.nih.gov/projects/gap/cgi-bin/analysis.cgi?id=pha000153">http://www.ncbi.nlm.nih.gov/projects/gap/cgi-bin/analysis.cgi?id=pha000153</a> |
| Metabolic | Adiposity | allrankbmi2406  | rank adj bmi, offsp 6 & cohort 24 exams                             | <a href="http://www.ncbi.nlm.nih.gov/projects/gap/cgi-bin/analysis.cgi?id=pha000155">http://www.ncbi.nlm.nih.gov/projects/gap/cgi-bin/analysis.cgi?id=pha000155</a> |
| Metabolic | Adiposity | allrankbmi2607  | rank adj bmi, offsp 7 & cohort 26 exams                             | <a href="http://www.ncbi.nlm.nih.gov/projects/gap/cgi-bin/analysis.cgi?id=pha000157">http://www.ncbi.nlm.nih.gov/projects/gap/cgi-bin/analysis.cgi?id=pha000157</a> |
| Metabolic | Adiposity | allrankchgmbi   | rank adj bmi change, offsp 1-7 & cohort exams 10-26                 | <a href="http://www.ncbi.nlm.nih.gov/projects/gap/cgi-bin/analysis.cgi?id=pha000159">http://www.ncbi.nlm.nih.gov/projects/gap/cgi-bin/analysis.cgi?id=pha000159</a> |
| Metabolic | Adiposity | allrankchgwt    | rank adj weight change, offsp 1-7 & cohort exams 10-26              | <a href="http://www.ncbi.nlm.nih.gov/projects/gap/cgi-bin/analysis.cgi?id=pha000161">http://www.ncbi.nlm.nih.gov/projects/gap/cgi-bin/analysis.cgi?id=pha000161</a> |
| Metabolic | Adiposity | allrankmeanbmi  | rank adj mean bmi, offsp 1-7 & cohort 10,16,18,20,22,24,26 exams    | <a href="http://www.ncbi.nlm.nih.gov/projects/gap/cgi-bin/analysis.cgi?id=pha000163">http://www.ncbi.nlm.nih.gov/projects/gap/cgi-bin/analysis.cgi?id=pha000163</a> |
| Metabolic | Adiposity | allrankmeanwgt  | rank adj mean weight, offsp 1-7 & cohort 10,16,18,20,22,24,26 exams | <a href="http://www.ncbi.nlm.nih.gov/projects/gap/cgi-bin/analysis.cgi?id=pha000165">http://www.ncbi.nlm.nih.gov/projects/gap/cgi-bin/analysis.cgi?id=pha000165</a> |
| Metabolic | Adiposity | allrankochgwt   | rank adj waist change, offsp 4 to 7                                 | <a href="http://www.ncbi.nlm.nih.gov/projects/gap/cgi-bin/analysis.cgi?id=pha000167">http://www.ncbi.nlm.nih.gov/projects/gap/cgi-bin/analysis.cgi?id=pha000167</a> |
| Metabolic | Adiposity | allrankomeanwst | rank adj mean waist, offsp 4 to 7                                   | <a href="http://www.ncbi.nlm.nih.gov/projects/gap/cgi-bin/analysis.cgi?id=pha000169">http://www.ncbi.nlm.nih.gov/projects/gap/cgi-bin/analysis.cgi?id=pha000169</a> |
| Metabolic | Adiposity | allrankwgt1602  | rank adj weight, offsp 2 & cohort 16 exams                          | <a href="http://www.ncbi.nlm.nih.gov/projects/gap/cgi-bin/analysis.cgi?id=pha000171">http://www.ncbi.nlm.nih.gov/projects/gap/cgi-bin/analysis.cgi?id=pha000171</a> |
| Metabolic | Adiposity | allrankwgt1803  | rank adj weight, offsp 3 & cohort 18 exams                          | <a href="http://www.ncbi.nlm.nih.gov/projects/gap/cgi-bin/analysis.cgi?id=pha000173">http://www.ncbi.nlm.nih.gov/projects/gap/cgi-bin/analysis.cgi?id=pha000173</a> |
| Metabolic | Adiposity | allrankwgt1x01  | rank adj weight, offsp 1 & cohort 10 exams                          | <a href="http://www.ncbi.nlm.nih.gov/projects/gap/cgi-bin/analysis.cgi?id=pha000175">http://www.ncbi.nlm.nih.gov/projects/gap/cgi-bin/analysis.cgi?id=pha000175</a> |
| Metabolic | Adiposity | allrankwgt2004  | rank adj weight, offsp 4 & cohort 20 exams                          | <a href="http://www.ncbi.nlm.nih.gov/projects/gap/cgi-bin/analysis.cgi?id=pha000177">http://www.ncbi.nlm.nih.gov/projects/gap/cgi-bin/analysis.cgi?id=pha000177</a> |
| Metabolic | Adiposity | allrankwgt2205  | rank adj weight, offsp 5 & cohort 22 exams                          | <a href="http://www.ncbi.nlm.nih.gov/projects/gap/cgi-bin/analysis.cgi?id=pha000179">http://www.ncbi.nlm.nih.gov/projects/gap/cgi-bin/analysis.cgi?id=pha000179</a> |
| Metabolic | Adiposity | allrankwgt2406  | rank adj weight, offsp 6 & cohort 24 exams                          | <a href="http://www.ncbi.nlm.nih.gov/projects/gap/cgi-bin/analysis.cgi?id=pha000181">http://www.ncbi.nlm.nih.gov/projects/gap/cgi-bin/analysis.cgi?id=pha000181</a> |
| Metabolic | Adiposity | allrankwgt2607  | rank adj weight, offsp 7 & cohort 26 exams                          | <a href="http://www.ncbi.nlm.nih.gov/projects/gap/cgi-bin/analysis.cgi?id=pha000183">http://www.ncbi.nlm.nih.gov/projects/gap/cgi-bin/analysis.cgi?id=pha000183</a> |
| Metabolic | Adiposity | allrankwst2306  | rank adj waist, offsp 6 & cohort exam 23                            | <a href="http://www.ncbi.nlm.nih.gov/projects/gap/cgi-bin/analysis.cgi?id=pha000185">http://www.ncbi.nlm.nih.gov/projects/gap/cgi-bin/analysis.cgi?id=pha000185</a> |
| Metabolic | Adiposity | allwgt1602      | adj weight, offsp 2 & cohort 16 exams                               | <a href="http://www.ncbi.nlm.nih.gov/projects/gap/cgi-bin/analysis.cgi?id=pha000187">http://www.ncbi.nlm.nih.gov/projects/gap/cgi-bin/analysis.cgi?id=pha000187</a> |
| Metabolic | Adiposity | allwgt1803      | adj weight, offsp 3 & cohort 18 exams                               | <a href="http://www.ncbi.nlm.nih.gov/projects/gap/cgi-bin/analysis.cgi?id=pha000189">http://www.ncbi.nlm.nih.gov/projects/gap/cgi-bin/analysis.cgi?id=pha000189</a> |
| Metabolic | Adiposity | allwgt1x01      | adj weight, offsp 1 & cohort 10 exams                               | <a href="http://www.ncbi.nlm.nih.gov/projects/gap/cgi-bin/analysis.cgi?id=pha000191">http://www.ncbi.nlm.nih.gov/projects/gap/cgi-bin/analysis.cgi?id=pha000191</a> |
| Metabolic | Adiposity | allwgt2004      | adj weight, offsp 4 & cohort 20 exams                               | <a href="http://www.ncbi.nlm.nih.gov/projects/gap/cgi-bin/analysis.cgi?id=pha000193">http://www.ncbi.nlm.nih.gov/projects/gap/cgi-bin/analysis.cgi?id=pha000193</a> |
| Metabolic | Adiposity | allwgt2205      | adj weight, offsp 5 & cohort 22 exams                               | <a href="http://www.ncbi.nlm.nih.gov/projects/gap/cgi-bin/analysis.cgi?id=pha000195">http://www.ncbi.nlm.nih.gov/projects/gap/cgi-bin/analysis.cgi?id=pha000195</a> |
| Metabolic | Adiposity | allwgt2406      | adj weight, offsp 6 & cohort 24 exams                               | <a href="http://www.ncbi.nlm.nih.gov/projects/gap/cgi-bin/analysis.cgi?id=pha000197">http://www.ncbi.nlm.nih.gov/projects/gap/cgi-bin/analysis.cgi?id=pha000197</a> |
| Metabolic | Adiposity | allwgt2607      | adj weight, offsp 7 & cohort 26 exams                               | <a href="http://www.ncbi.nlm.nih.gov/projects/gap/cgi-bin/analysis.cgi?id=pha000199">http://www.ncbi.nlm.nih.gov/projects/gap/cgi-bin/analysis.cgi?id=pha000199</a> |
| Metabolic | Adiposity | allwst2004      | adj waist, offsp 4 & cohort 20 exams                                | <a href="http://www.ncbi.nlm.nih.gov/projects/gap/cgi-bin/analysis.cgi?id=pha000201">http://www.ncbi.nlm.nih.gov/projects/gap/cgi-bin/analysis.cgi?id=pha000201</a> |
| Metabolic | Adiposity | allwst2205      | adj waist, offsp 5 & cohort 22 exams                                | <a href="http://www.ncbi.nlm.nih.gov/projects/gap/cgi-bin/analysis.cgi?id=pha000203">http://www.ncbi.nlm.nih.gov/projects/gap/cgi-bin/analysis.cgi?id=pha000203</a> |
| Metabolic | Adiposity | allwst2306      | adj waist, offsp 6 & cohort exam 23                                 | <a href="http://www.ncbi.nlm.nih.gov/projects/gap/cgi-bin/analysis.cgi?id=pha000205">http://www.ncbi.nlm.nih.gov/projects/gap/cgi-bin/analysis.cgi?id=pha000205</a> |
| Metabolic | Adiposity | fembmi1602      | Female adj bmi, offsp 2 & cohort 16 exams                           | <a href="http://www.ncbi.nlm.nih.gov/projects/gap/cgi-bin/analysis.cgi?id=pha000207">http://www.ncbi.nlm.nih.gov/projects/gap/cgi-bin/analysis.cgi?id=pha000207</a> |
| Metabolic | Adiposity | fembmi1803      | Female adj bmi, offsp 3 & cohort 18 exams                           | <a href="http://www.ncbi.nlm.nih.gov/projects/gap/cgi-bin/analysis.cgi?id=pha000209">http://www.ncbi.nlm.nih.gov/projects/gap/cgi-bin/analysis.cgi?id=pha000209</a> |
| Metabolic | Adiposity | fembmi1x01      | Female adj bmi, offsp 1 & cohort 10 exams                           | <a href="http://www.ncbi.nlm.nih.gov/projects/gap/cgi-bin/analysis.cgi?id=pha000211">http://www.ncbi.nlm.nih.gov/projects/gap/cgi-bin/analysis.cgi?id=pha000211</a> |
| Metabolic | Adiposity | fembmi2004      | Female adj bmi, offsp 4 & cohort 20 exams                           | <a href="http://www.ncbi.nlm.nih.gov/projects/gap/cgi-bin/analysis.cgi?id=pha000213">http://www.ncbi.nlm.nih.gov/projects/gap/cgi-bin/analysis.cgi?id=pha000213</a> |
| Metabolic | Adiposity | fembmi2205      | Female adj bmi, offsp 5 & cohort 22 exams                           | <a href="http://www.ncbi.nlm.nih.gov/projects/gap/cgi-bin/analysis.cgi?id=pha000215">http://www.ncbi.nlm.nih.gov/projects/gap/cgi-bin/analysis.cgi?id=pha000215</a> |
| Metabolic | Adiposity | fembmi2406      | Female adj bmi, offsp 6 & cohort 24 exams                           | <a href="http://www.ncbi.nlm.nih.gov/projects/gap/cgi-bin/analysis.cgi?id=pha000217">http://www.ncbi.nlm.nih.gov/projects/gap/cgi-bin/analysis.cgi?id=pha000217</a> |
| Metabolic | Adiposity | fembmi2607      | Female adj bmi, offsp 7 & cohort 26 exams                           | <a href="http://www.ncbi.nlm.nih.gov/projects/gap/cgi-bin/analysis.cgi?id=pha000219">http://www.ncbi.nlm.nih.gov/projects/gap/cgi-bin/analysis.cgi?id=pha000219</a> |

Online Table 2: Phenotypes Evaluated for Association using Family-based Analysis (FBAT)

| Group     | Category  | Trait Label     | Name                                                                       | FBAT Link                                                                                                                                                           |
|-----------|-----------|-----------------|----------------------------------------------------------------------------|---------------------------------------------------------------------------------------------------------------------------------------------------------------------|
| Metabolic | Adiposity | femchgmbi       | Female adj bmi change, offsp 1-7 & cohort exams 10-26                      | <a href="http://www.ncbi.nlm.nih.gov/projects/gap/cgi-bin/analysis.cgi?id=pha000221">http://www.ncbi.nlm.nih.gov/projects/gap/cgi-bin/analysis.cgi?id=pha000221</a> |
| Metabolic | Adiposity | femchgwt        | Female adj weight change, offsp 1-7 & cohort exams 10-26                   | <a href="http://www.ncbi.nlm.nih.gov/projects/gap/cgi-bin/analysis.cgi?id=pha000223">http://www.ncbi.nlm.nih.gov/projects/gap/cgi-bin/analysis.cgi?id=pha000223</a> |
| Metabolic | Adiposity | femhgt1602      | Female adj height, offsp 2 & cohort 16 exams                               | <a href="http://www.ncbi.nlm.nih.gov/projects/gap/cgi-bin/analysis.cgi?id=pha000225">http://www.ncbi.nlm.nih.gov/projects/gap/cgi-bin/analysis.cgi?id=pha000225</a> |
| Metabolic | Adiposity | femhgt1803      | Female adj height, offsp 3 & cohort 18 exams                               | <a href="http://www.ncbi.nlm.nih.gov/projects/gap/cgi-bin/analysis.cgi?id=pha000227">http://www.ncbi.nlm.nih.gov/projects/gap/cgi-bin/analysis.cgi?id=pha000227</a> |
| Metabolic | Adiposity | femhgt1x01      | Female adj height, offsp 1 & cohort 10 exams                               | <a href="http://www.ncbi.nlm.nih.gov/projects/gap/cgi-bin/analysis.cgi?id=pha000229">http://www.ncbi.nlm.nih.gov/projects/gap/cgi-bin/analysis.cgi?id=pha000229</a> |
| Metabolic | Adiposity | femhgt2004      | Female adj height, offsp 4 & cohort 20 exams                               | <a href="http://www.ncbi.nlm.nih.gov/projects/gap/cgi-bin/analysis.cgi?id=pha000231">http://www.ncbi.nlm.nih.gov/projects/gap/cgi-bin/analysis.cgi?id=pha000231</a> |
| Metabolic | Adiposity | femhgt2205      | Female adj height, offsp 5 & cohort 22 exams                               | <a href="http://www.ncbi.nlm.nih.gov/projects/gap/cgi-bin/analysis.cgi?id=pha000233">http://www.ncbi.nlm.nih.gov/projects/gap/cgi-bin/analysis.cgi?id=pha000233</a> |
| Metabolic | Adiposity | femhgt2406      | Female adj height, offsp 6 & cohort 24 exams                               | <a href="http://www.ncbi.nlm.nih.gov/projects/gap/cgi-bin/analysis.cgi?id=pha000235">http://www.ncbi.nlm.nih.gov/projects/gap/cgi-bin/analysis.cgi?id=pha000235</a> |
| Metabolic | Adiposity | femhgt2607      | Female adj height, offsp 7 & cohort 26 exams                               | <a href="http://www.ncbi.nlm.nih.gov/projects/gap/cgi-bin/analysis.cgi?id=pha000237">http://www.ncbi.nlm.nih.gov/projects/gap/cgi-bin/analysis.cgi?id=pha000237</a> |
| Metabolic | Adiposity | femmeanbmi      | Female adj mean bmi, offsp 1-7 & cohort 10,16,18,20,22,24,26 exams         | <a href="http://www.ncbi.nlm.nih.gov/projects/gap/cgi-bin/analysis.cgi?id=pha000239">http://www.ncbi.nlm.nih.gov/projects/gap/cgi-bin/analysis.cgi?id=pha000239</a> |
| Metabolic | Adiposity | femmeanhgt      | Female adj mean height, offsp 1-7 & cohort 10,16,18,20,22,24,26 exams      | <a href="http://www.ncbi.nlm.nih.gov/projects/gap/cgi-bin/analysis.cgi?id=pha000241">http://www.ncbi.nlm.nih.gov/projects/gap/cgi-bin/analysis.cgi?id=pha000241</a> |
| Metabolic | Adiposity | femmeanwgt      | Female adj mean weight, offsp 1-7 & cohort 10,16,18,20,22,24,26 exams      | <a href="http://www.ncbi.nlm.nih.gov/projects/gap/cgi-bin/analysis.cgi?id=pha000243">http://www.ncbi.nlm.nih.gov/projects/gap/cgi-bin/analysis.cgi?id=pha000243</a> |
| Metabolic | Adiposity | femochgwst      | Female adj waist change, offsp 4 to 7                                      | <a href="http://www.ncbi.nlm.nih.gov/projects/gap/cgi-bin/analysis.cgi?id=pha000245">http://www.ncbi.nlm.nih.gov/projects/gap/cgi-bin/analysis.cgi?id=pha000245</a> |
| Metabolic | Adiposity | femomeanwst     | Female adj mean waist, offsp 4 to 7                                        | <a href="http://www.ncbi.nlm.nih.gov/projects/gap/cgi-bin/analysis.cgi?id=pha000247">http://www.ncbi.nlm.nih.gov/projects/gap/cgi-bin/analysis.cgi?id=pha000247</a> |
| Metabolic | Adiposity | femowst0007     | Female adj waist, offsp 7                                                  | <a href="http://www.ncbi.nlm.nih.gov/projects/gap/cgi-bin/analysis.cgi?id=pha000249">http://www.ncbi.nlm.nih.gov/projects/gap/cgi-bin/analysis.cgi?id=pha000249</a> |
| Metabolic | Adiposity | femrankbmi1602  | Female rank adj bmi, offsp 2 & cohort 16 exams                             | <a href="http://www.ncbi.nlm.nih.gov/projects/gap/cgi-bin/analysis.cgi?id=pha000251">http://www.ncbi.nlm.nih.gov/projects/gap/cgi-bin/analysis.cgi?id=pha000251</a> |
| Metabolic | Adiposity | femrankbmi1803  | Female rank adj bmi, offsp 3 & cohort 18 exams                             | <a href="http://www.ncbi.nlm.nih.gov/projects/gap/cgi-bin/analysis.cgi?id=pha000253">http://www.ncbi.nlm.nih.gov/projects/gap/cgi-bin/analysis.cgi?id=pha000253</a> |
| Metabolic | Adiposity | femrankbmi1x01  | Female rank adj bmi, offsp 1 & cohort 10 exams                             | <a href="http://www.ncbi.nlm.nih.gov/projects/gap/cgi-bin/analysis.cgi?id=pha000255">http://www.ncbi.nlm.nih.gov/projects/gap/cgi-bin/analysis.cgi?id=pha000255</a> |
| Metabolic | Adiposity | femrankbmi2004  | Female rank adj bmi, offsp 4 & cohort 20 exams                             | <a href="http://www.ncbi.nlm.nih.gov/projects/gap/cgi-bin/analysis.cgi?id=pha000257">http://www.ncbi.nlm.nih.gov/projects/gap/cgi-bin/analysis.cgi?id=pha000257</a> |
| Metabolic | Adiposity | femrankbmi2205  | Female rank adj bmi, offsp 5 & cohort 22 exams                             | <a href="http://www.ncbi.nlm.nih.gov/projects/gap/cgi-bin/analysis.cgi?id=pha000259">http://www.ncbi.nlm.nih.gov/projects/gap/cgi-bin/analysis.cgi?id=pha000259</a> |
| Metabolic | Adiposity | femrankbmi2406  | Female rank adj bmi, offsp 6 & cohort 24 exams                             | <a href="http://www.ncbi.nlm.nih.gov/projects/gap/cgi-bin/analysis.cgi?id=pha000261">http://www.ncbi.nlm.nih.gov/projects/gap/cgi-bin/analysis.cgi?id=pha000261</a> |
| Metabolic | Adiposity | femrankbmi2607  | Female rank adj bmi, offsp 7 & cohort 26 exams                             | <a href="http://www.ncbi.nlm.nih.gov/projects/gap/cgi-bin/analysis.cgi?id=pha000263">http://www.ncbi.nlm.nih.gov/projects/gap/cgi-bin/analysis.cgi?id=pha000263</a> |
| Metabolic | Adiposity | femrankchgwt    | Female rank adj weight change, offsp 1-7 & cohort exams 10-26              | <a href="http://www.ncbi.nlm.nih.gov/projects/gap/cgi-bin/analysis.cgi?id=pha000265">http://www.ncbi.nlm.nih.gov/projects/gap/cgi-bin/analysis.cgi?id=pha000265</a> |
| Metabolic | Adiposity | femrankmeanbmi  | Female rank adj mean bmi, offsp 1-7 & cohort 10,16,18,20,22,24,26 exams    | <a href="http://www.ncbi.nlm.nih.gov/projects/gap/cgi-bin/analysis.cgi?id=pha000267">http://www.ncbi.nlm.nih.gov/projects/gap/cgi-bin/analysis.cgi?id=pha000267</a> |
| Metabolic | Adiposity | femrankmeanwgt  | Female rank adj mean weight, offsp 1-7 & cohort 10,16,18,20,22,24,26 exams | <a href="http://www.ncbi.nlm.nih.gov/projects/gap/cgi-bin/analysis.cgi?id=pha000269">http://www.ncbi.nlm.nih.gov/projects/gap/cgi-bin/analysis.cgi?id=pha000269</a> |
| Metabolic | Adiposity | femrankomeanwst | Female rank adj mean waist, offsp 4 to 7                                   | <a href="http://www.ncbi.nlm.nih.gov/projects/gap/cgi-bin/analysis.cgi?id=pha000271">http://www.ncbi.nlm.nih.gov/projects/gap/cgi-bin/analysis.cgi?id=pha000271</a> |
| Metabolic | Adiposity | femrankwgt1602  | Female rank adj weight, offsp 2 & cohort 16 exams                          | <a href="http://www.ncbi.nlm.nih.gov/projects/gap/cgi-bin/analysis.cgi?id=pha000273">http://www.ncbi.nlm.nih.gov/projects/gap/cgi-bin/analysis.cgi?id=pha000273</a> |
| Metabolic | Adiposity | femrankwgt1803  | Female rank adj weight, offsp 3 & cohort 18 exams                          | <a href="http://www.ncbi.nlm.nih.gov/projects/gap/cgi-bin/analysis.cgi?id=pha000275">http://www.ncbi.nlm.nih.gov/projects/gap/cgi-bin/analysis.cgi?id=pha000275</a> |
| Metabolic | Adiposity | femrankwgt1x01  | Female rank adj weight, offsp 1 & cohort 10 exams                          | <a href="http://www.ncbi.nlm.nih.gov/projects/gap/cgi-bin/analysis.cgi?id=pha000277">http://www.ncbi.nlm.nih.gov/projects/gap/cgi-bin/analysis.cgi?id=pha000277</a> |
| Metabolic | Adiposity | femrankwgt2004  | Female rank adj weight, offsp 4 & cohort 20 exams                          | <a href="http://www.ncbi.nlm.nih.gov/projects/gap/cgi-bin/analysis.cgi?id=pha000279">http://www.ncbi.nlm.nih.gov/projects/gap/cgi-bin/analysis.cgi?id=pha000279</a> |
| Metabolic | Adiposity | femrankwgt2205  | Female rank adj weight, offsp 5 & cohort 22 exams                          | <a href="http://www.ncbi.nlm.nih.gov/projects/gap/cgi-bin/analysis.cgi?id=pha000281">http://www.ncbi.nlm.nih.gov/projects/gap/cgi-bin/analysis.cgi?id=pha000281</a> |
| Metabolic | Adiposity | femrankwgt2406  | Female rank adj weight, offsp 6 & cohort 24 exams                          | <a href="http://www.ncbi.nlm.nih.gov/projects/gap/cgi-bin/analysis.cgi?id=pha000283">http://www.ncbi.nlm.nih.gov/projects/gap/cgi-bin/analysis.cgi?id=pha000283</a> |
| Metabolic | Adiposity | femrankwgt2607  | Female rank adj weight, offsp 7 & cohort 26 exams                          | <a href="http://www.ncbi.nlm.nih.gov/projects/gap/cgi-bin/analysis.cgi?id=pha000285">http://www.ncbi.nlm.nih.gov/projects/gap/cgi-bin/analysis.cgi?id=pha000285</a> |
| Metabolic | Adiposity | femwgt1602      | Female adj weight, offsp 2 & cohort 16 exams                               | <a href="http://www.ncbi.nlm.nih.gov/projects/gap/cgi-bin/analysis.cgi?id=pha000287">http://www.ncbi.nlm.nih.gov/projects/gap/cgi-bin/analysis.cgi?id=pha000287</a> |
| Metabolic | Adiposity | femwgt1803      | Female adj weight, offsp 3 & cohort 18 exams                               | <a href="http://www.ncbi.nlm.nih.gov/projects/gap/cgi-bin/analysis.cgi?id=pha000289">http://www.ncbi.nlm.nih.gov/projects/gap/cgi-bin/analysis.cgi?id=pha000289</a> |
| Metabolic | Adiposity | femwgt1x01      | Female adj weight, offsp 1 & cohort 10 exams                               | <a href="http://www.ncbi.nlm.nih.gov/projects/gap/cgi-bin/analysis.cgi?id=pha000291">http://www.ncbi.nlm.nih.gov/projects/gap/cgi-bin/analysis.cgi?id=pha000291</a> |
| Metabolic | Adiposity | femwgt2004      | Female adj weight, offsp 4 & cohort 20 exams                               | <a href="http://www.ncbi.nlm.nih.gov/projects/gap/cgi-bin/analysis.cgi?id=pha000293">http://www.ncbi.nlm.nih.gov/projects/gap/cgi-bin/analysis.cgi?id=pha000293</a> |
| Metabolic | Adiposity | femwgt2205      | Female adj weight, offsp 5 & cohort 22 exams                               | <a href="http://www.ncbi.nlm.nih.gov/projects/gap/cgi-bin/analysis.cgi?id=pha000295">http://www.ncbi.nlm.nih.gov/projects/gap/cgi-bin/analysis.cgi?id=pha000295</a> |
| Metabolic | Adiposity | femwgt2406      | Female adj weight, offsp 6 & cohort 24 exams                               | <a href="http://www.ncbi.nlm.nih.gov/projects/gap/cgi-bin/analysis.cgi?id=pha000297">http://www.ncbi.nlm.nih.gov/projects/gap/cgi-bin/analysis.cgi?id=pha000297</a> |
| Metabolic | Adiposity | femwgt2607      | Female adj weight, offsp 7 & cohort 26 exams                               | <a href="http://www.ncbi.nlm.nih.gov/projects/gap/cgi-bin/analysis.cgi?id=pha000299">http://www.ncbi.nlm.nih.gov/projects/gap/cgi-bin/analysis.cgi?id=pha000299</a> |
| Metabolic | Adiposity | femwst2004      | Female adj waist, offsp 4 & cohort 20 exams                                | <a href="http://www.ncbi.nlm.nih.gov/projects/gap/cgi-bin/analysis.cgi?id=pha000301">http://www.ncbi.nlm.nih.gov/projects/gap/cgi-bin/analysis.cgi?id=pha000301</a> |
| Metabolic | Adiposity | femwst2205      | Female adj waist, offsp 5 & cohort 22 exams                                | <a href="http://www.ncbi.nlm.nih.gov/projects/gap/cgi-bin/analysis.cgi?id=pha000303">http://www.ncbi.nlm.nih.gov/projects/gap/cgi-bin/analysis.cgi?id=pha000303</a> |
| Metabolic | Adiposity | femwst2306      | Female adj waist, offsp 6 & cohort exam 23                                 | <a href="http://www.ncbi.nlm.nih.gov/projects/gap/cgi-bin/analysis.cgi?id=pha000305">http://www.ncbi.nlm.nih.gov/projects/gap/cgi-bin/analysis.cgi?id=pha000305</a> |
| Metabolic | Adiposity | malebmi1602     | Male adj bmi, offsp 2 & cohort 16 exams                                    | <a href="http://www.ncbi.nlm.nih.gov/projects/gap/cgi-bin/analysis.cgi?id=pha000307">http://www.ncbi.nlm.nih.gov/projects/gap/cgi-bin/analysis.cgi?id=pha000307</a> |
| Metabolic | Adiposity | malebmi1803     | Male adj bmi, offsp 3 & cohort 18 exams                                    | <a href="http://www.ncbi.nlm.nih.gov/projects/gap/cgi-bin/analysis.cgi?id=pha000309">http://www.ncbi.nlm.nih.gov/projects/gap/cgi-bin/analysis.cgi?id=pha000309</a> |
| Metabolic | Adiposity | malebmi1x01     | Male adj bmi, offsp 1 & cohort 10 exams                                    | <a href="http://www.ncbi.nlm.nih.gov/projects/gap/cgi-bin/analysis.cgi?id=pha000311">http://www.ncbi.nlm.nih.gov/projects/gap/cgi-bin/analysis.cgi?id=pha000311</a> |
| Metabolic | Adiposity | malebmi2004     | Male adj bmi, offsp 4 & cohort 20 exams                                    | <a href="http://www.ncbi.nlm.nih.gov/projects/gap/cgi-bin/analysis.cgi?id=pha000313">http://www.ncbi.nlm.nih.gov/projects/gap/cgi-bin/analysis.cgi?id=pha000313</a> |
| Metabolic | Adiposity | malebmi2205     | Male adj bmi, offsp 5 & cohort 22 exams                                    | <a href="http://www.ncbi.nlm.nih.gov/projects/gap/cgi-bin/analysis.cgi?id=pha000315">http://www.ncbi.nlm.nih.gov/projects/gap/cgi-bin/analysis.cgi?id=pha000315</a> |
| Metabolic | Adiposity | malebmi2406     | Male adj bmi, offsp 6 & cohort 24 exams                                    | <a href="http://www.ncbi.nlm.nih.gov/projects/gap/cgi-bin/analysis.cgi?id=pha000317">http://www.ncbi.nlm.nih.gov/projects/gap/cgi-bin/analysis.cgi?id=pha000317</a> |
| Metabolic | Adiposity | malebmi2607     | Male adj bmi, offsp 7 & cohort 26 exams                                    | <a href="http://www.ncbi.nlm.nih.gov/projects/gap/cgi-bin/analysis.cgi?id=pha000319">http://www.ncbi.nlm.nih.gov/projects/gap/cgi-bin/analysis.cgi?id=pha000319</a> |
| Metabolic | Adiposity | malechgmbi      | Male adj bmi change, offsp 1-7 & cohort exams 10-26                        | <a href="http://www.ncbi.nlm.nih.gov/projects/gap/cgi-bin/analysis.cgi?id=pha000321">http://www.ncbi.nlm.nih.gov/projects/gap/cgi-bin/analysis.cgi?id=pha000321</a> |
| Metabolic | Adiposity | malechgwt       | Male adj weight change, offsp 1-7 & cohort exams 10-26                     | <a href="http://www.ncbi.nlm.nih.gov/projects/gap/cgi-bin/analysis.cgi?id=pha000323">http://www.ncbi.nlm.nih.gov/projects/gap/cgi-bin/analysis.cgi?id=pha000323</a> |
| Metabolic | Adiposity | malehgt1602     | Male adj height, offsp 2 & cohort 16 exams                                 | <a href="http://www.ncbi.nlm.nih.gov/projects/gap/cgi-bin/analysis.cgi?id=pha000325">http://www.ncbi.nlm.nih.gov/projects/gap/cgi-bin/analysis.cgi?id=pha000325</a> |
| Metabolic | Adiposity | malehgt1803     | Male adj height, offsp 3 & cohort 18 exams                                 | <a href="http://www.ncbi.nlm.nih.gov/projects/gap/cgi-bin/analysis.cgi?id=pha000327">http://www.ncbi.nlm.nih.gov/projects/gap/cgi-bin/analysis.cgi?id=pha000327</a> |
| Metabolic | Adiposity | malehgt1x01     | Male adj height, offsp 1 & cohort 10 exams                                 | <a href="http://www.ncbi.nlm.nih.gov/projects/gap/cgi-bin/analysis.cgi?id=pha000329">http://www.ncbi.nlm.nih.gov/projects/gap/cgi-bin/analysis.cgi?id=pha000329</a> |
| Metabolic | Adiposity | malehgt2004     | Male adj height, offsp 4 & cohort 20 exams                                 | <a href="http://www.ncbi.nlm.nih.gov/projects/gap/cgi-bin/analysis.cgi?id=pha000331">http://www.ncbi.nlm.nih.gov/projects/gap/cgi-bin/analysis.cgi?id=pha000331</a> |

Online Table 2: Phenotypes Evaluated for Association using Family-based Analysis (FBAT)

| Group     | Category  | Trait Label        | Name                                                                       | FBAT Link                                                                                                                                                           |
|-----------|-----------|--------------------|----------------------------------------------------------------------------|---------------------------------------------------------------------------------------------------------------------------------------------------------------------|
| Metabolic | Adiposity | malehgt2205        | Male adj height, offsp 5 & cohort 22 exams                                 | <a href="http://www.ncbi.nlm.nih.gov/projects/gap/cgi-bin/analysis.cgi?id=pha000333">http://www.ncbi.nlm.nih.gov/projects/gap/cgi-bin/analysis.cgi?id=pha000333</a> |
| Metabolic | Adiposity | malehgt2406        | Male adj height, offsp 6 & cohort 24 exams                                 | <a href="http://www.ncbi.nlm.nih.gov/projects/gap/cgi-bin/analysis.cgi?id=pha000335">http://www.ncbi.nlm.nih.gov/projects/gap/cgi-bin/analysis.cgi?id=pha000335</a> |
| Metabolic | Adiposity | malehgt2607        | Male adj height, offsp 7 & cohort 26 exams                                 | <a href="http://www.ncbi.nlm.nih.gov/projects/gap/cgi-bin/analysis.cgi?id=pha000337">http://www.ncbi.nlm.nih.gov/projects/gap/cgi-bin/analysis.cgi?id=pha000337</a> |
| Metabolic | Adiposity | malemeanbmi        | Male adj mean bmi, offsp 1-7 & cohort 10,16,18,20,22,24,26 exams           | <a href="http://www.ncbi.nlm.nih.gov/projects/gap/cgi-bin/analysis.cgi?id=pha000339">http://www.ncbi.nlm.nih.gov/projects/gap/cgi-bin/analysis.cgi?id=pha000339</a> |
| Metabolic | Adiposity | malemeanhgt        | Male adj mean hgt, offsp 1-7 & cohort 10,16,18,20,22,24,26 exams           | <a href="http://www.ncbi.nlm.nih.gov/projects/gap/cgi-bin/analysis.cgi?id=pha000341">http://www.ncbi.nlm.nih.gov/projects/gap/cgi-bin/analysis.cgi?id=pha000341</a> |
| Metabolic | Adiposity | malemeanwgt        | Male adj mean weight, offsp 1-7 & cohort 10,16,18,20,22,24,26 exams        | <a href="http://www.ncbi.nlm.nih.gov/projects/gap/cgi-bin/analysis.cgi?id=pha000343">http://www.ncbi.nlm.nih.gov/projects/gap/cgi-bin/analysis.cgi?id=pha000343</a> |
| Metabolic | Adiposity | maleochgwt         | Male adj waist change, offsp 4 to 7                                        | <a href="http://www.ncbi.nlm.nih.gov/projects/gap/cgi-bin/analysis.cgi?id=pha000345">http://www.ncbi.nlm.nih.gov/projects/gap/cgi-bin/analysis.cgi?id=pha000345</a> |
| Metabolic | Adiposity | maleomeanwst       | Male adj mean waist, offsp 4 to 7                                          | <a href="http://www.ncbi.nlm.nih.gov/projects/gap/cgi-bin/analysis.cgi?id=pha000347">http://www.ncbi.nlm.nih.gov/projects/gap/cgi-bin/analysis.cgi?id=pha000347</a> |
| Metabolic | Adiposity | maleowst0007       | Male adj waist, offsp 7                                                    | <a href="http://www.ncbi.nlm.nih.gov/projects/gap/cgi-bin/analysis.cgi?id=pha000349">http://www.ncbi.nlm.nih.gov/projects/gap/cgi-bin/analysis.cgi?id=pha000349</a> |
| Metabolic | Adiposity | malerankbmi1602    | Male rank adj bmi, offsp 2 & cohort 16 exams                               | <a href="http://www.ncbi.nlm.nih.gov/projects/gap/cgi-bin/analysis.cgi?id=pha000351">http://www.ncbi.nlm.nih.gov/projects/gap/cgi-bin/analysis.cgi?id=pha000351</a> |
| Metabolic | Adiposity | malerankbmi1803    | Male rank adj bmi, offsp 3 & cohort 18 exams                               | <a href="http://www.ncbi.nlm.nih.gov/projects/gap/cgi-bin/analysis.cgi?id=pha000353">http://www.ncbi.nlm.nih.gov/projects/gap/cgi-bin/analysis.cgi?id=pha000353</a> |
| Metabolic | Adiposity | malerankbmi2004    | Male rank adj bmi, offsp 4 & cohort 20 exams                               | <a href="http://www.ncbi.nlm.nih.gov/projects/gap/cgi-bin/analysis.cgi?id=pha000355">http://www.ncbi.nlm.nih.gov/projects/gap/cgi-bin/analysis.cgi?id=pha000355</a> |
| Metabolic | Adiposity | malerankbmi2205    | Male rank adj bmi, offsp 5 & cohort 22 exams                               | <a href="http://www.ncbi.nlm.nih.gov/projects/gap/cgi-bin/analysis.cgi?id=pha000357">http://www.ncbi.nlm.nih.gov/projects/gap/cgi-bin/analysis.cgi?id=pha000357</a> |
| Metabolic | Adiposity | malerankbmi2406    | Male rank adj bmi, offsp 6 & cohort 24 exams                               | <a href="http://www.ncbi.nlm.nih.gov/projects/gap/cgi-bin/analysis.cgi?id=pha000359">http://www.ncbi.nlm.nih.gov/projects/gap/cgi-bin/analysis.cgi?id=pha000359</a> |
| Metabolic | Adiposity | malerankbmi2607    | Male rank adj bmi, offsp 7 & cohort 26 exams                               | <a href="http://www.ncbi.nlm.nih.gov/projects/gap/cgi-bin/analysis.cgi?id=pha000361">http://www.ncbi.nlm.nih.gov/projects/gap/cgi-bin/analysis.cgi?id=pha000361</a> |
| Metabolic | Adiposity | malerankchgmbi     | Male rank adj bmi change, offsp 1-7 & cohort exams 10-26                   | <a href="http://www.ncbi.nlm.nih.gov/projects/gap/cgi-bin/analysis.cgi?id=pha000363">http://www.ncbi.nlm.nih.gov/projects/gap/cgi-bin/analysis.cgi?id=pha000363</a> |
| Metabolic | Adiposity | malerankchgwt      | Male rank adj weight change, offsp 1-7 & cohort exams 10-26                | <a href="http://www.ncbi.nlm.nih.gov/projects/gap/cgi-bin/analysis.cgi?id=pha000365">http://www.ncbi.nlm.nih.gov/projects/gap/cgi-bin/analysis.cgi?id=pha000365</a> |
| Metabolic | Adiposity | malerankhgt2406    | Male rank adj height, offsp 6 & cohort 24 exams                            | <a href="http://www.ncbi.nlm.nih.gov/projects/gap/cgi-bin/analysis.cgi?id=pha000367">http://www.ncbi.nlm.nih.gov/projects/gap/cgi-bin/analysis.cgi?id=pha000367</a> |
| Metabolic | Adiposity | malerankochgwt     | Male rank adj waist change, offsp 4 to 7                                   | <a href="http://www.ncbi.nlm.nih.gov/projects/gap/cgi-bin/analysis.cgi?id=pha000369">http://www.ncbi.nlm.nih.gov/projects/gap/cgi-bin/analysis.cgi?id=pha000369</a> |
| Metabolic | Adiposity | malerankwgt1602    | Male rank adj weight, offsp 2 & cohort 16 exams                            | <a href="http://www.ncbi.nlm.nih.gov/projects/gap/cgi-bin/analysis.cgi?id=pha000371">http://www.ncbi.nlm.nih.gov/projects/gap/cgi-bin/analysis.cgi?id=pha000371</a> |
| Metabolic | Adiposity | malerankwgt2004    | Male rank adj weight, offsp 4 & cohort 20 exams                            | <a href="http://www.ncbi.nlm.nih.gov/projects/gap/cgi-bin/analysis.cgi?id=pha000373">http://www.ncbi.nlm.nih.gov/projects/gap/cgi-bin/analysis.cgi?id=pha000373</a> |
| Metabolic | Adiposity | malerankwgt2205    | Male rank adj weight, offsp 5 & cohort 22 exams                            | <a href="http://www.ncbi.nlm.nih.gov/projects/gap/cgi-bin/analysis.cgi?id=pha000375">http://www.ncbi.nlm.nih.gov/projects/gap/cgi-bin/analysis.cgi?id=pha000375</a> |
| Metabolic | Adiposity | malerankwst2306    | Male rank adj waist, offsp 6 & cohort exam 23                              | <a href="http://www.ncbi.nlm.nih.gov/projects/gap/cgi-bin/analysis.cgi?id=pha000377">http://www.ncbi.nlm.nih.gov/projects/gap/cgi-bin/analysis.cgi?id=pha000377</a> |
| Metabolic | Adiposity | malewgt1602        | Male adj weight, offsp 2 & cohort 16 exams                                 | <a href="http://www.ncbi.nlm.nih.gov/projects/gap/cgi-bin/analysis.cgi?id=pha000379">http://www.ncbi.nlm.nih.gov/projects/gap/cgi-bin/analysis.cgi?id=pha000379</a> |
| Metabolic | Adiposity | malewgt1803        | Male adj weight, offsp 3 & cohort 18 exams                                 | <a href="http://www.ncbi.nlm.nih.gov/projects/gap/cgi-bin/analysis.cgi?id=pha000381">http://www.ncbi.nlm.nih.gov/projects/gap/cgi-bin/analysis.cgi?id=pha000381</a> |
| Metabolic | Adiposity | malewgt1x01        | Male adj weight, offsp 1 & cohort 10 exams                                 | <a href="http://www.ncbi.nlm.nih.gov/projects/gap/cgi-bin/analysis.cgi?id=pha000383">http://www.ncbi.nlm.nih.gov/projects/gap/cgi-bin/analysis.cgi?id=pha000383</a> |
| Metabolic | Adiposity | malewgt2004        | Male adj weight, offsp 4 & cohort 20 exams                                 | <a href="http://www.ncbi.nlm.nih.gov/projects/gap/cgi-bin/analysis.cgi?id=pha000385">http://www.ncbi.nlm.nih.gov/projects/gap/cgi-bin/analysis.cgi?id=pha000385</a> |
| Metabolic | Adiposity | malewgt2205        | Male adj weight, offsp 5 & cohort 22 exams                                 | <a href="http://www.ncbi.nlm.nih.gov/projects/gap/cgi-bin/analysis.cgi?id=pha000387">http://www.ncbi.nlm.nih.gov/projects/gap/cgi-bin/analysis.cgi?id=pha000387</a> |
| Metabolic | Adiposity | malewgt2406        | Male adj weight, offsp 6 & cohort 24 exams                                 | <a href="http://www.ncbi.nlm.nih.gov/projects/gap/cgi-bin/analysis.cgi?id=pha000389">http://www.ncbi.nlm.nih.gov/projects/gap/cgi-bin/analysis.cgi?id=pha000389</a> |
| Metabolic | Adiposity | malewgt2607        | Male adj weight, offsp 7 & cohort 26 exams                                 | <a href="http://www.ncbi.nlm.nih.gov/projects/gap/cgi-bin/analysis.cgi?id=pha000391">http://www.ncbi.nlm.nih.gov/projects/gap/cgi-bin/analysis.cgi?id=pha000391</a> |
| Metabolic | Adiposity | malewst2004        | Male adj waist, offsp 4 & cohort 20 exams                                  | <a href="http://www.ncbi.nlm.nih.gov/projects/gap/cgi-bin/analysis.cgi?id=pha000393">http://www.ncbi.nlm.nih.gov/projects/gap/cgi-bin/analysis.cgi?id=pha000393</a> |
| Metabolic | Adiposity | malewst2205        | Male adj waist, offsp 5 & cohort 22 exams                                  | <a href="http://www.ncbi.nlm.nih.gov/projects/gap/cgi-bin/analysis.cgi?id=pha000395">http://www.ncbi.nlm.nih.gov/projects/gap/cgi-bin/analysis.cgi?id=pha000395</a> |
| Metabolic | Adiposity | malewst2306        | Male adj waist, offsp 6 & cohort exam 23                                   | <a href="http://www.ncbi.nlm.nih.gov/projects/gap/cgi-bin/analysis.cgi?id=pha000397">http://www.ncbi.nlm.nih.gov/projects/gap/cgi-bin/analysis.cgi?id=pha000397</a> |
| Metabolic | Adiposity | SATAS              | SAT adj for age, age sqr, sex                                              | <a href="http://www.ncbi.nlm.nih.gov/projects/gap/cgi-bin/analysis.cgi?id=pha000399">http://www.ncbi.nlm.nih.gov/projects/gap/cgi-bin/analysis.cgi?id=pha000399</a> |
| Metabolic | Adiposity | SATMV              | SAT adj for age, age square, sex, meno status, smoking                     | <a href="http://www.ncbi.nlm.nih.gov/projects/gap/cgi-bin/analysis.cgi?id=pha000401">http://www.ncbi.nlm.nih.gov/projects/gap/cgi-bin/analysis.cgi?id=pha000401</a> |
| Metabolic | Adiposity | SDAS               | Sagittal diameter adj for age, age square, sex                             | <a href="http://www.ncbi.nlm.nih.gov/projects/gap/cgi-bin/analysis.cgi?id=pha000403">http://www.ncbi.nlm.nih.gov/projects/gap/cgi-bin/analysis.cgi?id=pha000403</a> |
| Metabolic | Adiposity | SDMV               | Sagittal diameter adj for age, age square, sex, meno status, smoking       | <a href="http://www.ncbi.nlm.nih.gov/projects/gap/cgi-bin/analysis.cgi?id=pha000405">http://www.ncbi.nlm.nih.gov/projects/gap/cgi-bin/analysis.cgi?id=pha000405</a> |
| Metabolic | Adiposity | VATAS              | VAT adj for age, age squared, sex                                          | <a href="http://www.ncbi.nlm.nih.gov/projects/gap/cgi-bin/analysis.cgi?id=pha000407">http://www.ncbi.nlm.nih.gov/projects/gap/cgi-bin/analysis.cgi?id=pha000407</a> |
| Metabolic | Adiposity | VATMV              | VAT adj for age, age squared, sex, meno status, smoking                    | <a href="http://www.ncbi.nlm.nih.gov/projects/gap/cgi-bin/analysis.cgi?id=pha000409">http://www.ncbi.nlm.nih.gov/projects/gap/cgi-bin/analysis.cgi?id=pha000409</a> |
| Metabolic | Adiposity | WCAS               | Waist by CT adj for age, age squared, sex                                  | <a href="http://www.ncbi.nlm.nih.gov/projects/gap/cgi-bin/analysis.cgi?id=pha000411">http://www.ncbi.nlm.nih.gov/projects/gap/cgi-bin/analysis.cgi?id=pha000411</a> |
| Metabolic | Adiposity | WCMV               | Waist by CT adj for age, age squared, sex, meno status, smoking            | <a href="http://www.ncbi.nlm.nih.gov/projects/gap/cgi-bin/analysis.cgi?id=pha000413">http://www.ncbi.nlm.nih.gov/projects/gap/cgi-bin/analysis.cgi?id=pha000413</a> |
| Metabolic | Glycemic  | DiabSurv1sexage    | Diabetes incidence to ex7, age-sex adjusted in FBAT, Cox model for GEE     | <a href="http://www.ncbi.nlm.nih.gov/projects/gap/cgi-bin/analysis.cgi?id=pha000415">http://www.ncbi.nlm.nih.gov/projects/gap/cgi-bin/analysis.cgi?id=pha000415</a> |
| Metabolic | Glycemic  | DiabSurv2sexagebmi | Diabetes incidence to ex7, age-sex-bmi adjusted in FBAT, Cox model for GEE | <a href="http://www.ncbi.nlm.nih.gov/projects/gap/cgi-bin/analysis.cgi?id=pha000417">http://www.ncbi.nlm.nih.gov/projects/gap/cgi-bin/analysis.cgi?id=pha000417</a> |
| Metabolic | Glycemic  | res1ladipoq7o      | Age-sex adjusted Adiponectin ex7 offspring                                 | <a href="http://www.ncbi.nlm.nih.gov/projects/gap/cgi-bin/analysis.cgi?id=pha000419">http://www.ncbi.nlm.nih.gov/projects/gap/cgi-bin/analysis.cgi?id=pha000419</a> |
| Metabolic | Glycemic  | res1lfglu5o        | Age-sex adjusted Fasting Plasma Glucose ex5 offspring                      | <a href="http://www.ncbi.nlm.nih.gov/projects/gap/cgi-bin/analysis.cgi?id=pha000421">http://www.ncbi.nlm.nih.gov/projects/gap/cgi-bin/analysis.cgi?id=pha000421</a> |
| Metabolic | Glycemic  | res1lfglu7o        | Age-sex adjusted Fasting Plasma Glucose ex7 offspring                      | <a href="http://www.ncbi.nlm.nih.gov/projects/gap/cgi-bin/analysis.cgi?id=pha000423">http://www.ncbi.nlm.nih.gov/projects/gap/cgi-bin/analysis.cgi?id=pha000423</a> |
| Metabolic | Glycemic  | res1lfn5o          | Age-sex adjusted Fasting Insulin ex5 offspring                             | <a href="http://www.ncbi.nlm.nih.gov/projects/gap/cgi-bin/analysis.cgi?id=pha000425">http://www.ncbi.nlm.nih.gov/projects/gap/cgi-bin/analysis.cgi?id=pha000425</a> |
| Metabolic | Glycemic  | res1lfn7o          | Age-sex adjusted Fasting Insulin ex7 offspring                             | <a href="http://www.ncbi.nlm.nih.gov/projects/gap/cgi-bin/analysis.cgi?id=pha000427">http://www.ncbi.nlm.nih.gov/projects/gap/cgi-bin/analysis.cgi?id=pha000427</a> |
| Metabolic | Glycemic  | res1lqutt5o        | Age-sex adjusted Insulin Sensitivity ex5 offspring                         | <a href="http://www.ncbi.nlm.nih.gov/projects/gap/cgi-bin/analysis.cgi?id=pha000429">http://www.ncbi.nlm.nih.gov/projects/gap/cgi-bin/analysis.cgi?id=pha000429</a> |
| Metabolic | Glycemic  | res1lhba1c5o       | Age-sex adjusted Fasting HbA1c ex5 offspring                               | <a href="http://www.ncbi.nlm.nih.gov/projects/gap/cgi-bin/analysis.cgi?id=pha000431">http://www.ncbi.nlm.nih.gov/projects/gap/cgi-bin/analysis.cgi?id=pha000431</a> |
| Metabolic | Glycemic  | res1lhba1c7o       | Age-sex adjusted HbA1c ex7 offspring                                       | <a href="http://www.ncbi.nlm.nih.gov/projects/gap/cgi-bin/analysis.cgi?id=pha000433">http://www.ncbi.nlm.nih.gov/projects/gap/cgi-bin/analysis.cgi?id=pha000433</a> |
| Metabolic | Glycemic  | res1lhir5o         | Age-sex adjusted HOMA-IR ex5 offspring                                     | <a href="http://www.ncbi.nlm.nih.gov/projects/gap/cgi-bin/analysis.cgi?id=pha000435">http://www.ncbi.nlm.nih.gov/projects/gap/cgi-bin/analysis.cgi?id=pha000435</a> |
| Metabolic | Glycemic  | res1lhir7o         | Age-sex adjusted HOMA-IR ex7 offspring                                     | <a href="http://www.ncbi.nlm.nih.gov/projects/gap/cgi-bin/analysis.cgi?id=pha000437">http://www.ncbi.nlm.nih.gov/projects/gap/cgi-bin/analysis.cgi?id=pha000437</a> |
| Metabolic | Glycemic  | res1lmfglu17o      | Age-sex adjusted Mean Plasma Glucose ex1-7 offspring                       | <a href="http://www.ncbi.nlm.nih.gov/projects/gap/cgi-bin/analysis.cgi?id=pha000439">http://www.ncbi.nlm.nih.gov/projects/gap/cgi-bin/analysis.cgi?id=pha000439</a> |
| Metabolic | Glycemic  | res1lretn7o        | Age-sex adjusted Resistin ex7 offspring                                    | <a href="http://www.ncbi.nlm.nih.gov/projects/gap/cgi-bin/analysis.cgi?id=pha000441">http://www.ncbi.nlm.nih.gov/projects/gap/cgi-bin/analysis.cgi?id=pha000441</a> |
| Metabolic | Glycemic  | res2ladipoq7o      | Multivariable adjusted Adiponectin ex7 offspring                           | <a href="http://www.ncbi.nlm.nih.gov/projects/gap/cgi-bin/analysis.cgi?id=pha000443">http://www.ncbi.nlm.nih.gov/projects/gap/cgi-bin/analysis.cgi?id=pha000443</a> |

Online Table 2: Phenotypes Evaluated for Association using Family-based Analysis (FBAT)

| Group     | Category | Trait Label  | Name                                                         | FBAT Link                                                                                                                                                           |
|-----------|----------|--------------|--------------------------------------------------------------|---------------------------------------------------------------------------------------------------------------------------------------------------------------------|
| Metabolic | Glycemic | res2lfglu5o  | Multivariable adjusted Fasting Plasma Glucose ex5 offspring  | <a href="http://www.ncbi.nlm.nih.gov/projects/gap/cgi-bin/analysis.cgi?id=pha000445">http://www.ncbi.nlm.nih.gov/projects/gap/cgi-bin/analysis.cgi?id=pha000445</a> |
| Metabolic | Glycemic | res2lfglu7o  | Multivariable adjusted Fasting Plasma Glucose ex7 offspring  | <a href="http://www.ncbi.nlm.nih.gov/projects/gap/cgi-bin/analysis.cgi?id=pha000447">http://www.ncbi.nlm.nih.gov/projects/gap/cgi-bin/analysis.cgi?id=pha000447</a> |
| Metabolic | Glycemic | res2lflns5o  | Multivariable adjusted Fasting Insulin ex5 offspring         | <a href="http://www.ncbi.nlm.nih.gov/projects/gap/cgi-bin/analysis.cgi?id=pha000449">http://www.ncbi.nlm.nih.gov/projects/gap/cgi-bin/analysis.cgi?id=pha000449</a> |
| Metabolic | Glycemic | res2lflns7o  | Multivariable adjusted Fasting Insulin ex7 offspring         | <a href="http://www.ncbi.nlm.nih.gov/projects/gap/cgi-bin/analysis.cgi?id=pha000451">http://www.ncbi.nlm.nih.gov/projects/gap/cgi-bin/analysis.cgi?id=pha000451</a> |
| Metabolic | Glycemic | res2lgtt5o   | Multivariable adjusted Insulin Sensitivity ex5 offspring     | <a href="http://www.ncbi.nlm.nih.gov/projects/gap/cgi-bin/analysis.cgi?id=pha000453">http://www.ncbi.nlm.nih.gov/projects/gap/cgi-bin/analysis.cgi?id=pha000453</a> |
| Metabolic | Glycemic | res2lhba1c5o | Multivariable adjusted Fasting HbA1c ex5 offspring           | <a href="http://www.ncbi.nlm.nih.gov/projects/gap/cgi-bin/analysis.cgi?id=pha000455">http://www.ncbi.nlm.nih.gov/projects/gap/cgi-bin/analysis.cgi?id=pha000455</a> |
| Metabolic | Glycemic | res2lhba1c7o | Multivariable adjusted HbA1c ex7 offspring                   | <a href="http://www.ncbi.nlm.nih.gov/projects/gap/cgi-bin/analysis.cgi?id=pha000457">http://www.ncbi.nlm.nih.gov/projects/gap/cgi-bin/analysis.cgi?id=pha000457</a> |
| Metabolic | Glycemic | res2lhir5o   | Multivariable adjusted HOMA-IR ex5 offspring                 | <a href="http://www.ncbi.nlm.nih.gov/projects/gap/cgi-bin/analysis.cgi?id=pha000459">http://www.ncbi.nlm.nih.gov/projects/gap/cgi-bin/analysis.cgi?id=pha000459</a> |
| Metabolic | Glycemic | res2lhir7o   | Multivariable adjusted HOMA-IR ex7 offspring                 | <a href="http://www.ncbi.nlm.nih.gov/projects/gap/cgi-bin/analysis.cgi?id=pha000461">http://www.ncbi.nlm.nih.gov/projects/gap/cgi-bin/analysis.cgi?id=pha000461</a> |
| Metabolic | Glycemic | res2lmglu17o | Multivariable adjusted Mean Plasma Glucose exam1-7 offspring | <a href="http://www.ncbi.nlm.nih.gov/projects/gap/cgi-bin/analysis.cgi?id=pha000463">http://www.ncbi.nlm.nih.gov/projects/gap/cgi-bin/analysis.cgi?id=pha000463</a> |
| Metabolic | Glycemic | res2lretn7o  | Multivariable adjusted Resistin ex7 offspring                | <a href="http://www.ncbi.nlm.nih.gov/projects/gap/cgi-bin/analysis.cgi?id=pha000465">http://www.ncbi.nlm.nih.gov/projects/gap/cgi-bin/analysis.cgi?id=pha000465</a> |
| Metabolic | Lipids   | ApoA14a      | Multivariable adj Plasma ApoA1 Level Offsp ex4               | <a href="http://www.ncbi.nlm.nih.gov/projects/gap/cgi-bin/analysis.cgi?id=pha000467">http://www.ncbi.nlm.nih.gov/projects/gap/cgi-bin/analysis.cgi?id=pha000467</a> |
| Metabolic | Lipids   | ApoA14b      | Age-sex adj Plasma ApoA1 Level Offsp ex4                     | <a href="http://www.ncbi.nlm.nih.gov/projects/gap/cgi-bin/analysis.cgi?id=pha000469">http://www.ncbi.nlm.nih.gov/projects/gap/cgi-bin/analysis.cgi?id=pha000469</a> |
| Metabolic | Lipids   | ApoB4a       | Multivariable adj Plasma ApoB Level Offsp ex4                | <a href="http://www.ncbi.nlm.nih.gov/projects/gap/cgi-bin/analysis.cgi?id=pha000471">http://www.ncbi.nlm.nih.gov/projects/gap/cgi-bin/analysis.cgi?id=pha000471</a> |
| Metabolic | Lipids   | ApoB4b       | Age-sex adj Plasma ApoB Level Offsp ex4                      | <a href="http://www.ncbi.nlm.nih.gov/projects/gap/cgi-bin/analysis.cgi?id=pha000473">http://www.ncbi.nlm.nih.gov/projects/gap/cgi-bin/analysis.cgi?id=pha000473</a> |
| Metabolic | Lipids   | ApoC3a       | Multivariable adj Plasma ApoCIII Level Offsp ex5             | <a href="http://www.ncbi.nlm.nih.gov/projects/gap/cgi-bin/analysis.cgi?id=pha000475">http://www.ncbi.nlm.nih.gov/projects/gap/cgi-bin/analysis.cgi?id=pha000475</a> |
| Metabolic | Lipids   | ApoC3b       | Age-sex adj Plasma ApoCIII Level Offsp ex5                   | <a href="http://www.ncbi.nlm.nih.gov/projects/gap/cgi-bin/analysis.cgi?id=pha000477">http://www.ncbi.nlm.nih.gov/projects/gap/cgi-bin/analysis.cgi?id=pha000477</a> |
| Metabolic | Lipids   | chol1a       | Multivariable adj Chol Offsp ex1                             | <a href="http://www.ncbi.nlm.nih.gov/projects/gap/cgi-bin/analysis.cgi?id=pha000479">http://www.ncbi.nlm.nih.gov/projects/gap/cgi-bin/analysis.cgi?id=pha000479</a> |
| Metabolic | Lipids   | chol1b       | Age-sex adj Chol Offsp ex1                                   | <a href="http://www.ncbi.nlm.nih.gov/projects/gap/cgi-bin/analysis.cgi?id=pha000481">http://www.ncbi.nlm.nih.gov/projects/gap/cgi-bin/analysis.cgi?id=pha000481</a> |
| Metabolic | Lipids   | chol2b       | Age-sex adj Chol Offsp ex2                                   | <a href="http://www.ncbi.nlm.nih.gov/projects/gap/cgi-bin/analysis.cgi?id=pha000483">http://www.ncbi.nlm.nih.gov/projects/gap/cgi-bin/analysis.cgi?id=pha000483</a> |
| Metabolic | Lipids   | chol3b       | Age-sex adj Chol Offsp ex3                                   | <a href="http://www.ncbi.nlm.nih.gov/projects/gap/cgi-bin/analysis.cgi?id=pha000485">http://www.ncbi.nlm.nih.gov/projects/gap/cgi-bin/analysis.cgi?id=pha000485</a> |
| Metabolic | Lipids   | chol4b       | Age-sex adj Chol Offsp ex4                                   | <a href="http://www.ncbi.nlm.nih.gov/projects/gap/cgi-bin/analysis.cgi?id=pha000487">http://www.ncbi.nlm.nih.gov/projects/gap/cgi-bin/analysis.cgi?id=pha000487</a> |
| Metabolic | Lipids   | chol5b       | Age-sex adj Chol Offsp ex5                                   | <a href="http://www.ncbi.nlm.nih.gov/projects/gap/cgi-bin/analysis.cgi?id=pha000489">http://www.ncbi.nlm.nih.gov/projects/gap/cgi-bin/analysis.cgi?id=pha000489</a> |
| Metabolic | Lipids   | chol6b       | Age-sex adj Chol Offsp ex6                                   | <a href="http://www.ncbi.nlm.nih.gov/projects/gap/cgi-bin/analysis.cgi?id=pha000491">http://www.ncbi.nlm.nih.gov/projects/gap/cgi-bin/analysis.cgi?id=pha000491</a> |
| Metabolic | Lipids   | chol7b       | Age-sex adj Chol Offsp ex7                                   | <a href="http://www.ncbi.nlm.nih.gov/projects/gap/cgi-bin/analysis.cgi?id=pha000493">http://www.ncbi.nlm.nih.gov/projects/gap/cgi-bin/analysis.cgi?id=pha000493</a> |
| Metabolic | Lipids   | cholhdl1a    | Multivariable adj Chol-HDL Ratio Offsp ex1                   | <a href="http://www.ncbi.nlm.nih.gov/projects/gap/cgi-bin/analysis.cgi?id=pha000495">http://www.ncbi.nlm.nih.gov/projects/gap/cgi-bin/analysis.cgi?id=pha000495</a> |
| Metabolic | Lipids   | cholhdl1b    | Age-sex adj Chol-HDL Ratio Offsp ex1                         | <a href="http://www.ncbi.nlm.nih.gov/projects/gap/cgi-bin/analysis.cgi?id=pha000497">http://www.ncbi.nlm.nih.gov/projects/gap/cgi-bin/analysis.cgi?id=pha000497</a> |
| Metabolic | Lipids   | cholhdl2b    | Age-sex adj Chol-HDL Ratio Offsp ex2                         | <a href="http://www.ncbi.nlm.nih.gov/projects/gap/cgi-bin/analysis.cgi?id=pha000499">http://www.ncbi.nlm.nih.gov/projects/gap/cgi-bin/analysis.cgi?id=pha000499</a> |
| Metabolic | Lipids   | cholhdl3b    | Age-sex adj Chol-HDL Ratio Offsp ex3                         | <a href="http://www.ncbi.nlm.nih.gov/projects/gap/cgi-bin/analysis.cgi?id=pha000501">http://www.ncbi.nlm.nih.gov/projects/gap/cgi-bin/analysis.cgi?id=pha000501</a> |
| Metabolic | Lipids   | cholhdl4b    | Age-sex adj Chol-HDL Ratio Offsp ex4                         | <a href="http://www.ncbi.nlm.nih.gov/projects/gap/cgi-bin/analysis.cgi?id=pha000503">http://www.ncbi.nlm.nih.gov/projects/gap/cgi-bin/analysis.cgi?id=pha000503</a> |
| Metabolic | Lipids   | cholhdl5b    | Age-sex adj Chol-HDL Ratio Offsp ex5                         | <a href="http://www.ncbi.nlm.nih.gov/projects/gap/cgi-bin/analysis.cgi?id=pha000505">http://www.ncbi.nlm.nih.gov/projects/gap/cgi-bin/analysis.cgi?id=pha000505</a> |
| Metabolic | Lipids   | cholhdl6b    | Age-sex adj Chol-HDL Ratio Offsp ex6                         | <a href="http://www.ncbi.nlm.nih.gov/projects/gap/cgi-bin/analysis.cgi?id=pha000507">http://www.ncbi.nlm.nih.gov/projects/gap/cgi-bin/analysis.cgi?id=pha000507</a> |
| Metabolic | Lipids   | cholhdl7b    | Age-sex adj Chol-HDL Ratio Offsp ex7                         | <a href="http://www.ncbi.nlm.nih.gov/projects/gap/cgi-bin/analysis.cgi?id=pha000509">http://www.ncbi.nlm.nih.gov/projects/gap/cgi-bin/analysis.cgi?id=pha000509</a> |
| Metabolic | Lipids   | hdl1a        | Multivariable adj HDL Offsp ex1                              | <a href="http://www.ncbi.nlm.nih.gov/projects/gap/cgi-bin/analysis.cgi?id=pha000511">http://www.ncbi.nlm.nih.gov/projects/gap/cgi-bin/analysis.cgi?id=pha000511</a> |
| Metabolic | Lipids   | hdl1b        | Age-sex adj HDL Offsp ex1                                    | <a href="http://www.ncbi.nlm.nih.gov/projects/gap/cgi-bin/analysis.cgi?id=pha000513">http://www.ncbi.nlm.nih.gov/projects/gap/cgi-bin/analysis.cgi?id=pha000513</a> |
| Metabolic | Lipids   | hdl24a       | Multivariable adj HDL2 Offsp ex4                             | <a href="http://www.ncbi.nlm.nih.gov/projects/gap/cgi-bin/analysis.cgi?id=pha000515">http://www.ncbi.nlm.nih.gov/projects/gap/cgi-bin/analysis.cgi?id=pha000515</a> |
| Metabolic | Lipids   | hdl24b       | Age-sex adj HDL2 Offsp ex4                                   | <a href="http://www.ncbi.nlm.nih.gov/projects/gap/cgi-bin/analysis.cgi?id=pha000517">http://www.ncbi.nlm.nih.gov/projects/gap/cgi-bin/analysis.cgi?id=pha000517</a> |
| Metabolic | Lipids   | hdl25a       | Multivariable adj HDL2 Offsp ex5                             | <a href="http://www.ncbi.nlm.nih.gov/projects/gap/cgi-bin/analysis.cgi?id=pha000519">http://www.ncbi.nlm.nih.gov/projects/gap/cgi-bin/analysis.cgi?id=pha000519</a> |
| Metabolic | Lipids   | hdl25b       | Age-sex adj HDL2 Offsp ex5                                   | <a href="http://www.ncbi.nlm.nih.gov/projects/gap/cgi-bin/analysis.cgi?id=pha000521">http://www.ncbi.nlm.nih.gov/projects/gap/cgi-bin/analysis.cgi?id=pha000521</a> |
| Metabolic | Lipids   | hdl2b        | Age-sex adj HDL Offsp ex2                                    | <a href="http://www.ncbi.nlm.nih.gov/projects/gap/cgi-bin/analysis.cgi?id=pha000523">http://www.ncbi.nlm.nih.gov/projects/gap/cgi-bin/analysis.cgi?id=pha000523</a> |
| Metabolic | Lipids   | hdl34a       | Multivariable adj HDL3 Offsp ex4                             | <a href="http://www.ncbi.nlm.nih.gov/projects/gap/cgi-bin/analysis.cgi?id=pha000525">http://www.ncbi.nlm.nih.gov/projects/gap/cgi-bin/analysis.cgi?id=pha000525</a> |
| Metabolic | Lipids   | hdl34b       | Age-sex adj HDL3 Offsp ex4                                   | <a href="http://www.ncbi.nlm.nih.gov/projects/gap/cgi-bin/analysis.cgi?id=pha000527">http://www.ncbi.nlm.nih.gov/projects/gap/cgi-bin/analysis.cgi?id=pha000527</a> |
| Metabolic | Lipids   | hdl35a       | Multivariable adj HDL3 Offsp ex5                             | <a href="http://www.ncbi.nlm.nih.gov/projects/gap/cgi-bin/analysis.cgi?id=pha000529">http://www.ncbi.nlm.nih.gov/projects/gap/cgi-bin/analysis.cgi?id=pha000529</a> |
| Metabolic | Lipids   | hdl35b       | Age-sex adj HDL3 Offsp ex5                                   | <a href="http://www.ncbi.nlm.nih.gov/projects/gap/cgi-bin/analysis.cgi?id=pha000531">http://www.ncbi.nlm.nih.gov/projects/gap/cgi-bin/analysis.cgi?id=pha000531</a> |
| Metabolic | Lipids   | hdl3b        | Age-sex adj HDL Offsp ex3                                    | <a href="http://www.ncbi.nlm.nih.gov/projects/gap/cgi-bin/analysis.cgi?id=pha000533">http://www.ncbi.nlm.nih.gov/projects/gap/cgi-bin/analysis.cgi?id=pha000533</a> |
| Metabolic | Lipids   | hdl4b        | Age-sex adj HDL Offsp ex4                                    | <a href="http://www.ncbi.nlm.nih.gov/projects/gap/cgi-bin/analysis.cgi?id=pha000535">http://www.ncbi.nlm.nih.gov/projects/gap/cgi-bin/analysis.cgi?id=pha000535</a> |
| Metabolic | Lipids   | hdl5b        | Age-sex adj HDL Offsp ex5                                    | <a href="http://www.ncbi.nlm.nih.gov/projects/gap/cgi-bin/analysis.cgi?id=pha000537">http://www.ncbi.nlm.nih.gov/projects/gap/cgi-bin/analysis.cgi?id=pha000537</a> |
| Metabolic | Lipids   | hdl6b        | Age-sex adj HDL Offsp ex6                                    | <a href="http://www.ncbi.nlm.nih.gov/projects/gap/cgi-bin/analysis.cgi?id=pha000539">http://www.ncbi.nlm.nih.gov/projects/gap/cgi-bin/analysis.cgi?id=pha000539</a> |
| Metabolic | Lipids   | hdl7b        | Age-sex adj HDL Offsp ex7                                    | <a href="http://www.ncbi.nlm.nih.gov/projects/gap/cgi-bin/analysis.cgi?id=pha000541">http://www.ncbi.nlm.nih.gov/projects/gap/cgi-bin/analysis.cgi?id=pha000541</a> |
| Metabolic | Lipids   | HDLNMRint4a  | Multivariable adj NMR HDL Int Offsp ex4 or TG > 400          | <a href="http://www.ncbi.nlm.nih.gov/projects/gap/cgi-bin/analysis.cgi?id=pha000543">http://www.ncbi.nlm.nih.gov/projects/gap/cgi-bin/analysis.cgi?id=pha000543</a> |
| Metabolic | Lipids   | HDLNMRint4b  | Age-sex adj NMR HDL Int Offsp ex4 or TG > 400                | <a href="http://www.ncbi.nlm.nih.gov/projects/gap/cgi-bin/analysis.cgi?id=pha000545">http://www.ncbi.nlm.nih.gov/projects/gap/cgi-bin/analysis.cgi?id=pha000545</a> |
| Metabolic | Lipids   | HDLNMRlg4a   | Multivariable adj NMR HDL Lg Offsp ex4 or TG > 400           | <a href="http://www.ncbi.nlm.nih.gov/projects/gap/cgi-bin/analysis.cgi?id=pha000547">http://www.ncbi.nlm.nih.gov/projects/gap/cgi-bin/analysis.cgi?id=pha000547</a> |
| Metabolic | Lipids   | HDLNMRlg4b   | Age-sex adj NMR HDL Lg Offsp ex4 or TG > 400                 | <a href="http://www.ncbi.nlm.nih.gov/projects/gap/cgi-bin/analysis.cgi?id=pha000549">http://www.ncbi.nlm.nih.gov/projects/gap/cgi-bin/analysis.cgi?id=pha000549</a> |
| Metabolic | Lipids   | HDLNMRsm4a   | Multivariable adj NMR HDL Sm Offsp ex4 or TG > 400           | <a href="http://www.ncbi.nlm.nih.gov/projects/gap/cgi-bin/analysis.cgi?id=pha000551">http://www.ncbi.nlm.nih.gov/projects/gap/cgi-bin/analysis.cgi?id=pha000551</a> |
| Metabolic | Lipids   | HDLNMRsm4b   | Age-sex adj NMR HDL Sm Offsp ex4 or TG > 400                 | <a href="http://www.ncbi.nlm.nih.gov/projects/gap/cgi-bin/analysis.cgi?id=pha000553">http://www.ncbi.nlm.nih.gov/projects/gap/cgi-bin/analysis.cgi?id=pha000553</a> |
| Metabolic | Lipids   | HDLNMRsz4a   | Multivariable adj NMR HDL Size Offsp ex4 or TG > 400         | <a href="http://www.ncbi.nlm.nih.gov/projects/gap/cgi-bin/analysis.cgi?id=pha000555">http://www.ncbi.nlm.nih.gov/projects/gap/cgi-bin/analysis.cgi?id=pha000555</a> |

Online Table 2: Phenotypes Evaluated for Association using Family-based Analysis (FBAT)

| Group     | Category | Trait Label  | Name                                                 | FBAT Link                                                                                                                                                           |
|-----------|----------|--------------|------------------------------------------------------|---------------------------------------------------------------------------------------------------------------------------------------------------------------------|
| Metabolic | Lipids   | IDLNMRsz4b   | Age-sex adj NMR HDL Size Offsp ex4 or TG > 400       | <a href="http://www.ncbi.nlm.nih.gov/projects/gap/cgi-bin/analysis.cgi?id=pha000557">http://www.ncbi.nlm.nih.gov/projects/gap/cgi-bin/analysis.cgi?id=pha000557</a> |
| Metabolic | Lipids   | IDLNMR4a     | Multivariable adj NMR IDL Offsp ex4 or TG > 400      | <a href="http://www.ncbi.nlm.nih.gov/projects/gap/cgi-bin/analysis.cgi?id=pha000559">http://www.ncbi.nlm.nih.gov/projects/gap/cgi-bin/analysis.cgi?id=pha000559</a> |
| Metabolic | Lipids   | IDLNMR4b     | Age-sex adj NMR IDL Offsp ex4 or TG > 400            | <a href="http://www.ncbi.nlm.nih.gov/projects/gap/cgi-bin/analysis.cgi?id=pha000561">http://www.ncbi.nlm.nih.gov/projects/gap/cgi-bin/analysis.cgi?id=pha000561</a> |
| Metabolic | Lipids   | ldl1a        | Multivariable adj LDL Offsp ex1                      | <a href="http://www.ncbi.nlm.nih.gov/projects/gap/cgi-bin/analysis.cgi?id=pha000563">http://www.ncbi.nlm.nih.gov/projects/gap/cgi-bin/analysis.cgi?id=pha000563</a> |
| Metabolic | Lipids   | ldl1b        | Age-sex adj LDL Offsp ex1                            | <a href="http://www.ncbi.nlm.nih.gov/projects/gap/cgi-bin/analysis.cgi?id=pha000565">http://www.ncbi.nlm.nih.gov/projects/gap/cgi-bin/analysis.cgi?id=pha000565</a> |
| Metabolic | Lipids   | ldl2b        | Age-sex adj LDL Offsp ex2                            | <a href="http://www.ncbi.nlm.nih.gov/projects/gap/cgi-bin/analysis.cgi?id=pha000567">http://www.ncbi.nlm.nih.gov/projects/gap/cgi-bin/analysis.cgi?id=pha000567</a> |
| Metabolic | Lipids   | ldl3b        | Age-sex adj LDL Offsp ex3                            | <a href="http://www.ncbi.nlm.nih.gov/projects/gap/cgi-bin/analysis.cgi?id=pha000569">http://www.ncbi.nlm.nih.gov/projects/gap/cgi-bin/analysis.cgi?id=pha000569</a> |
| Metabolic | Lipids   | ldl4b        | Age-sex adj LDL Offsp ex4                            | <a href="http://www.ncbi.nlm.nih.gov/projects/gap/cgi-bin/analysis.cgi?id=pha000571">http://www.ncbi.nlm.nih.gov/projects/gap/cgi-bin/analysis.cgi?id=pha000571</a> |
| Metabolic | Lipids   | ldl5b        | Age-sex adj LDL Offsp ex5                            | <a href="http://www.ncbi.nlm.nih.gov/projects/gap/cgi-bin/analysis.cgi?id=pha000573">http://www.ncbi.nlm.nih.gov/projects/gap/cgi-bin/analysis.cgi?id=pha000573</a> |
| Metabolic | Lipids   | ldl6b        | Age-sex adj LDL Offsp ex6                            | <a href="http://www.ncbi.nlm.nih.gov/projects/gap/cgi-bin/analysis.cgi?id=pha000575">http://www.ncbi.nlm.nih.gov/projects/gap/cgi-bin/analysis.cgi?id=pha000575</a> |
| Metabolic | Lipids   | ldl7b        | Age-sex adj LDL Offsp ex7                            | <a href="http://www.ncbi.nlm.nih.gov/projects/gap/cgi-bin/analysis.cgi?id=pha000577">http://www.ncbi.nlm.nih.gov/projects/gap/cgi-bin/analysis.cgi?id=pha000577</a> |
| Metabolic | Lipids   | LDLNMRlg4a   | Multivariable adj NMR LDL Lg Offsp ex4 or TG > 400   | <a href="http://www.ncbi.nlm.nih.gov/projects/gap/cgi-bin/analysis.cgi?id=pha000579">http://www.ncbi.nlm.nih.gov/projects/gap/cgi-bin/analysis.cgi?id=pha000579</a> |
| Metabolic | Lipids   | LDLNMRlg4b   | Age-sex adj NMR LDL Lg Offsp ex4 or TG > 400         | <a href="http://www.ncbi.nlm.nih.gov/projects/gap/cgi-bin/analysis.cgi?id=pha000581">http://www.ncbi.nlm.nih.gov/projects/gap/cgi-bin/analysis.cgi?id=pha000581</a> |
| Metabolic | Lipids   | LDLNMRsm4a   | Multivariable adj NMR LDL Sm Offsp ex4 or TG > 400   | <a href="http://www.ncbi.nlm.nih.gov/projects/gap/cgi-bin/analysis.cgi?id=pha000583">http://www.ncbi.nlm.nih.gov/projects/gap/cgi-bin/analysis.cgi?id=pha000583</a> |
| Metabolic | Lipids   | LDLNMRsm4b   | Age-sex adj NMR LDL Sm Offsp ex4 or TG > 400         | <a href="http://www.ncbi.nlm.nih.gov/projects/gap/cgi-bin/analysis.cgi?id=pha000585">http://www.ncbi.nlm.nih.gov/projects/gap/cgi-bin/analysis.cgi?id=pha000585</a> |
| Metabolic | Lipids   | LDLNMRsz4a   | Multivariable adj NMR LDL Size Offsp ex4 or TG > 400 | <a href="http://www.ncbi.nlm.nih.gov/projects/gap/cgi-bin/analysis.cgi?id=pha000587">http://www.ncbi.nlm.nih.gov/projects/gap/cgi-bin/analysis.cgi?id=pha000587</a> |
| Metabolic | Lipids   | LDLNMRsz4b   | Age-sex adj NMR LDL Size Offsp ex4 or TG > 400       | <a href="http://www.ncbi.nlm.nih.gov/projects/gap/cgi-bin/analysis.cgi?id=pha000589">http://www.ncbi.nlm.nih.gov/projects/gap/cgi-bin/analysis.cgi?id=pha000589</a> |
| Metabolic | Lipids   | lpa3a        | Multivariable adj Lpa Offsp ex3                      | <a href="http://www.ncbi.nlm.nih.gov/projects/gap/cgi-bin/analysis.cgi?id=pha000591">http://www.ncbi.nlm.nih.gov/projects/gap/cgi-bin/analysis.cgi?id=pha000591</a> |
| Metabolic | Lipids   | lpa3b        | Age-sex adj Lpa Offsp ex3                            | <a href="http://www.ncbi.nlm.nih.gov/projects/gap/cgi-bin/analysis.cgi?id=pha000593">http://www.ncbi.nlm.nih.gov/projects/gap/cgi-bin/analysis.cgi?id=pha000593</a> |
| Metabolic | Lipids   | meanchola    | Multivariable adj NMR Chol Offsp ex1-7               | <a href="http://www.ncbi.nlm.nih.gov/projects/gap/cgi-bin/analysis.cgi?id=pha000595">http://www.ncbi.nlm.nih.gov/projects/gap/cgi-bin/analysis.cgi?id=pha000595</a> |
| Metabolic | Lipids   | meancholb    | Age-sex adj NMR Chol Offsp ex1-7                     | <a href="http://www.ncbi.nlm.nih.gov/projects/gap/cgi-bin/analysis.cgi?id=pha000597">http://www.ncbi.nlm.nih.gov/projects/gap/cgi-bin/analysis.cgi?id=pha000597</a> |
| Metabolic | Lipids   | meanhdla     | Multivariable adj NMR HDL Offsp ex1-7                | <a href="http://www.ncbi.nlm.nih.gov/projects/gap/cgi-bin/analysis.cgi?id=pha000599">http://www.ncbi.nlm.nih.gov/projects/gap/cgi-bin/analysis.cgi?id=pha000599</a> |
| Metabolic | Lipids   | meanhdlb     | Age-sex adj NMR HDL Offsp ex1-7                      | <a href="http://www.ncbi.nlm.nih.gov/projects/gap/cgi-bin/analysis.cgi?id=pha000601">http://www.ncbi.nlm.nih.gov/projects/gap/cgi-bin/analysis.cgi?id=pha000601</a> |
| Metabolic | Lipids   | meanldla     | Multivariable adj NMR Calc LDL Offsp ex1-7           | <a href="http://www.ncbi.nlm.nih.gov/projects/gap/cgi-bin/analysis.cgi?id=pha000603">http://www.ncbi.nlm.nih.gov/projects/gap/cgi-bin/analysis.cgi?id=pha000603</a> |
| Metabolic | Lipids   | meanldlb     | Age-sex adj NMR Calc LDL Offsp ex1-7                 | <a href="http://www.ncbi.nlm.nih.gov/projects/gap/cgi-bin/analysis.cgi?id=pha000605">http://www.ncbi.nlm.nih.gov/projects/gap/cgi-bin/analysis.cgi?id=pha000605</a> |
| Metabolic | Lipids   | meantga      | Multivariable adj NMR (TG) Offsp ex1-7               | <a href="http://www.ncbi.nlm.nih.gov/projects/gap/cgi-bin/analysis.cgi?id=pha000607">http://www.ncbi.nlm.nih.gov/projects/gap/cgi-bin/analysis.cgi?id=pha000607</a> |
| Metabolic | Lipids   | meantgb      | Age-sex adj NMR (TG) Offsp ex1-7                     | <a href="http://www.ncbi.nlm.nih.gov/projects/gap/cgi-bin/analysis.cgi?id=pha000609">http://www.ncbi.nlm.nih.gov/projects/gap/cgi-bin/analysis.cgi?id=pha000609</a> |
| Metabolic | Lipids   | PlasmaApoEa  | Multivariable adj Plasma ApoE Level Offsp ex5        | <a href="http://www.ncbi.nlm.nih.gov/projects/gap/cgi-bin/analysis.cgi?id=pha000611">http://www.ncbi.nlm.nih.gov/projects/gap/cgi-bin/analysis.cgi?id=pha000611</a> |
| Metabolic | Lipids   | PlasmaApoEb  | Age-sex adj Plasma ApoE Level Offsp ex5              | <a href="http://www.ncbi.nlm.nih.gov/projects/gap/cgi-bin/analysis.cgi?id=pha000613">http://www.ncbi.nlm.nih.gov/projects/gap/cgi-bin/analysis.cgi?id=pha000613</a> |
| Metabolic | Lipids   | RLPChol4a    | Multivariable adj Remnant LP Chol Offsp ex4          | <a href="http://www.ncbi.nlm.nih.gov/projects/gap/cgi-bin/analysis.cgi?id=pha000923">http://www.ncbi.nlm.nih.gov/projects/gap/cgi-bin/analysis.cgi?id=pha000923</a> |
| Metabolic | Lipids   | RLPChol4b    | Age-sex adj Remnant LP Chol Offsp ex4                | <a href="http://www.ncbi.nlm.nih.gov/projects/gap/cgi-bin/analysis.cgi?id=pha000925">http://www.ncbi.nlm.nih.gov/projects/gap/cgi-bin/analysis.cgi?id=pha000925</a> |
| Metabolic | Lipids   | RLPTG4a      | Remnant LP TG Offsp ex4                              | <a href="http://www.ncbi.nlm.nih.gov/projects/gap/cgi-bin/analysis.cgi?id=pha000617">http://www.ncbi.nlm.nih.gov/projects/gap/cgi-bin/analysis.cgi?id=pha000617</a> |
| Metabolic | Lipids   | RLPTG4b      | Remnant LP Age-sex adj TG Offsp ex4                  | <a href="http://www.ncbi.nlm.nih.gov/projects/gap/cgi-bin/analysis.cgi?id=pha000615">http://www.ncbi.nlm.nih.gov/projects/gap/cgi-bin/analysis.cgi?id=pha000615</a> |
| Metabolic | Lipids   | tg1a         | Multivariable adj TG Offsp ex1                       | <a href="http://www.ncbi.nlm.nih.gov/projects/gap/cgi-bin/analysis.cgi?id=pha000619">http://www.ncbi.nlm.nih.gov/projects/gap/cgi-bin/analysis.cgi?id=pha000619</a> |
| Metabolic | Lipids   | tg1b         | Age-sex adj TG Offsp ex1                             | <a href="http://www.ncbi.nlm.nih.gov/projects/gap/cgi-bin/analysis.cgi?id=pha000621">http://www.ncbi.nlm.nih.gov/projects/gap/cgi-bin/analysis.cgi?id=pha000621</a> |
| Metabolic | Lipids   | tg2b         | Age-sex adj TG Offsp ex2                             | <a href="http://www.ncbi.nlm.nih.gov/projects/gap/cgi-bin/analysis.cgi?id=pha000623">http://www.ncbi.nlm.nih.gov/projects/gap/cgi-bin/analysis.cgi?id=pha000623</a> |
| Metabolic | Lipids   | tg3b         | Age-sex adj TG Offsp ex3                             | <a href="http://www.ncbi.nlm.nih.gov/projects/gap/cgi-bin/analysis.cgi?id=pha000625">http://www.ncbi.nlm.nih.gov/projects/gap/cgi-bin/analysis.cgi?id=pha000625</a> |
| Metabolic | Lipids   | tg4b         | Age-sex adj TG Offsp ex4                             | <a href="http://www.ncbi.nlm.nih.gov/projects/gap/cgi-bin/analysis.cgi?id=pha000627">http://www.ncbi.nlm.nih.gov/projects/gap/cgi-bin/analysis.cgi?id=pha000627</a> |
| Metabolic | Lipids   | tg5b         | Age-sex adj TG Offsp ex5                             | <a href="http://www.ncbi.nlm.nih.gov/projects/gap/cgi-bin/analysis.cgi?id=pha000629">http://www.ncbi.nlm.nih.gov/projects/gap/cgi-bin/analysis.cgi?id=pha000629</a> |
| Metabolic | Lipids   | tg6b         | Age-sex adj TG Offsp ex6                             | <a href="http://www.ncbi.nlm.nih.gov/projects/gap/cgi-bin/analysis.cgi?id=pha000631">http://www.ncbi.nlm.nih.gov/projects/gap/cgi-bin/analysis.cgi?id=pha000631</a> |
| Metabolic | Lipids   | tg7b         | Age-sex adj TG Offsp ex7                             | <a href="http://www.ncbi.nlm.nih.gov/projects/gap/cgi-bin/analysis.cgi?id=pha000633">http://www.ncbi.nlm.nih.gov/projects/gap/cgi-bin/analysis.cgi?id=pha000633</a> |
| Metabolic | Lipids   | tghdl1a      | Multivariable adj TG-HDL Ratio Offsp ex1             | <a href="http://www.ncbi.nlm.nih.gov/projects/gap/cgi-bin/analysis.cgi?id=pha000667">http://www.ncbi.nlm.nih.gov/projects/gap/cgi-bin/analysis.cgi?id=pha000667</a> |
| Metabolic | Lipids   | tghdl1b      | Age-sex adj TG-HDL Ratio Offsp ex1                   | <a href="http://www.ncbi.nlm.nih.gov/projects/gap/cgi-bin/analysis.cgi?id=pha000913">http://www.ncbi.nlm.nih.gov/projects/gap/cgi-bin/analysis.cgi?id=pha000913</a> |
| Metabolic | Lipids   | tghdl2b      | Age-sex adj TG-HDL Ratio Offsp ex2                   | <a href="http://www.ncbi.nlm.nih.gov/projects/gap/cgi-bin/analysis.cgi?id=pha000669">http://www.ncbi.nlm.nih.gov/projects/gap/cgi-bin/analysis.cgi?id=pha000669</a> |
| Metabolic | Lipids   | tghdl3b      | Age-sex adj TG-HDL Ratio Offsp ex3                   | <a href="http://www.ncbi.nlm.nih.gov/projects/gap/cgi-bin/analysis.cgi?id=pha000671">http://www.ncbi.nlm.nih.gov/projects/gap/cgi-bin/analysis.cgi?id=pha000671</a> |
| Metabolic | Lipids   | tghdl4b      | Age-sex adj TG-HDL Ratio Offsp ex4                   | <a href="http://www.ncbi.nlm.nih.gov/projects/gap/cgi-bin/analysis.cgi?id=pha000673">http://www.ncbi.nlm.nih.gov/projects/gap/cgi-bin/analysis.cgi?id=pha000673</a> |
| Metabolic | Lipids   | tghdl5b      | Age-sex adj TG-HDL Ratio Offsp ex5                   | <a href="http://www.ncbi.nlm.nih.gov/projects/gap/cgi-bin/analysis.cgi?id=pha000675">http://www.ncbi.nlm.nih.gov/projects/gap/cgi-bin/analysis.cgi?id=pha000675</a> |
| Metabolic | Lipids   | tghdl6b      | Age-sex adj TG-HDL Ratio Offsp ex6                   | <a href="http://www.ncbi.nlm.nih.gov/projects/gap/cgi-bin/analysis.cgi?id=pha000677">http://www.ncbi.nlm.nih.gov/projects/gap/cgi-bin/analysis.cgi?id=pha000677</a> |
| Metabolic | Lipids   | tghdl7b      | Age-sex adj TG-HDL Ratio Offsp ex7                   | <a href="http://www.ncbi.nlm.nih.gov/projects/gap/cgi-bin/analysis.cgi?id=pha000679">http://www.ncbi.nlm.nih.gov/projects/gap/cgi-bin/analysis.cgi?id=pha000679</a> |
| Metabolic | Lipids   | VLDLNMRint4a | Multivariable adj NMR VLDL Int Offsp ex4             | <a href="http://www.ncbi.nlm.nih.gov/projects/gap/cgi-bin/analysis.cgi?id=pha000865">http://www.ncbi.nlm.nih.gov/projects/gap/cgi-bin/analysis.cgi?id=pha000865</a> |
| Metabolic | Lipids   | VLDLNMRint4b | Age-sex adj NMR VLDL Int Offsp ex4                   | <a href="http://www.ncbi.nlm.nih.gov/projects/gap/cgi-bin/analysis.cgi?id=pha000867">http://www.ncbi.nlm.nih.gov/projects/gap/cgi-bin/analysis.cgi?id=pha000867</a> |
| Metabolic | Lipids   | VLDLNMRlg4a  | Multivariable adj NMR VLDL Lg Offsp ex4              | <a href="http://www.ncbi.nlm.nih.gov/projects/gap/cgi-bin/analysis.cgi?id=pha000877">http://www.ncbi.nlm.nih.gov/projects/gap/cgi-bin/analysis.cgi?id=pha000877</a> |
| Metabolic | Lipids   | VLDLNMRlg4b  | Age-sex adj NMR VLDL Lg Offsp ex4                    | <a href="http://www.ncbi.nlm.nih.gov/projects/gap/cgi-bin/analysis.cgi?id=pha000879">http://www.ncbi.nlm.nih.gov/projects/gap/cgi-bin/analysis.cgi?id=pha000879</a> |
| Metabolic | Lipids   | VLDLNMRsm4a  | Multivariable adj NMR VLDL Sm Offsp ex4              | <a href="http://www.ncbi.nlm.nih.gov/projects/gap/cgi-bin/analysis.cgi?id=pha000901">http://www.ncbi.nlm.nih.gov/projects/gap/cgi-bin/analysis.cgi?id=pha000901</a> |
| Metabolic | Lipids   | VLDLNMRsm4b  | Age-sex adj NMR VLDL Sm Offsp ex4                    | <a href="http://www.ncbi.nlm.nih.gov/projects/gap/cgi-bin/analysis.cgi?id=pha000903">http://www.ncbi.nlm.nih.gov/projects/gap/cgi-bin/analysis.cgi?id=pha000903</a> |
| Metabolic | Lipids   | VLDLNMRsz4a  | Multivariable adj NMR VLDL Size Offsp ex4            | <a href="http://www.ncbi.nlm.nih.gov/projects/gap/cgi-bin/analysis.cgi?id=pha000889">http://www.ncbi.nlm.nih.gov/projects/gap/cgi-bin/analysis.cgi?id=pha000889</a> |

Online Table 2: Phenotypes Evaluated for Association using Family-based Analysis (FBAT)

| Group     | Category  | Trait Label    | Name                                              | FBAT Link                                                                                                                                                           |
|-----------|-----------|----------------|---------------------------------------------------|---------------------------------------------------------------------------------------------------------------------------------------------------------------------|
| Metabolic | Lipids    | VLDLNMRSz4b    | Age-sex adj NMR VLDL Size Offsp ex4               | <a href="http://www.ncbi.nlm.nih.gov/projects/gap/cgi-bin/analysis.cgi?id=pha000891">http://www.ncbi.nlm.nih.gov/projects/gap/cgi-bin/analysis.cgi?id=pha000891</a> |
| Metabolic | Lipidsmen | menApoB4a      | Multivariable adj Plasma ApoB Level Offsp men ex4 | <a href="http://www.ncbi.nlm.nih.gov/projects/gap/cgi-bin/analysis.cgi?id=pha000915">http://www.ncbi.nlm.nih.gov/projects/gap/cgi-bin/analysis.cgi?id=pha000915</a> |
| Metabolic | Lipidsmen | menApoB4b      | Age-sex adj Plasma ApoB Level Offsp men ex4       | <a href="http://www.ncbi.nlm.nih.gov/projects/gap/cgi-bin/analysis.cgi?id=pha000917">http://www.ncbi.nlm.nih.gov/projects/gap/cgi-bin/analysis.cgi?id=pha000917</a> |
| Metabolic | Lipidsmen | menchol1a      | Multivariable adj Chol Offsp men ex1              | <a href="http://www.ncbi.nlm.nih.gov/projects/gap/cgi-bin/analysis.cgi?id=pha000709">http://www.ncbi.nlm.nih.gov/projects/gap/cgi-bin/analysis.cgi?id=pha000709</a> |
| Metabolic | Lipidsmen | menchol1b      | Age-sex adj Chol Offsp men ex1                    | <a href="http://www.ncbi.nlm.nih.gov/projects/gap/cgi-bin/analysis.cgi?id=pha000711">http://www.ncbi.nlm.nih.gov/projects/gap/cgi-bin/analysis.cgi?id=pha000711</a> |
| Metabolic | Lipidsmen | menchol2b      | Age-sex adj Chol Offsp men ex2                    | <a href="http://www.ncbi.nlm.nih.gov/projects/gap/cgi-bin/analysis.cgi?id=pha000713">http://www.ncbi.nlm.nih.gov/projects/gap/cgi-bin/analysis.cgi?id=pha000713</a> |
| Metabolic | Lipidsmen | menchol3b      | Age-sex adj Chol Offsp men ex3                    | <a href="http://www.ncbi.nlm.nih.gov/projects/gap/cgi-bin/analysis.cgi?id=pha000715">http://www.ncbi.nlm.nih.gov/projects/gap/cgi-bin/analysis.cgi?id=pha000715</a> |
| Metabolic | Lipidsmen | menchol4b      | Age-sex adj Chol Offsp men ex4                    | <a href="http://www.ncbi.nlm.nih.gov/projects/gap/cgi-bin/analysis.cgi?id=pha000717">http://www.ncbi.nlm.nih.gov/projects/gap/cgi-bin/analysis.cgi?id=pha000717</a> |
| Metabolic | Lipidsmen | menchol5b      | Age-sex adj Chol Offsp men ex5                    | <a href="http://www.ncbi.nlm.nih.gov/projects/gap/cgi-bin/analysis.cgi?id=pha000719">http://www.ncbi.nlm.nih.gov/projects/gap/cgi-bin/analysis.cgi?id=pha000719</a> |
| Metabolic | Lipidsmen | menchol6b      | Age-sex adj Chol Offsp men ex6                    | <a href="http://www.ncbi.nlm.nih.gov/projects/gap/cgi-bin/analysis.cgi?id=pha000721">http://www.ncbi.nlm.nih.gov/projects/gap/cgi-bin/analysis.cgi?id=pha000721</a> |
| Metabolic | Lipidsmen | menchol7b      | Age-sex adj Chol Offsp men ex7                    | <a href="http://www.ncbi.nlm.nih.gov/projects/gap/cgi-bin/analysis.cgi?id=pha000723">http://www.ncbi.nlm.nih.gov/projects/gap/cgi-bin/analysis.cgi?id=pha000723</a> |
| Metabolic | Lipidsmen | menhdl1a       | Multivariable adj HDL Offsp men ex1               | <a href="http://www.ncbi.nlm.nih.gov/projects/gap/cgi-bin/analysis.cgi?id=pha000741">http://www.ncbi.nlm.nih.gov/projects/gap/cgi-bin/analysis.cgi?id=pha000741</a> |
| Metabolic | Lipidsmen | menhdl1b       | Age-sex adj HDL Offsp men ex1                     | <a href="http://www.ncbi.nlm.nih.gov/projects/gap/cgi-bin/analysis.cgi?id=pha000743">http://www.ncbi.nlm.nih.gov/projects/gap/cgi-bin/analysis.cgi?id=pha000743</a> |
| Metabolic | Lipidsmen | menhdl2b       | Age-sex adj HDL Offsp men ex2                     | <a href="http://www.ncbi.nlm.nih.gov/projects/gap/cgi-bin/analysis.cgi?id=pha000745">http://www.ncbi.nlm.nih.gov/projects/gap/cgi-bin/analysis.cgi?id=pha000745</a> |
| Metabolic | Lipidsmen | menhdl3b       | Age-sex adj HDL Offsp men ex3                     | <a href="http://www.ncbi.nlm.nih.gov/projects/gap/cgi-bin/analysis.cgi?id=pha000747">http://www.ncbi.nlm.nih.gov/projects/gap/cgi-bin/analysis.cgi?id=pha000747</a> |
| Metabolic | Lipidsmen | menhdl4b       | Age-sex adj HDL Offsp men ex4                     | <a href="http://www.ncbi.nlm.nih.gov/projects/gap/cgi-bin/analysis.cgi?id=pha000749">http://www.ncbi.nlm.nih.gov/projects/gap/cgi-bin/analysis.cgi?id=pha000749</a> |
| Metabolic | Lipidsmen | menhdl5b       | Age-sex adj HDL Offsp men ex5                     | <a href="http://www.ncbi.nlm.nih.gov/projects/gap/cgi-bin/analysis.cgi?id=pha000751">http://www.ncbi.nlm.nih.gov/projects/gap/cgi-bin/analysis.cgi?id=pha000751</a> |
| Metabolic | Lipidsmen | menhdl6b       | Age-sex adj HDL Offsp men ex6                     | <a href="http://www.ncbi.nlm.nih.gov/projects/gap/cgi-bin/analysis.cgi?id=pha000753">http://www.ncbi.nlm.nih.gov/projects/gap/cgi-bin/analysis.cgi?id=pha000753</a> |
| Metabolic | Lipidsmen | menhdl7b       | Age-sex adj HDL Offsp men ex7                     | <a href="http://www.ncbi.nlm.nih.gov/projects/gap/cgi-bin/analysis.cgi?id=pha000755">http://www.ncbi.nlm.nih.gov/projects/gap/cgi-bin/analysis.cgi?id=pha000755</a> |
| Metabolic | Lipidsmen | menHDLNMRint4a | Multivariable adj NMR HDL Int Offsp men ex4       | <a href="http://www.ncbi.nlm.nih.gov/projects/gap/cgi-bin/analysis.cgi?id=pha000809">http://www.ncbi.nlm.nih.gov/projects/gap/cgi-bin/analysis.cgi?id=pha000809</a> |
| Metabolic | Lipidsmen | menHDLNMRint4b | Age-sex adj NMR HDL Int Offsp men ex4             | <a href="http://www.ncbi.nlm.nih.gov/projects/gap/cgi-bin/analysis.cgi?id=pha000811">http://www.ncbi.nlm.nih.gov/projects/gap/cgi-bin/analysis.cgi?id=pha000811</a> |
| Metabolic | Lipidsmen | menHDLNMRlg4a  | Multivariable adj NMR HDL Lg Offsp men ex4        | <a href="http://www.ncbi.nlm.nih.gov/projects/gap/cgi-bin/analysis.cgi?id=pha000817">http://www.ncbi.nlm.nih.gov/projects/gap/cgi-bin/analysis.cgi?id=pha000817</a> |
| Metabolic | Lipidsmen | menHDLNMRlg4b  | Age-sex adj NMR HDL Lg Offsp men ex4              | <a href="http://www.ncbi.nlm.nih.gov/projects/gap/cgi-bin/analysis.cgi?id=pha000819">http://www.ncbi.nlm.nih.gov/projects/gap/cgi-bin/analysis.cgi?id=pha000819</a> |
| Metabolic | Lipidsmen | menHDLNMRsm4a  | Multivariable adj NMR HDL Sm Offsp men ex4        | <a href="http://www.ncbi.nlm.nih.gov/projects/gap/cgi-bin/analysis.cgi?id=pha000833">http://www.ncbi.nlm.nih.gov/projects/gap/cgi-bin/analysis.cgi?id=pha000833</a> |
| Metabolic | Lipidsmen | menHDLNMRsm4b  | Age-sex adj NMR HDL Sm Offsp men ex4              | <a href="http://www.ncbi.nlm.nih.gov/projects/gap/cgi-bin/analysis.cgi?id=pha000835">http://www.ncbi.nlm.nih.gov/projects/gap/cgi-bin/analysis.cgi?id=pha000835</a> |
| Metabolic | Lipidsmen | menHDLNMRsz4a  | Multivariable adj NMR HDL Size Offsp men ex4      | <a href="http://www.ncbi.nlm.nih.gov/projects/gap/cgi-bin/analysis.cgi?id=pha000825">http://www.ncbi.nlm.nih.gov/projects/gap/cgi-bin/analysis.cgi?id=pha000825</a> |
| Metabolic | Lipidsmen | menHDLNMRsz4b  | Age-sex adj NMR HDL Size Offsp men ex4            | <a href="http://www.ncbi.nlm.nih.gov/projects/gap/cgi-bin/analysis.cgi?id=pha000827">http://www.ncbi.nlm.nih.gov/projects/gap/cgi-bin/analysis.cgi?id=pha000827</a> |
| Metabolic | Lipidsmen | menldl1a       | Multivariable adj LDL Offsp men ex1               | <a href="http://www.ncbi.nlm.nih.gov/projects/gap/cgi-bin/analysis.cgi?id=pha000681">http://www.ncbi.nlm.nih.gov/projects/gap/cgi-bin/analysis.cgi?id=pha000681</a> |
| Metabolic | Lipidsmen | menldl1b       | Age-sex adj LDL Offsp men ex1                     | <a href="http://www.ncbi.nlm.nih.gov/projects/gap/cgi-bin/analysis.cgi?id=pha000773">http://www.ncbi.nlm.nih.gov/projects/gap/cgi-bin/analysis.cgi?id=pha000773</a> |
| Metabolic | Lipidsmen | menldl2b       | Age-sex adj LDL Offsp men ex2                     | <a href="http://www.ncbi.nlm.nih.gov/projects/gap/cgi-bin/analysis.cgi?id=pha000678">http://www.ncbi.nlm.nih.gov/projects/gap/cgi-bin/analysis.cgi?id=pha000678</a> |
| Metabolic | Lipidsmen | menldl3b       | Age-sex adj LDL Offsp men ex3                     | <a href="http://www.ncbi.nlm.nih.gov/projects/gap/cgi-bin/analysis.cgi?id=pha000685">http://www.ncbi.nlm.nih.gov/projects/gap/cgi-bin/analysis.cgi?id=pha000685</a> |
| Metabolic | Lipidsmen | menldl4b       | Age-sex adj LDL Offsp men ex4                     | <a href="http://www.ncbi.nlm.nih.gov/projects/gap/cgi-bin/analysis.cgi?id=pha000687">http://www.ncbi.nlm.nih.gov/projects/gap/cgi-bin/analysis.cgi?id=pha000687</a> |
| Metabolic | Lipidsmen | menldl5b       | Age-sex adj LDL Offsp men ex5                     | <a href="http://www.ncbi.nlm.nih.gov/projects/gap/cgi-bin/analysis.cgi?id=pha000689">http://www.ncbi.nlm.nih.gov/projects/gap/cgi-bin/analysis.cgi?id=pha000689</a> |
| Metabolic | Lipidsmen | menldl6b       | Age-sex adj LDL Offsp men ex6                     | <a href="http://www.ncbi.nlm.nih.gov/projects/gap/cgi-bin/analysis.cgi?id=pha000691">http://www.ncbi.nlm.nih.gov/projects/gap/cgi-bin/analysis.cgi?id=pha000691</a> |
| Metabolic | Lipidsmen | menldl7b       | Age-sex adj LDL Offsp men ex7                     | <a href="http://www.ncbi.nlm.nih.gov/projects/gap/cgi-bin/analysis.cgi?id=pha000693">http://www.ncbi.nlm.nih.gov/projects/gap/cgi-bin/analysis.cgi?id=pha000693</a> |
| Metabolic | Lipidsmen | menLDLNMRlg4a  | Multivariable adj NMR LDL Lg Offsp men ex4        | <a href="http://www.ncbi.nlm.nih.gov/projects/gap/cgi-bin/analysis.cgi?id=pha000841">http://www.ncbi.nlm.nih.gov/projects/gap/cgi-bin/analysis.cgi?id=pha000841</a> |
| Metabolic | Lipidsmen | menLDLNMRlg4b  | Age-sex adj NMR LDL Lg Offsp men ex4              | <a href="http://www.ncbi.nlm.nih.gov/projects/gap/cgi-bin/analysis.cgi?id=pha000843">http://www.ncbi.nlm.nih.gov/projects/gap/cgi-bin/analysis.cgi?id=pha000843</a> |
| Metabolic | Lipidsmen | menLDLNMRsm4a  | Multivariable adj NMR LDL Sm Offsp men ex4        | <a href="http://www.ncbi.nlm.nih.gov/projects/gap/cgi-bin/analysis.cgi?id=pha000857">http://www.ncbi.nlm.nih.gov/projects/gap/cgi-bin/analysis.cgi?id=pha000857</a> |
| Metabolic | Lipidsmen | menLDLNMRsm4b  | Age-sex adj NMR LDL Sm Offsp men ex4              | <a href="http://www.ncbi.nlm.nih.gov/projects/gap/cgi-bin/analysis.cgi?id=pha000859">http://www.ncbi.nlm.nih.gov/projects/gap/cgi-bin/analysis.cgi?id=pha000859</a> |
| Metabolic | Lipidsmen | menLDLNMRsz4a  | Multivariable adj NMR LDL Size Offsp men ex4      | <a href="http://www.ncbi.nlm.nih.gov/projects/gap/cgi-bin/analysis.cgi?id=pha000849">http://www.ncbi.nlm.nih.gov/projects/gap/cgi-bin/analysis.cgi?id=pha000849</a> |
| Metabolic | Lipidsmen | menLDLNMRsz4b  | Age-sex adj NMR LDL Size Offsp men ex4            | <a href="http://www.ncbi.nlm.nih.gov/projects/gap/cgi-bin/analysis.cgi?id=pha000851">http://www.ncbi.nlm.nih.gov/projects/gap/cgi-bin/analysis.cgi?id=pha000851</a> |
| Metabolic | Lipidsmen | menmeanchola   | Multivariable adj Mean Chol Offsp men ex1-7       | <a href="http://www.ncbi.nlm.nih.gov/projects/gap/cgi-bin/analysis.cgi?id=pha000793">http://www.ncbi.nlm.nih.gov/projects/gap/cgi-bin/analysis.cgi?id=pha000793</a> |
| Metabolic | Lipidsmen | menmeancholb   | Age-sex adj Mean Chol Offsp men ex1-7             | <a href="http://www.ncbi.nlm.nih.gov/projects/gap/cgi-bin/analysis.cgi?id=pha000795">http://www.ncbi.nlm.nih.gov/projects/gap/cgi-bin/analysis.cgi?id=pha000795</a> |
| Metabolic | Lipidsmen | menmeanhdla    | Multivariable adj Mean HDL Offsp men ex1-7        | <a href="http://www.ncbi.nlm.nih.gov/projects/gap/cgi-bin/analysis.cgi?id=pha000801">http://www.ncbi.nlm.nih.gov/projects/gap/cgi-bin/analysis.cgi?id=pha000801</a> |
| Metabolic | Lipidsmen | menmeanhdlb    | Age-sex adj Mean HDL Offsp men ex1-7              | <a href="http://www.ncbi.nlm.nih.gov/projects/gap/cgi-bin/analysis.cgi?id=pha000803">http://www.ncbi.nlm.nih.gov/projects/gap/cgi-bin/analysis.cgi?id=pha000803</a> |
| Metabolic | Lipidsmen | menmeanldla    | Multivariable adj Mean LDL Offsp men ex1-7        | <a href="http://www.ncbi.nlm.nih.gov/projects/gap/cgi-bin/analysis.cgi?id=pha000785">http://www.ncbi.nlm.nih.gov/projects/gap/cgi-bin/analysis.cgi?id=pha000785</a> |
| Metabolic | Lipidsmen | menmeanldlb    | Age-sex adj Mean LDL Offsp men ex1-7              | <a href="http://www.ncbi.nlm.nih.gov/projects/gap/cgi-bin/analysis.cgi?id=pha000787">http://www.ncbi.nlm.nih.gov/projects/gap/cgi-bin/analysis.cgi?id=pha000787</a> |
| Metabolic | Lipidsmen | menmeantga     | Multivariable adj Mean TG Offsp men ex1-7         | <a href="http://www.ncbi.nlm.nih.gov/projects/gap/cgi-bin/analysis.cgi?id=pha000777">http://www.ncbi.nlm.nih.gov/projects/gap/cgi-bin/analysis.cgi?id=pha000777</a> |
| Metabolic | Lipidsmen | menmeantgb     | Age-sex adj Mean TG Offsp men ex1-7               | <a href="http://www.ncbi.nlm.nih.gov/projects/gap/cgi-bin/analysis.cgi?id=pha000779">http://www.ncbi.nlm.nih.gov/projects/gap/cgi-bin/analysis.cgi?id=pha000779</a> |
| Metabolic | Lipidsmen | mentg1a        | Multivariable adj TG Offsp men ex1                | <a href="http://www.ncbi.nlm.nih.gov/projects/gap/cgi-bin/analysis.cgi?id=pha000635">http://www.ncbi.nlm.nih.gov/projects/gap/cgi-bin/analysis.cgi?id=pha000635</a> |
| Metabolic | Lipidsmen | mentg1b        | Age-sex adj TG Offsp men ex1                      | <a href="http://www.ncbi.nlm.nih.gov/projects/gap/cgi-bin/analysis.cgi?id=pha000637">http://www.ncbi.nlm.nih.gov/projects/gap/cgi-bin/analysis.cgi?id=pha000637</a> |
| Metabolic | Lipidsmen | mentg2b        | Age-sex adj TG Offsp men ex2                      | <a href="http://www.ncbi.nlm.nih.gov/projects/gap/cgi-bin/analysis.cgi?id=pha000639">http://www.ncbi.nlm.nih.gov/projects/gap/cgi-bin/analysis.cgi?id=pha000639</a> |
| Metabolic | Lipidsmen | mentg3b        | Age-sex adj TG Offsp men ex3                      | <a href="http://www.ncbi.nlm.nih.gov/projects/gap/cgi-bin/analysis.cgi?id=pha000641">http://www.ncbi.nlm.nih.gov/projects/gap/cgi-bin/analysis.cgi?id=pha000641</a> |
| Metabolic | Lipidsmen | mentg4b        | Age-sex adj TG Offsp men ex4                      | <a href="http://www.ncbi.nlm.nih.gov/projects/gap/cgi-bin/analysis.cgi?id=pha000643">http://www.ncbi.nlm.nih.gov/projects/gap/cgi-bin/analysis.cgi?id=pha000643</a> |
| Metabolic | Lipidsmen | mentg5b        | Age-sex adj TG Offsp men ex5                      | <a href="http://www.ncbi.nlm.nih.gov/projects/gap/cgi-bin/analysis.cgi?id=pha000645">http://www.ncbi.nlm.nih.gov/projects/gap/cgi-bin/analysis.cgi?id=pha000645</a> |
| Metabolic | Lipidsmen | mentg6b        | Age-sex adj TG Offsp men ex6                      | <a href="http://www.ncbi.nlm.nih.gov/projects/gap/cgi-bin/analysis.cgi?id=pha000647">http://www.ncbi.nlm.nih.gov/projects/gap/cgi-bin/analysis.cgi?id=pha000647</a> |



Online Table 2: Phenotypes Evaluated for Association using Family-based Analysis (FBAT)

| Group     | Category         | Trait Label        | Name                                                                       | FBAT Link                                                                                                                                                           |
|-----------|------------------|--------------------|----------------------------------------------------------------------------|---------------------------------------------------------------------------------------------------------------------------------------------------------------------|
| Metabolic | Lipidswomen      | womenmeantgb       | Age-sex adj Mean TG Offsp wom ex1-7                                        | <a href="http://www.ncbi.nlm.nih.gov/projects/gap/cgi-bin/analysis.cgi?id=pha000783">http://www.ncbi.nlm.nih.gov/projects/gap/cgi-bin/analysis.cgi?id=pha000783</a> |
| Metabolic | Lipidswomen      | womentg1a          | Multivariable adj TG Offsp wom ex1                                         | <a href="http://www.ncbi.nlm.nih.gov/projects/gap/cgi-bin/analysis.cgi?id=pha000651">http://www.ncbi.nlm.nih.gov/projects/gap/cgi-bin/analysis.cgi?id=pha000651</a> |
| Metabolic | Lipidswomen      | womentg1b          | Age-sex adj TG Offsp wom ex1                                               | <a href="http://www.ncbi.nlm.nih.gov/projects/gap/cgi-bin/analysis.cgi?id=pha000653">http://www.ncbi.nlm.nih.gov/projects/gap/cgi-bin/analysis.cgi?id=pha000653</a> |
| Metabolic | Lipidswomen      | womentg2b          | Age-sex adj TG Offsp wom ex2                                               | <a href="http://www.ncbi.nlm.nih.gov/projects/gap/cgi-bin/analysis.cgi?id=pha000655">http://www.ncbi.nlm.nih.gov/projects/gap/cgi-bin/analysis.cgi?id=pha000655</a> |
| Metabolic | Lipidswomen      | womentg3b          | Age-sex adj TG Offsp wom ex3                                               | <a href="http://www.ncbi.nlm.nih.gov/projects/gap/cgi-bin/analysis.cgi?id=pha000657">http://www.ncbi.nlm.nih.gov/projects/gap/cgi-bin/analysis.cgi?id=pha000657</a> |
| Metabolic | Lipidswomen      | womentg4b          | Age-sex adj TG Offsp wom ex4                                               | <a href="http://www.ncbi.nlm.nih.gov/projects/gap/cgi-bin/analysis.cgi?id=pha000659">http://www.ncbi.nlm.nih.gov/projects/gap/cgi-bin/analysis.cgi?id=pha000659</a> |
| Metabolic | Lipidswomen      | womentg5b          | Age-sex adj TG Offsp wom ex5                                               | <a href="http://www.ncbi.nlm.nih.gov/projects/gap/cgi-bin/analysis.cgi?id=pha000661">http://www.ncbi.nlm.nih.gov/projects/gap/cgi-bin/analysis.cgi?id=pha000661</a> |
| Metabolic | Lipidswomen      | womentg6b          | Age-sex adj TG Offsp wom ex6                                               | <a href="http://www.ncbi.nlm.nih.gov/projects/gap/cgi-bin/analysis.cgi?id=pha000663">http://www.ncbi.nlm.nih.gov/projects/gap/cgi-bin/analysis.cgi?id=pha000663</a> |
| Metabolic | Lipidswomen      | womentg7b          | Age-sex adj TG Offsp wom ex7                                               | <a href="http://www.ncbi.nlm.nih.gov/projects/gap/cgi-bin/analysis.cgi?id=pha000665">http://www.ncbi.nlm.nih.gov/projects/gap/cgi-bin/analysis.cgi?id=pha000665</a> |
| Metabolic | Lipidswomen      | womenVLDLNMRInt4a  | Multivariable adj NMR VLDL Int Offsp wom ex4                               | <a href="http://www.ncbi.nlm.nih.gov/projects/gap/cgi-bin/analysis.cgi?id=pha000873">http://www.ncbi.nlm.nih.gov/projects/gap/cgi-bin/analysis.cgi?id=pha000873</a> |
| Metabolic | Lipidswomen      | womenVLDLNMRInt4b  | Age-sex adj NMR VLDL Int Offsp wom ex4                                     | <a href="http://www.ncbi.nlm.nih.gov/projects/gap/cgi-bin/analysis.cgi?id=pha000875">http://www.ncbi.nlm.nih.gov/projects/gap/cgi-bin/analysis.cgi?id=pha000875</a> |
| Metabolic | Lipidswomen      | womenVLDLNMRIg4a   | Multivariable adj NMR VLDL Lg Offsp wom ex4                                | <a href="http://www.ncbi.nlm.nih.gov/projects/gap/cgi-bin/analysis.cgi?id=pha000885">http://www.ncbi.nlm.nih.gov/projects/gap/cgi-bin/analysis.cgi?id=pha000885</a> |
| Metabolic | Lipidswomen      | womenVLDLNMRIg4b   | Age-sex adj NMR VLDL Lg Offsp wom ex4                                      | <a href="http://www.ncbi.nlm.nih.gov/projects/gap/cgi-bin/analysis.cgi?id=pha000887">http://www.ncbi.nlm.nih.gov/projects/gap/cgi-bin/analysis.cgi?id=pha000887</a> |
| Metabolic | Lipidswomen      | womenVLDLNMRSm4a   | Multivariable adj NMR VLDL Sm Offsp wom ex4                                | <a href="http://www.ncbi.nlm.nih.gov/projects/gap/cgi-bin/analysis.cgi?id=pha000909">http://www.ncbi.nlm.nih.gov/projects/gap/cgi-bin/analysis.cgi?id=pha000909</a> |
| Metabolic | Lipidswomen      | womenVLDLNMRSm4b   | Age-sex NMR VLDL Sm Offsp wom ex4                                          | <a href="http://www.ncbi.nlm.nih.gov/projects/gap/cgi-bin/analysis.cgi?id=pha000911">http://www.ncbi.nlm.nih.gov/projects/gap/cgi-bin/analysis.cgi?id=pha000911</a> |
| Metabolic | Lipidswomen      | womenVLDLNMRSz4a   | Multivariable adj NMR VLDL Size Offsp wom ex4                              | <a href="http://www.ncbi.nlm.nih.gov/projects/gap/cgi-bin/analysis.cgi?id=pha000897">http://www.ncbi.nlm.nih.gov/projects/gap/cgi-bin/analysis.cgi?id=pha000897</a> |
| Metabolic | Lipidswomen      | womenVLDLNMRSz4b   | Age-sex adj NMR VLDL Size Offsp wom ex4                                    | <a href="http://www.ncbi.nlm.nih.gov/projects/gap/cgi-bin/analysis.cgi?id=pha000899">http://www.ncbi.nlm.nih.gov/projects/gap/cgi-bin/analysis.cgi?id=pha000899</a> |
| Pulmonary | Circadian        | bedtime            | usual weekday bedtime unadjusted                                           | <a href="http://www.ncbi.nlm.nih.gov/projects/gap/cgi-bin/analysis.cgi?id=pha000005">http://www.ncbi.nlm.nih.gov/projects/gap/cgi-bin/analysis.cgi?id=pha000005</a> |
| Pulmonary | Circadian        | bedtimeresid       | usual weekday bedtime adjusted                                             | <a href="http://www.ncbi.nlm.nih.gov/projects/gap/cgi-bin/analysis.cgi?id=pha000007">http://www.ncbi.nlm.nih.gov/projects/gap/cgi-bin/analysis.cgi?id=pha000007</a> |
| Pulmonary | Circadian        | sleepdur           | usual weekday sleep duration unadjusted                                    | <a href="http://www.ncbi.nlm.nih.gov/projects/gap/cgi-bin/analysis.cgi?id=pha000009">http://www.ncbi.nlm.nih.gov/projects/gap/cgi-bin/analysis.cgi?id=pha000009</a> |
| Pulmonary | Circadian        | sleepdurrresid     | usual weekday sleep duration adjusted                                      | <a href="http://www.ncbi.nlm.nih.gov/projects/gap/cgi-bin/analysis.cgi?id=pha000011">http://www.ncbi.nlm.nih.gov/projects/gap/cgi-bin/analysis.cgi?id=pha000011</a> |
| Pulmonary | longitudinal     | fef2575long        | rate of decline of FEF(25-75)                                              | <a href="http://www.ncbi.nlm.nih.gov/projects/gap/cgi-bin/analysis.cgi?id=pha000013">http://www.ncbi.nlm.nih.gov/projects/gap/cgi-bin/analysis.cgi?id=pha000013</a> |
| Pulmonary | longitudinal     | fef2575longsmoke10 | rate of decline of FEF(25-75) in 10+ packyear smokers                      | <a href="http://www.ncbi.nlm.nih.gov/projects/gap/cgi-bin/analysis.cgi?id=pha000015">http://www.ncbi.nlm.nih.gov/projects/gap/cgi-bin/analysis.cgi?id=pha000015</a> |
| Pulmonary | longitudinal     | feffvclong         | rate of decline of FEF(25-75)/FVC                                          | <a href="http://www.ncbi.nlm.nih.gov/projects/gap/cgi-bin/analysis.cgi?id=pha000017">http://www.ncbi.nlm.nih.gov/projects/gap/cgi-bin/analysis.cgi?id=pha000017</a> |
| Pulmonary | longitudinal     | feffvclongsmoke10  | rate of decline of FEF(25-75)/FVC in 10+ packyear smokers                  | <a href="http://www.ncbi.nlm.nih.gov/projects/gap/cgi-bin/analysis.cgi?id=pha000019">http://www.ncbi.nlm.nih.gov/projects/gap/cgi-bin/analysis.cgi?id=pha000019</a> |
| Pulmonary | longitudinal     | fev1fvclong        | rate of decline of FEV1/FVC                                                | <a href="http://www.ncbi.nlm.nih.gov/projects/gap/cgi-bin/analysis.cgi?id=pha000021">http://www.ncbi.nlm.nih.gov/projects/gap/cgi-bin/analysis.cgi?id=pha000021</a> |
| Pulmonary | longitudinal     | fev1fvclongsmoke10 | rate of decline of FEV1/FVC in 10+ packyear smokers                        | <a href="http://www.ncbi.nlm.nih.gov/projects/gap/cgi-bin/analysis.cgi?id=pha000023">http://www.ncbi.nlm.nih.gov/projects/gap/cgi-bin/analysis.cgi?id=pha000023</a> |
| Pulmonary | longitudinal     | fev1long           | rate of decline of FEV1                                                    | <a href="http://www.ncbi.nlm.nih.gov/projects/gap/cgi-bin/analysis.cgi?id=pha000025">http://www.ncbi.nlm.nih.gov/projects/gap/cgi-bin/analysis.cgi?id=pha000025</a> |
| Pulmonary | longitudinal     | fev1longsmoke10    | rate of decline of FEV1 in 10+ packyear smokers                            | <a href="http://www.ncbi.nlm.nih.gov/projects/gap/cgi-bin/analysis.cgi?id=pha000027">http://www.ncbi.nlm.nih.gov/projects/gap/cgi-bin/analysis.cgi?id=pha000027</a> |
| Pulmonary | longitudinal     | fvclong            | rate of decline of FVC                                                     | <a href="http://www.ncbi.nlm.nih.gov/projects/gap/cgi-bin/analysis.cgi?id=pha000029">http://www.ncbi.nlm.nih.gov/projects/gap/cgi-bin/analysis.cgi?id=pha000029</a> |
| Pulmonary | longitudinal     | fvclongsmoke10     | rate of decline of FVC in 10+ packyear smokers                             | <a href="http://www.ncbi.nlm.nih.gov/projects/gap/cgi-bin/analysis.cgi?id=pha000031">http://www.ncbi.nlm.nih.gov/projects/gap/cgi-bin/analysis.cgi?id=pha000031</a> |
| Pulmonary | mean             | genomefev1         | mean FEV1 from 2 examinations                                              | <a href="http://www.ncbi.nlm.nih.gov/projects/gap/cgi-bin/analysis.cgi?id=pha000033">http://www.ncbi.nlm.nih.gov/projects/gap/cgi-bin/analysis.cgi?id=pha000033</a> |
| Pulmonary | mean             | genomefvc          | mean FVC from 2 examinations                                               | <a href="http://www.ncbi.nlm.nih.gov/projects/gap/cgi-bin/analysis.cgi?id=pha000035">http://www.ncbi.nlm.nih.gov/projects/gap/cgi-bin/analysis.cgi?id=pha000035</a> |
| Pulmonary | mean             | genomeratio        | mean FEV1/FVC from 2 examinations                                          | <a href="http://www.ncbi.nlm.nih.gov/projects/gap/cgi-bin/analysis.cgi?id=pha000037">http://www.ncbi.nlm.nih.gov/projects/gap/cgi-bin/analysis.cgi?id=pha000037</a> |
| Pulmonary | ppcrosssectional | ppfefadj           | percent predicted FEF(25-75) at latest exam                                | <a href="http://www.ncbi.nlm.nih.gov/projects/gap/cgi-bin/analysis.cgi?id=pha000039">http://www.ncbi.nlm.nih.gov/projects/gap/cgi-bin/analysis.cgi?id=pha000039</a> |
| Pulmonary | ppcrosssectional | ppfefadjsm10       | percent predicted FEF(25-75) at latest exam in 10+ packyear smokers        | <a href="http://www.ncbi.nlm.nih.gov/projects/gap/cgi-bin/analysis.cgi?id=pha000041">http://www.ncbi.nlm.nih.gov/projects/gap/cgi-bin/analysis.cgi?id=pha000041</a> |
| Pulmonary | ppcrosssectional | ppfefratadj        | percent predicted FEF(25-75)/FVC at latest exam                            | <a href="http://www.ncbi.nlm.nih.gov/projects/gap/cgi-bin/analysis.cgi?id=pha000043">http://www.ncbi.nlm.nih.gov/projects/gap/cgi-bin/analysis.cgi?id=pha000043</a> |
| Pulmonary | ppcrosssectional | ppfefratadjsm10    | percent predicted FEF(25-75)/FVC latest exam, 10+ packyear smokers         | <a href="http://www.ncbi.nlm.nih.gov/projects/gap/cgi-bin/analysis.cgi?id=pha000045">http://www.ncbi.nlm.nih.gov/projects/gap/cgi-bin/analysis.cgi?id=pha000045</a> |
| Pulmonary | ppcrosssectional | ppfev1adj          | percent predicted FEV1 at latest exam                                      | <a href="http://www.ncbi.nlm.nih.gov/projects/gap/cgi-bin/analysis.cgi?id=pha000047">http://www.ncbi.nlm.nih.gov/projects/gap/cgi-bin/analysis.cgi?id=pha000047</a> |
| Pulmonary | ppcrosssectional | ppfev1adjsm10      | percent predicted FEV1 at latest exam in 10+ packyear smokers              | <a href="http://www.ncbi.nlm.nih.gov/projects/gap/cgi-bin/analysis.cgi?id=pha000049">http://www.ncbi.nlm.nih.gov/projects/gap/cgi-bin/analysis.cgi?id=pha000049</a> |
| Pulmonary | ppcrosssectional | ppfvcaadj          | percent predicted FVC at latest exam                                       | <a href="http://www.ncbi.nlm.nih.gov/projects/gap/cgi-bin/analysis.cgi?id=pha000051">http://www.ncbi.nlm.nih.gov/projects/gap/cgi-bin/analysis.cgi?id=pha000051</a> |
| Pulmonary | ppcrosssectional | ppfvcaadjsm10      | percent predicted FVC at latest exam in 10+ packyear smokers               | <a href="http://www.ncbi.nlm.nih.gov/projects/gap/cgi-bin/analysis.cgi?id=pha000053">http://www.ncbi.nlm.nih.gov/projects/gap/cgi-bin/analysis.cgi?id=pha000053</a> |
| Pulmonary | ppcrosssectional | ppratioadj         | percent predicted FEV1/FVC at latest exam                                  | <a href="http://www.ncbi.nlm.nih.gov/projects/gap/cgi-bin/analysis.cgi?id=pha000055">http://www.ncbi.nlm.nih.gov/projects/gap/cgi-bin/analysis.cgi?id=pha000055</a> |
| Pulmonary | ppcrosssectional | ppratioadjsm10     | percent predicted FEV1/FVC at latest exam in 10+ packyear smokers          | <a href="http://www.ncbi.nlm.nih.gov/projects/gap/cgi-bin/analysis.cgi?id=pha000057">http://www.ncbi.nlm.nih.gov/projects/gap/cgi-bin/analysis.cgi?id=pha000057</a> |
| Pulmonary | ccrosssectional  | rfefadj            | residual from predicted FEF(25-75) at latest exam                          | <a href="http://www.ncbi.nlm.nih.gov/projects/gap/cgi-bin/analysis.cgi?id=pha000059">http://www.ncbi.nlm.nih.gov/projects/gap/cgi-bin/analysis.cgi?id=pha000059</a> |
| Pulmonary | ccrosssectional  | rfefadjsm10        | residual from predicted FEF(25-75) at latest exam in 10+ packyear smokers  | <a href="http://www.ncbi.nlm.nih.gov/projects/gap/cgi-bin/analysis.cgi?id=pha000061">http://www.ncbi.nlm.nih.gov/projects/gap/cgi-bin/analysis.cgi?id=pha000061</a> |
| Pulmonary | ccrosssectional  | rfefratadj         | residual from predicted FEF(25-75)/FVC at latest exam                      | <a href="http://www.ncbi.nlm.nih.gov/projects/gap/cgi-bin/analysis.cgi?id=pha000063">http://www.ncbi.nlm.nih.gov/projects/gap/cgi-bin/analysis.cgi?id=pha000063</a> |
| Pulmonary | ccrosssectional  | rfefratadjsm10     | residual from predicted FEF(25-75)/FVC latest exam in 10+ packyear smokers | <a href="http://www.ncbi.nlm.nih.gov/projects/gap/cgi-bin/analysis.cgi?id=pha000065">http://www.ncbi.nlm.nih.gov/projects/gap/cgi-bin/analysis.cgi?id=pha000065</a> |
| Pulmonary | ccrosssectional  | rfev1adj           | residual from predicted FEV1 at latest exam                                | <a href="http://www.ncbi.nlm.nih.gov/projects/gap/cgi-bin/analysis.cgi?id=pha000067">http://www.ncbi.nlm.nih.gov/projects/gap/cgi-bin/analysis.cgi?id=pha000067</a> |
| Pulmonary | ccrosssectional  | rfev1adjsm10       | residual from predicted FEV1 at latest exam in 10+ packyear smokers        | <a href="http://www.ncbi.nlm.nih.gov/projects/gap/cgi-bin/analysis.cgi?id=pha000069">http://www.ncbi.nlm.nih.gov/projects/gap/cgi-bin/analysis.cgi?id=pha000069</a> |
| Pulmonary | ccrosssectional  | rfvcaadj           | residual from predicted FVC at latest exam                                 | <a href="http://www.ncbi.nlm.nih.gov/projects/gap/cgi-bin/analysis.cgi?id=pha000071">http://www.ncbi.nlm.nih.gov/projects/gap/cgi-bin/analysis.cgi?id=pha000071</a> |
| Pulmonary | ccrosssectional  | rfvcaadjsm10       | residual from predicted FVC at latest exam in 10+ packyear smokers         | <a href="http://www.ncbi.nlm.nih.gov/projects/gap/cgi-bin/analysis.cgi?id=pha000073">http://www.ncbi.nlm.nih.gov/projects/gap/cgi-bin/analysis.cgi?id=pha000073</a> |
| Pulmonary | ccrosssectional  | rratioadj          | residual from predicted FEV1/FVC at latest exam                            | <a href="http://www.ncbi.nlm.nih.gov/projects/gap/cgi-bin/analysis.cgi?id=pha000075">http://www.ncbi.nlm.nih.gov/projects/gap/cgi-bin/analysis.cgi?id=pha000075</a> |
| Pulmonary | ccrosssectional  | rratioadjsm10      | residual from predicted FEV1/FVC at latest exam in 10+ packyear smokers    | <a href="http://www.ncbi.nlm.nih.gov/projects/gap/cgi-bin/analysis.cgi?id=pha000077">http://www.ncbi.nlm.nih.gov/projects/gap/cgi-bin/analysis.cgi?id=pha000077</a> |
| Pulmonary | SDB              | rdiresid           | apnea-hypopnea index with 4% desaturation adjusted                         | <a href="http://www.ncbi.nlm.nih.gov/projects/gap/cgi-bin/analysis.cgi?id=pha000079">http://www.ncbi.nlm.nih.gov/projects/gap/cgi-bin/analysis.cgi?id=pha000079</a> |
| Pulmonary | singleexam       | ppfev1single       | percent predicted FEV1, exam: offspring 6, cohort 17                       | <a href="http://www.ncbi.nlm.nih.gov/projects/gap/cgi-bin/analysis.cgi?id=pha000081">http://www.ncbi.nlm.nih.gov/projects/gap/cgi-bin/analysis.cgi?id=pha000081</a> |



Online Table 2: Phenotypes Evaluated for Association using Family-based Analysis (FBAT)

| Group     | Category   | Trait Label        | Name                                                                 | FBAT Link                                                                                                                                                           |
|-----------|------------|--------------------|----------------------------------------------------------------------|---------------------------------------------------------------------------------------------------------------------------------------------------------------------|
| Pulmonary | singleexam | ppfvcsingle        | percent predicted FVC, exam: offspring 6, cohort 17                  | <a href="http://www.ncbi.nlm.nih.gov/projects/gap/cgi-bin/analysis.cgi?id=pha000083">http://www.ncbi.nlm.nih.gov/projects/gap/cgi-bin/analysis.cgi?id=pha000083</a> |
| Pulmonary | singleexam | ppratiosingle      | percent predicted FEV1/FVC, exam: offspring 6, cohort 17             | <a href="http://www.ncbi.nlm.nih.gov/projects/gap/cgi-bin/analysis.cgi?id=pha000085">http://www.ncbi.nlm.nih.gov/projects/gap/cgi-bin/analysis.cgi?id=pha000085</a> |
| Pulmonary | singleexam | rfev1single        | residual from predicted FEV1, exam: offspring 6, cohort 17           | <a href="http://www.ncbi.nlm.nih.gov/projects/gap/cgi-bin/analysis.cgi?id=pha000087">http://www.ncbi.nlm.nih.gov/projects/gap/cgi-bin/analysis.cgi?id=pha000087</a> |
| Pulmonary | singleexam | rffcvsingle        | residual from predicted FVC, exam: offspring 6, cohort 17            | <a href="http://www.ncbi.nlm.nih.gov/projects/gap/cgi-bin/analysis.cgi?id=pha000089">http://www.ncbi.nlm.nih.gov/projects/gap/cgi-bin/analysis.cgi?id=pha000089</a> |
| Pulmonary | singleexam | rfratiosingle      | residual from predicted FEV1/FVC, exam: offspring 6, cohort 17       | <a href="http://www.ncbi.nlm.nih.gov/projects/gap/cgi-bin/analysis.cgi?id=pha000091">http://www.ncbi.nlm.nih.gov/projects/gap/cgi-bin/analysis.cgi?id=pha000091</a> |
| Pulmonary | Sleepiness | ess                | Epworth Sleepiness Scale, unadjusted                                 | <a href="http://www.ncbi.nlm.nih.gov/projects/gap/cgi-bin/analysis.cgi?id=pha000093">http://www.ncbi.nlm.nih.gov/projects/gap/cgi-bin/analysis.cgi?id=pha000093</a> |
| Pulmonary | Sleepiness | essresid1          | Epworth Sleepiness Scale, adjusted A                                 | <a href="http://www.ncbi.nlm.nih.gov/projects/gap/cgi-bin/analysis.cgi?id=pha000095">http://www.ncbi.nlm.nih.gov/projects/gap/cgi-bin/analysis.cgi?id=pha000095</a> |
| Pulmonary | Sleepiness | essresid2          | Epworth Sleepiness Scale, adjusted B                                 | <a href="http://www.ncbi.nlm.nih.gov/projects/gap/cgi-bin/analysis.cgi?id=pha000097">http://www.ncbi.nlm.nih.gov/projects/gap/cgi-bin/analysis.cgi?id=pha000097</a> |
| Pulmonary | Sleepiness | essresid3          | Epworth Sleepiness Scale, adjusted C                                 | <a href="http://www.ncbi.nlm.nih.gov/projects/gap/cgi-bin/analysis.cgi?id=pha000099">http://www.ncbi.nlm.nih.gov/projects/gap/cgi-bin/analysis.cgi?id=pha000099</a> |
| RENALENDO | ENDO       | DHEASAS3           | DHEAS adjusted for age and sex                                       | <a href="http://www.ncbi.nlm.nih.gov/projects/gap/cgi-bin/analysis.cgi?id=pha001219">http://www.ncbi.nlm.nih.gov/projects/gap/cgi-bin/analysis.cgi?id=pha001219</a> |
| RENALENDO | ENDO       | DHEASMV3           | DHEAS MV adjusted                                                    | <a href="http://www.ncbi.nlm.nih.gov/projects/gap/cgi-bin/analysis.cgi?id=pha001221">http://www.ncbi.nlm.nih.gov/projects/gap/cgi-bin/analysis.cgi?id=pha001221</a> |
| RENALENDO | ENDO       | FSHAS3             | FSH in men or post meno women no hormones, age-sex adjusted          | <a href="http://www.ncbi.nlm.nih.gov/projects/gap/cgi-bin/analysis.cgi?id=pha001223">http://www.ncbi.nlm.nih.gov/projects/gap/cgi-bin/analysis.cgi?id=pha001223</a> |
| RENALENDO | ENDO       | FSHNMV3            | FSH in men or post meno women no hormones, MV adjusted               | <a href="http://www.ncbi.nlm.nih.gov/projects/gap/cgi-bin/analysis.cgi?id=pha001225">http://www.ncbi.nlm.nih.gov/projects/gap/cgi-bin/analysis.cgi?id=pha001225</a> |
| RENALENDO | ENDO       | LHAS3              | LH in men or post-meno women no hormones, age-sex adjusted           | <a href="http://www.ncbi.nlm.nih.gov/projects/gap/cgi-bin/analysis.cgi?id=pha001227">http://www.ncbi.nlm.nih.gov/projects/gap/cgi-bin/analysis.cgi?id=pha001227</a> |
| RENALENDO | ENDO       | LHMV3              | LH in men or post-meno women no hormones, MV adjusted                | <a href="http://www.ncbi.nlm.nih.gov/projects/gap/cgi-bin/analysis.cgi?id=pha001229">http://www.ncbi.nlm.nih.gov/projects/gap/cgi-bin/analysis.cgi?id=pha001229</a> |
| RENALENDO | ENDO       | TSHLNAS3           | TSH from ex3 log transformed, age-sex adjusted                       | <a href="http://www.ncbi.nlm.nih.gov/projects/gap/cgi-bin/analysis.cgi?id=pha001231">http://www.ncbi.nlm.nih.gov/projects/gap/cgi-bin/analysis.cgi?id=pha001231</a> |
| RENALENDO | ENDO       | TSHLNAS4           | TSH from ex4 log transformed, age-sex adjusted                       | <a href="http://www.ncbi.nlm.nih.gov/projects/gap/cgi-bin/analysis.cgi?id=pha001233">http://www.ncbi.nlm.nih.gov/projects/gap/cgi-bin/analysis.cgi?id=pha001233</a> |
| RENALENDO | ENDO       | TSHLNMV3           | TSH ex3 log transformed, MV adjusted                                 | <a href="http://www.ncbi.nlm.nih.gov/projects/gap/cgi-bin/analysis.cgi?id=pha001235">http://www.ncbi.nlm.nih.gov/projects/gap/cgi-bin/analysis.cgi?id=pha001235</a> |
| RENALENDO | ENDO       | TSHLNMV4           | TSH ex4 log transformed, MV adjusted                                 | <a href="http://www.ncbi.nlm.nih.gov/projects/gap/cgi-bin/analysis.cgi?id=pha001237">http://www.ncbi.nlm.nih.gov/projects/gap/cgi-bin/analysis.cgi?id=pha001237</a> |
| RENALENDO | ENDO       | TSHMEAN34LNAS      | Mean TSH log transformed, mean of ex3 and ex4, age sex adjusted      | <a href="http://www.ncbi.nlm.nih.gov/projects/gap/cgi-bin/analysis.cgi?id=pha001239">http://www.ncbi.nlm.nih.gov/projects/gap/cgi-bin/analysis.cgi?id=pha001239</a> |
| RENALENDO | ENDO       | TSHMEAN34LNMV      | Mean TSH ex3 and 4, MV adjusted                                      | <a href="http://www.ncbi.nlm.nih.gov/projects/gap/cgi-bin/analysis.cgi?id=pha001241">http://www.ncbi.nlm.nih.gov/projects/gap/cgi-bin/analysis.cgi?id=pha001241</a> |
| RENALENDO | RENAL      | CALCIUMAS2         | Calcium, ex2, age-sex adjusted                                       | <a href="http://www.ncbi.nlm.nih.gov/projects/gap/cgi-bin/analysis.cgi?id=pha001243">http://www.ncbi.nlm.nih.gov/projects/gap/cgi-bin/analysis.cgi?id=pha001243</a> |
| RENALENDO | RENAL      | CALCIUMMV2         | Calcium, ex2, age-sex-creatinine adjusted                            | <a href="http://www.ncbi.nlm.nih.gov/projects/gap/cgi-bin/analysis.cgi?id=pha001245">http://www.ncbi.nlm.nih.gov/projects/gap/cgi-bin/analysis.cgi?id=pha001245</a> |
| RENALENDO | RENAL      | CHNGSCR27ASWIN     | Change in creatinine ex2 to 7, age-sex adjusted                      | <a href="http://www.ncbi.nlm.nih.gov/projects/gap/cgi-bin/analysis.cgi?id=pha001247">http://www.ncbi.nlm.nih.gov/projects/gap/cgi-bin/analysis.cgi?id=pha001247</a> |
| RENALENDO | RENAL      | CHNGSCR27MVWIN     | Change in creatinine ex2 to 7, MV adjusted                           | <a href="http://www.ncbi.nlm.nih.gov/projects/gap/cgi-bin/analysis.cgi?id=pha001249">http://www.ncbi.nlm.nih.gov/projects/gap/cgi-bin/analysis.cgi?id=pha001249</a> |
| RENALENDO | RENAL      | CKDAS7             | CKD ex 7, age-sex adjusted                                           | <a href="http://www.ncbi.nlm.nih.gov/projects/gap/cgi-bin/analysis.cgi?id=pha001251">http://www.ncbi.nlm.nih.gov/projects/gap/cgi-bin/analysis.cgi?id=pha001251</a> |
| RENALENDO | RENAL      | CKDMV7             | CKD ex 7, MV adjusted                                                | <a href="http://www.ncbi.nlm.nih.gov/projects/gap/cgi-bin/analysis.cgi?id=pha001253">http://www.ncbi.nlm.nih.gov/projects/gap/cgi-bin/analysis.cgi?id=pha001253</a> |
| RENALENDO | RENAL      | CYSCAS7            | Cystatin C, ex 7, age-sex adjusted                                   | <a href="http://www.ncbi.nlm.nih.gov/projects/gap/cgi-bin/analysis.cgi?id=pha001327">http://www.ncbi.nlm.nih.gov/projects/gap/cgi-bin/analysis.cgi?id=pha001327</a> |
| RENALENDO | RENAL      | CYSCMV7            | Cystatin C, ex 7, MV adjusted                                        | <a href="http://www.ncbi.nlm.nih.gov/projects/gap/cgi-bin/analysis.cgi?id=pha001329">http://www.ncbi.nlm.nih.gov/projects/gap/cgi-bin/analysis.cgi?id=pha001329</a> |
| RENALENDO | RENAL      | GFRAS5             | GFR ex 5, age-sex adjusted                                           | <a href="http://www.ncbi.nlm.nih.gov/projects/gap/cgi-bin/analysis.cgi?id=pha001355">http://www.ncbi.nlm.nih.gov/projects/gap/cgi-bin/analysis.cgi?id=pha001355</a> |
| RENALENDO | RENAL      | GFRAS6             | GFR ex 6, age-sex adjusted                                           | <a href="http://www.ncbi.nlm.nih.gov/projects/gap/cgi-bin/analysis.cgi?id=pha001257">http://www.ncbi.nlm.nih.gov/projects/gap/cgi-bin/analysis.cgi?id=pha001257</a> |
| RENALENDO | RENAL      | GFRAS7             | GFR ex 7, age-sex adjusted                                           | <a href="http://www.ncbi.nlm.nih.gov/projects/gap/cgi-bin/analysis.cgi?id=pha001259">http://www.ncbi.nlm.nih.gov/projects/gap/cgi-bin/analysis.cgi?id=pha001259</a> |
| RENALENDO | RENAL      | GFRASWIN2          | GFR ex2, winsorized, age-sex adjusted                                | <a href="http://www.ncbi.nlm.nih.gov/projects/gap/cgi-bin/analysis.cgi?id=pha001261">http://www.ncbi.nlm.nih.gov/projects/gap/cgi-bin/analysis.cgi?id=pha001261</a> |
| RENALENDO | RENAL      | GFRMV5             | GFR ex5, MV adjusted                                                 | <a href="http://www.ncbi.nlm.nih.gov/projects/gap/cgi-bin/analysis.cgi?id=pha001263">http://www.ncbi.nlm.nih.gov/projects/gap/cgi-bin/analysis.cgi?id=pha001263</a> |
| RENALENDO | RENAL      | GFRMV6             | GFR ex6, MV adjusted                                                 | <a href="http://www.ncbi.nlm.nih.gov/projects/gap/cgi-bin/analysis.cgi?id=pha001265">http://www.ncbi.nlm.nih.gov/projects/gap/cgi-bin/analysis.cgi?id=pha001265</a> |
| RENALENDO | RENAL      | GFRMV7             | GFR ex7, MV adjusted                                                 | <a href="http://www.ncbi.nlm.nih.gov/projects/gap/cgi-bin/analysis.cgi?id=pha001267">http://www.ncbi.nlm.nih.gov/projects/gap/cgi-bin/analysis.cgi?id=pha001267</a> |
| RENALENDO | RENAL      | GFRMVWIN2          | GFR ex2, winsorized, MV adjusted                                     | <a href="http://www.ncbi.nlm.nih.gov/projects/gap/cgi-bin/analysis.cgi?id=pha001269">http://www.ncbi.nlm.nih.gov/projects/gap/cgi-bin/analysis.cgi?id=pha001269</a> |
| RENALENDO | RENAL      | MeanGFRAS2567WIN   | Mean GFR ex 2,5,6,7 age-sex adjusted                                 | <a href="http://www.ncbi.nlm.nih.gov/projects/gap/cgi-bin/analysis.cgi?id=pha001271">http://www.ncbi.nlm.nih.gov/projects/gap/cgi-bin/analysis.cgi?id=pha001271</a> |
| RENALENDO | RENAL      | MeanGFRMV2567WIN   | Mean GFR ex 2,5,6,7, MV adjusted                                     | <a href="http://www.ncbi.nlm.nih.gov/projects/gap/cgi-bin/analysis.cgi?id=pha001273">http://www.ncbi.nlm.nih.gov/projects/gap/cgi-bin/analysis.cgi?id=pha001273</a> |
| RENALENDO | RENAL      | MeanSCR2567LNASWIN | Mean creatinine ex 2,5,6,7 age-sex adjusted                          | <a href="http://www.ncbi.nlm.nih.gov/projects/gap/cgi-bin/analysis.cgi?id=pha001275">http://www.ncbi.nlm.nih.gov/projects/gap/cgi-bin/analysis.cgi?id=pha001275</a> |
| RENALENDO | RENAL      | MeanSCR2567LNMVWIN | Mean creatinine ex 2,5,6,7, MV adjusted                              | <a href="http://www.ncbi.nlm.nih.gov/projects/gap/cgi-bin/analysis.cgi?id=pha001277">http://www.ncbi.nlm.nih.gov/projects/gap/cgi-bin/analysis.cgi?id=pha001277</a> |
| RENALENDO | RENAL      | MeanURICACID12AS   | Mean uric acid, ex 1 and 2, age-sex adjusted                         | <a href="http://www.ncbi.nlm.nih.gov/projects/gap/cgi-bin/analysis.cgi?id=pha001279">http://www.ncbi.nlm.nih.gov/projects/gap/cgi-bin/analysis.cgi?id=pha001279</a> |
| RENALENDO | RENAL      | MeanURICACID12MV   | Mean uric acid, ex 1 and 2, MV adjusted                              | <a href="http://www.ncbi.nlm.nih.gov/projects/gap/cgi-bin/analysis.cgi?id=pha001281">http://www.ncbi.nlm.nih.gov/projects/gap/cgi-bin/analysis.cgi?id=pha001281</a> |
| RENALENDO | RENAL      | PHOSAS2            | Phos, ex 2, age-sex adjusted                                         | <a href="http://www.ncbi.nlm.nih.gov/projects/gap/cgi-bin/analysis.cgi?id=pha001283">http://www.ncbi.nlm.nih.gov/projects/gap/cgi-bin/analysis.cgi?id=pha001283</a> |
| RENALENDO | RENAL      | PHOSMV2            | Phos, ex 2, MV adjusted                                              | <a href="http://www.ncbi.nlm.nih.gov/projects/gap/cgi-bin/analysis.cgi?id=pha001285">http://www.ncbi.nlm.nih.gov/projects/gap/cgi-bin/analysis.cgi?id=pha001285</a> |
| RENALENDO | RENAL      | SCRLNAS5           | Creatinine, ex5, age-sex adjusted                                    | <a href="http://www.ncbi.nlm.nih.gov/projects/gap/cgi-bin/analysis.cgi?id=pha001287">http://www.ncbi.nlm.nih.gov/projects/gap/cgi-bin/analysis.cgi?id=pha001287</a> |
| RENALENDO | RENAL      | SCRLNAS6           | Creatinine, ex6, age-sex adjusted                                    | <a href="http://www.ncbi.nlm.nih.gov/projects/gap/cgi-bin/analysis.cgi?id=pha001289">http://www.ncbi.nlm.nih.gov/projects/gap/cgi-bin/analysis.cgi?id=pha001289</a> |
| RENALENDO | RENAL      | SCRLNASWIN2        | Creatinine ex2, log transformed and winsorized, age-sex adjusted     | <a href="http://www.ncbi.nlm.nih.gov/projects/gap/cgi-bin/analysis.cgi?id=pha001291">http://www.ncbi.nlm.nih.gov/projects/gap/cgi-bin/analysis.cgi?id=pha001291</a> |
| RENALENDO | RENAL      | SCRLNASWIN7        | Creatinine ex7, log transformed and winsorized, age-sex adjusted     | <a href="http://www.ncbi.nlm.nih.gov/projects/gap/cgi-bin/analysis.cgi?id=pha001293">http://www.ncbi.nlm.nih.gov/projects/gap/cgi-bin/analysis.cgi?id=pha001293</a> |
| RENALENDO | RENAL      | SCRLNMV5           | GFR ex 5 uncalibrated creatinine, MV adjusted                        | <a href="http://www.ncbi.nlm.nih.gov/projects/gap/cgi-bin/analysis.cgi?id=pha001295">http://www.ncbi.nlm.nih.gov/projects/gap/cgi-bin/analysis.cgi?id=pha001295</a> |
| RENALENDO | RENAL      | SCRLNMV6           | GFR ex 6 uncalibrated creatinine, MV adjusted                        | <a href="http://www.ncbi.nlm.nih.gov/projects/gap/cgi-bin/analysis.cgi?id=pha001297">http://www.ncbi.nlm.nih.gov/projects/gap/cgi-bin/analysis.cgi?id=pha001297</a> |
| RENALENDO | RENAL      | SCRLNMVWIN2        | Creatinine ex 2 log transformed winsorized MV adjusted               | <a href="http://www.ncbi.nlm.nih.gov/projects/gap/cgi-bin/analysis.cgi?id=pha001299">http://www.ncbi.nlm.nih.gov/projects/gap/cgi-bin/analysis.cgi?id=pha001299</a> |
| RENALENDO | RENAL      | SCRLNMVWIN7        | Creatinine ex 7 uncalibrated MV adjusted                             | <a href="http://www.ncbi.nlm.nih.gov/projects/gap/cgi-bin/analysis.cgi?id=pha001301">http://www.ncbi.nlm.nih.gov/projects/gap/cgi-bin/analysis.cgi?id=pha001301</a> |
| RENALENDO | RENAL      | UAEGE30HTNAS6      | UAE of at least 30 in enriched hypertensive sample, age-sex adjusted | <a href="http://www.ncbi.nlm.nih.gov/projects/gap/cgi-bin/analysis.cgi?id=pha001303">http://www.ncbi.nlm.nih.gov/projects/gap/cgi-bin/analysis.cgi?id=pha001303</a> |
| RENALENDO | RENAL      | UAEGE30HTNMV6      | UAE of at least 30 in enriched hypertensive sample, age-sex adjusted | <a href="http://www.ncbi.nlm.nih.gov/projects/gap/cgi-bin/analysis.cgi?id=pha001305">http://www.ncbi.nlm.nih.gov/projects/gap/cgi-bin/analysis.cgi?id=pha001305</a> |
| RENALENDO | RENAL      | UAELNAS6           | Log-transformed UAE, age-sex adjusted                                | <a href="http://www.ncbi.nlm.nih.gov/projects/gap/cgi-bin/analysis.cgi?id=pha001307">http://www.ncbi.nlm.nih.gov/projects/gap/cgi-bin/analysis.cgi?id=pha001307</a> |

Online Table 2: Phenotypes Evaluated for Association using Family-based Analysis (FBAT)

| Group      | Category            | Trait Label        | Name                                                                            | FBAT Link                                                                                                                                                           |
|------------|---------------------|--------------------|---------------------------------------------------------------------------------|---------------------------------------------------------------------------------------------------------------------------------------------------------------------|
| RENALEND   | RENAL               | UAELNHTNAS6        | Log-transformed UAE in HTN enriched sample, age-sex adjusted                    | <a href="http://www.ncbi.nlm.nih.gov/projects/gap/cgi-bin/analysis.cgi?id=pha001309">http://www.ncbi.nlm.nih.gov/projects/gap/cgi-bin/analysis.cgi?id=pha001309</a> |
| RENALEND   | RENAL               | UAELNHTNMV6        | Log-transformed UAE in HTN enriched sample, MV adjusted                         | <a href="http://www.ncbi.nlm.nih.gov/projects/gap/cgi-bin/analysis.cgi?id=pha001311">http://www.ncbi.nlm.nih.gov/projects/gap/cgi-bin/analysis.cgi?id=pha001311</a> |
| RENALEND   | RENAL               | UAELNMV6           | Log-transformed UAE, MV adjusted                                                | <a href="http://www.ncbi.nlm.nih.gov/projects/gap/cgi-bin/analysis.cgi?id=pha001313">http://www.ncbi.nlm.nih.gov/projects/gap/cgi-bin/analysis.cgi?id=pha001313</a> |
| RENALEND   | RENAL               | UNALNASWIN6        | Urinary sodium, age-sex adjusted                                                | <a href="http://www.ncbi.nlm.nih.gov/projects/gap/cgi-bin/analysis.cgi?id=pha001315">http://www.ncbi.nlm.nih.gov/projects/gap/cgi-bin/analysis.cgi?id=pha001315</a> |
| RENALEND   | RENAL               | UNALNMVWIN6        | Urinary sodium, MV adjusted                                                     | <a href="http://www.ncbi.nlm.nih.gov/projects/gap/cgi-bin/analysis.cgi?id=pha001317">http://www.ncbi.nlm.nih.gov/projects/gap/cgi-bin/analysis.cgi?id=pha001317</a> |
| RENALEND   | RENAL               | URICACIDAS1        | Uric acid, ex 1, age-sex adjusted                                               | <a href="http://www.ncbi.nlm.nih.gov/projects/gap/cgi-bin/analysis.cgi?id=pha001319">http://www.ncbi.nlm.nih.gov/projects/gap/cgi-bin/analysis.cgi?id=pha001319</a> |
| RENALEND   | RENAL               | URICACIDAS2        | Uric acid, ex 2, age-sex adjusted                                               | <a href="http://www.ncbi.nlm.nih.gov/projects/gap/cgi-bin/analysis.cgi?id=pha001321">http://www.ncbi.nlm.nih.gov/projects/gap/cgi-bin/analysis.cgi?id=pha001321</a> |
| RENALEND   | RENAL               | URICACIDMV1        | Uric acid, ex1, MV adjusted                                                     | <a href="http://www.ncbi.nlm.nih.gov/projects/gap/cgi-bin/analysis.cgi?id=pha001323">http://www.ncbi.nlm.nih.gov/projects/gap/cgi-bin/analysis.cgi?id=pha001323</a> |
| RENALEND   | RENAL               | URICACIDMV2        | Uric acid, ex2, MV adjusted                                                     | <a href="http://www.ncbi.nlm.nih.gov/projects/gap/cgi-bin/analysis.cgi?id=pha001325">http://www.ncbi.nlm.nih.gov/projects/gap/cgi-bin/analysis.cgi?id=pha001325</a> |
| SubclinCVD | Ankle-brachialindex | RANKLEBI6          | Ankle-brachial index, cycle 6, age and sex-djusted                              | <a href="http://www.ncbi.nlm.nih.gov/projects/gap/cgi-bin/analysis.cgi?id=pha000927">http://www.ncbi.nlm.nih.gov/projects/gap/cgi-bin/analysis.cgi?id=pha000927</a> |
| SubclinCVD | Ankle-brachialindex | RANKLEBI6MV        | Ankle-brachial index, cycle 6, multivariable-adjusted                           | <a href="http://www.ncbi.nlm.nih.gov/projects/gap/cgi-bin/analysis.cgi?id=pha000929">http://www.ncbi.nlm.nih.gov/projects/gap/cgi-bin/analysis.cgi?id=pha000929</a> |
| SubclinCVD | Ankle-brachialindex | RANKLEBI7          | Ankle-brachial index, cycle 7, age- and sex-adjusted                            | <a href="http://www.ncbi.nlm.nih.gov/projects/gap/cgi-bin/analysis.cgi?id=pha000931">http://www.ncbi.nlm.nih.gov/projects/gap/cgi-bin/analysis.cgi?id=pha000931</a> |
| SubclinCVD | Ankle-brachialindex | RANKLEBI7MV        | Ankle-brachial index, cycle 7, multivariable-adjusted                           | <a href="http://www.ncbi.nlm.nih.gov/projects/gap/cgi-bin/analysis.cgi?id=pha000933">http://www.ncbi.nlm.nih.gov/projects/gap/cgi-bin/analysis.cgi?id=pha000933</a> |
| SubclinCVD | BrainMRI            | BMRILWMHVC         | Log white matter hyperintensity to intracranial volume ratio, age and sex       | <a href="http://www.ncbi.nlm.nih.gov/projects/gap/cgi-bin/analysis.cgi?id=pha000935">http://www.ncbi.nlm.nih.gov/projects/gap/cgi-bin/analysis.cgi?id=pha000935</a> |
| SubclinCVD | BrainMRI            | BMRILWMHVMV        | Log white matter hyperintensity to intracranial volume ratio, multivariable     | <a href="http://www.ncbi.nlm.nih.gov/projects/gap/cgi-bin/analysis.cgi?id=pha000937">http://www.ncbi.nlm.nih.gov/projects/gap/cgi-bin/analysis.cgi?id=pha000937</a> |
| SubclinCVD | BrainMRI            | BMRIZLWMHVC        | Z-score log white matter hyperintensity volume ratio, sex adjusted              | <a href="http://www.ncbi.nlm.nih.gov/projects/gap/cgi-bin/analysis.cgi?id=pha000939">http://www.ncbi.nlm.nih.gov/projects/gap/cgi-bin/analysis.cgi?id=pha000939</a> |
| SubclinCVD | BrainMRI            | BMRIZLWMHVMV       | Z-score log white matter hyperintensity volume ratio, multivariable             | <a href="http://www.ncbi.nlm.nih.gov/projects/gap/cgi-bin/analysis.cgi?id=pha000941">http://www.ncbi.nlm.nih.gov/projects/gap/cgi-bin/analysis.cgi?id=pha000941</a> |
| SubclinCVD | Carotid             | RNKCAROTBULBAS6    | Carotid bulb IMT mean max, cycle 6, log transformed age and sex-adjusted        | <a href="http://www.ncbi.nlm.nih.gov/projects/gap/cgi-bin/analysis.cgi?id=pha000943">http://www.ncbi.nlm.nih.gov/projects/gap/cgi-bin/analysis.cgi?id=pha000943</a> |
| SubclinCVD | Carotid             | RNKCAROTBULBMV6    | Carotid bulb IMT mean max, cycle 6, log transformed multivariable-adjusted      | <a href="http://www.ncbi.nlm.nih.gov/projects/gap/cgi-bin/analysis.cgi?id=pha000945">http://www.ncbi.nlm.nih.gov/projects/gap/cgi-bin/analysis.cgi?id=pha000945</a> |
| SubclinCVD | Carotid             | RNKCAROTCCAMAXAS6  | Common carotid IMT mean max, cycle 6, log transformed age and sex-adjusted      | <a href="http://www.ncbi.nlm.nih.gov/projects/gap/cgi-bin/analysis.cgi?id=pha000947">http://www.ncbi.nlm.nih.gov/projects/gap/cgi-bin/analysis.cgi?id=pha000947</a> |
| SubclinCVD | Carotid             | RNKCAROTCCAMAXMV6  | Common carotid IMT mean max, cycle 6, log transformed multivariable-adjusted    | <a href="http://www.ncbi.nlm.nih.gov/projects/gap/cgi-bin/analysis.cgi?id=pha000949">http://www.ncbi.nlm.nih.gov/projects/gap/cgi-bin/analysis.cgi?id=pha000949</a> |
| SubclinCVD | Carotid             | RNKCAROTCCAMEANAS6 | Common carotid IMT mean mean, cycle 6, log transformed age and sex-adjusted     | <a href="http://www.ncbi.nlm.nih.gov/projects/gap/cgi-bin/analysis.cgi?id=pha000951">http://www.ncbi.nlm.nih.gov/projects/gap/cgi-bin/analysis.cgi?id=pha000951</a> |
| SubclinCVD | Carotid             | RNKCAROTCCAMEANMV6 | Common carotid IMT mean mean, cycle 6, log transformed multivariable-adjusted   | <a href="http://www.ncbi.nlm.nih.gov/projects/gap/cgi-bin/analysis.cgi?id=pha000953">http://www.ncbi.nlm.nih.gov/projects/gap/cgi-bin/analysis.cgi?id=pha000953</a> |
| SubclinCVD | Carotid             | RNKCAROTICAMAXAS6  | Internal carotid IMT mean max, cycle 6, log transformed age and sex-adjusted    | <a href="http://www.ncbi.nlm.nih.gov/projects/gap/cgi-bin/analysis.cgi?id=pha000955">http://www.ncbi.nlm.nih.gov/projects/gap/cgi-bin/analysis.cgi?id=pha000955</a> |
| SubclinCVD | Carotid             | RNKCAROTICAMAXMV6  | Internal carotid IMT mean max, cycle 6, log transformed multivariable-adjusted  | <a href="http://www.ncbi.nlm.nih.gov/projects/gap/cgi-bin/analysis.cgi?id=pha000957">http://www.ncbi.nlm.nih.gov/projects/gap/cgi-bin/analysis.cgi?id=pha000957</a> |
| SubclinCVD | Carotid             | RNKCAROTICAMEANAS6 | Internal carotid IMT mean mean, cycle 6, log transformed age and sex-adjusted   | <a href="http://www.ncbi.nlm.nih.gov/projects/gap/cgi-bin/analysis.cgi?id=pha000959">http://www.ncbi.nlm.nih.gov/projects/gap/cgi-bin/analysis.cgi?id=pha000959</a> |
| SubclinCVD | Carotid             | RNKCAROTICAMEANMV6 | Internal carotid IMT mean mean, cycle 6, log transformed multivariable-adjusted | <a href="http://www.ncbi.nlm.nih.gov/projects/gap/cgi-bin/analysis.cgi?id=pha000961">http://www.ncbi.nlm.nih.gov/projects/gap/cgi-bin/analysis.cgi?id=pha000961</a> |
| SubclinCVD | Carotid             | RNKCAROTSTENAS6    | Maximum Carotid Stenosis, cycle 6, age and sex-adjusted                         | <a href="http://www.ncbi.nlm.nih.gov/projects/gap/cgi-bin/analysis.cgi?id=pha000963">http://www.ncbi.nlm.nih.gov/projects/gap/cgi-bin/analysis.cgi?id=pha000963</a> |
| SubclinCVD | Carotid             | RNKCAROTSTENMV6    | Maximum Carotid Stenosis, cycle 6 multivariable-adjusted                        | <a href="http://www.ncbi.nlm.nih.gov/projects/gap/cgi-bin/analysis.cgi?id=pha000965">http://www.ncbi.nlm.nih.gov/projects/gap/cgi-bin/analysis.cgi?id=pha000965</a> |
| SubclinCVD | CT                  | RESMDCTAACAS7      | Mean Agatston AAC score, MDCT ~cycle 7, log transform, age and sex-adjusted     | <a href="http://www.ncbi.nlm.nih.gov/projects/gap/cgi-bin/analysis.cgi?id=pha000967">http://www.ncbi.nlm.nih.gov/projects/gap/cgi-bin/analysis.cgi?id=pha000967</a> |
| SubclinCVD | CT                  | RESMDCTAACMV7      | Mean Agatston AAC score, MDCT ~cycle 7, log transform multivariable-adjusted    | <a href="http://www.ncbi.nlm.nih.gov/projects/gap/cgi-bin/analysis.cgi?id=pha000969">http://www.ncbi.nlm.nih.gov/projects/gap/cgi-bin/analysis.cgi?id=pha000969</a> |
| SubclinCVD | CT                  | RESMDCTCACAS7      | Mean Agatston CAC score, MDCT ~cycle 7, log transform age and sex-adjusted      | <a href="http://www.ncbi.nlm.nih.gov/projects/gap/cgi-bin/analysis.cgi?id=pha000971">http://www.ncbi.nlm.nih.gov/projects/gap/cgi-bin/analysis.cgi?id=pha000971</a> |
| SubclinCVD | CT                  | RESMDCTCACMAXAS7   | Max Agatston CAC score, MDCT ~cycle 7, log transform age and sex-adjusted       | <a href="http://www.ncbi.nlm.nih.gov/projects/gap/cgi-bin/analysis.cgi?id=pha000973">http://www.ncbi.nlm.nih.gov/projects/gap/cgi-bin/analysis.cgi?id=pha000973</a> |
| SubclinCVD | CT                  | RESMDCTCACMAXMV7   | Max Agatston CAC score, MDCT ~cycle 7, log transform multivariable-adjusted     | <a href="http://www.ncbi.nlm.nih.gov/projects/gap/cgi-bin/analysis.cgi?id=pha000975">http://www.ncbi.nlm.nih.gov/projects/gap/cgi-bin/analysis.cgi?id=pha000975</a> |
| SubclinCVD | CT                  | RESMDCTCACMV7      | Mean Agatston CAC score, MDCT ~cycle 7, log transform multivariable-adjusted    | <a href="http://www.ncbi.nlm.nih.gov/projects/gap/cgi-bin/analysis.cgi?id=pha000977">http://www.ncbi.nlm.nih.gov/projects/gap/cgi-bin/analysis.cgi?id=pha000977</a> |
